# Supplementary material for: Comparison of single-nucleotide variants identified by Illumina and Oxford Nanopore technologies in the context of a potential outbreak of Shiga toxin–producing Escherichia coli
Source: PubMed Central journal article supplement (PMC6703438; doi:10.1093/gigascience/giz104), 2019-08-21
Supplement: giz104_giga-d-19-00070_original_submission.pdf [file giz104_giga-d-19-00070_original_submission.pdf]

# GigaScience

## Comparison of single nucleotide variants identified by Illumina and Oxford Nanopore technologies in the context of a potential outbreak of Shiga Toxin Producing *Escherichia coli* --Manuscript Draft--

|                                                      |                                                                                                                                                                                                                                                                                                                                                                                                                                                                                                                                                                                                                                                                                                                                                                                                                                                                                                                                                                                                                                                                                                                                                                                                                                                                                                                                                                                                                                                     |
|------------------------------------------------------|-----------------------------------------------------------------------------------------------------------------------------------------------------------------------------------------------------------------------------------------------------------------------------------------------------------------------------------------------------------------------------------------------------------------------------------------------------------------------------------------------------------------------------------------------------------------------------------------------------------------------------------------------------------------------------------------------------------------------------------------------------------------------------------------------------------------------------------------------------------------------------------------------------------------------------------------------------------------------------------------------------------------------------------------------------------------------------------------------------------------------------------------------------------------------------------------------------------------------------------------------------------------------------------------------------------------------------------------------------------------------------------------------------------------------------------------------------|
| <b>Manuscript Number:</b>                            | GIGA-D-19-00070                                                                                                                                                                                                                                                                                                                                                                                                                                                                                                                                                                                                                                                                                                                                                                                                                                                                                                                                                                                                                                                                                                                                                                                                                                                                                                                                                                                                                                     |
| <b>Full Title:</b>                                   | Comparison of single nucleotide variants identified by Illumina and Oxford Nanopore technologies in the context of a potential outbreak of Shiga Toxin Producing <i>Escherichia coli</i>                                                                                                                                                                                                                                                                                                                                                                                                                                                                                                                                                                                                                                                                                                                                                                                                                                                                                                                                                                                                                                                                                                                                                                                                                                                            |
| <b>Article Type:</b>                                 | Research                                                                                                                                                                                                                                                                                                                                                                                                                                                                                                                                                                                                                                                                                                                                                                                                                                                                                                                                                                                                                                                                                                                                                                                                                                                                                                                                                                                                                                            |
| <b>Funding Information:</b>                          |                                                                                                                                                                                                                                                                                                                                                                                                                                                                                                                                                                                                                                                                                                                                                                                                                                                                                                                                                                                                                                                                                                                                                                                                                                                                                                                                                                                                                                                     |
| <b>Abstract:</b>                                     | <p>Background</p> <p>We aimed to compare Illumina and Oxford Nanopore Technology (ONT) sequencing data from the two isolates of STEC O157:H7 to determine whether concordant single nucleotide variants were identified and whether inference of relatedness was consistent with the two technologies.</p> <p>Results</p> <p>For the Illumina workflow, the time from DNA extraction to availability of results, was approximately 40 hours in comparison to the ONT workflow where serotyping, Shiga toxin subtyping variant identification were available within seven hours. After optimisation of the ONT variant filtering, on average 95% of the discrepant positions between the technologies were accounted for by methylated positions found in the described 5-Methylcytosine motif sequences, CC(A/T)GG. Of the few discrepant variants (6 and 7 difference for the two isolates) identified by the two technologies, it is likely that both methodologies contain false calls.</p> <p>Conclusions</p> <p>Despite these discrepancies, Illumina and ONT sequences from the same case were placed on the same phylogenetic location against a dense reference database of STEC O157:H7 genomes sequenced using the Illumina workflow. Robust SNP typing using MinION-based variant calling is possible and we provide evidence that the two technologies can be used interchangeably to type STEC O157:H7 in a public health setting.</p> |
| <b>Corresponding Author:</b>                         | Timothy Dallman<br><br>UNITED KINGDOM                                                                                                                                                                                                                                                                                                                                                                                                                                                                                                                                                                                                                                                                                                                                                                                                                                                                                                                                                                                                                                                                                                                                                                                                                                                                                                                                                                                                               |
| <b>Corresponding Author Secondary Information:</b>   |                                                                                                                                                                                                                                                                                                                                                                                                                                                                                                                                                                                                                                                                                                                                                                                                                                                                                                                                                                                                                                                                                                                                                                                                                                                                                                                                                                                                                                                     |
| <b>Corresponding Author's Institution:</b>           |                                                                                                                                                                                                                                                                                                                                                                                                                                                                                                                                                                                                                                                                                                                                                                                                                                                                                                                                                                                                                                                                                                                                                                                                                                                                                                                                                                                                                                                     |
| <b>Corresponding Author's Secondary Institution:</b> |                                                                                                                                                                                                                                                                                                                                                                                                                                                                                                                                                                                                                                                                                                                                                                                                                                                                                                                                                                                                                                                                                                                                                                                                                                                                                                                                                                                                                                                     |
| <b>First Author:</b>                                 | David R Greig                                                                                                                                                                                                                                                                                                                                                                                                                                                                                                                                                                                                                                                                                                                                                                                                                                                                                                                                                                                                                                                                                                                                                                                                                                                                                                                                                                                                                                       |
| <b>First Author Secondary Information:</b>           |                                                                                                                                                                                                                                                                                                                                                                                                                                                                                                                                                                                                                                                                                                                                                                                                                                                                                                                                                                                                                                                                                                                                                                                                                                                                                                                                                                                                                                                     |
| <b>Order of Authors:</b>                             | David R Greig<br>Claire Jenkins<br>Saheer Gharbia<br>Timothy J Dallman                                                                                                                                                                                                                                                                                                                                                                                                                                                                                                                                                                                                                                                                                                                                                                                                                                                                                                                                                                                                                                                                                                                                                                                                                                                                                                                                                                              |
| <b>Order of Authors Secondary Information:</b>       |                                                                                                                                                                                                                                                                                                                                                                                                                                                                                                                                                                                                                                                                                                                                                                                                                                                                                                                                                                                                                                                                                                                                                                                                                                                                                                                                                                                                                                                     |

| Additional Information:                                                                                                                                                                                                                                                                                                                                                                                                                                                                                                             |          |
|-------------------------------------------------------------------------------------------------------------------------------------------------------------------------------------------------------------------------------------------------------------------------------------------------------------------------------------------------------------------------------------------------------------------------------------------------------------------------------------------------------------------------------------|----------|
| Question                                                                                                                                                                                                                                                                                                                                                                                                                                                                                                                            | Response |
| Are you submitting this manuscript to a special series or article collection?                                                                                                                                                                                                                                                                                                                                                                                                                                                       | No       |
| <p><b>Experimental design and statistics</b></p> <p>Full details of the experimental design and statistical methods used should be given in the Methods section, as detailed in our <a href="#">Minimum Standards Reporting Checklist</a>. Information essential to interpreting the data presented should be made available in the figure legends.</p> <p>Have you included all the information requested in your manuscript?</p>                                                                                                  | Yes      |
| <p><b>Resources</b></p> <p>A description of all resources used, including antibodies, cell lines, animals and software tools, with enough information to allow them to be uniquely identified, should be included in the Methods section. Authors are strongly encouraged to cite <a href="#">Research Resource Identifiers</a> (RRIDs) for antibodies, model organisms and tools, where possible.</p> <p>Have you included the information requested as detailed in our <a href="#">Minimum Standards Reporting Checklist</a>?</p> | Yes      |
| <p><b>Availability of data and materials</b></p> <p>All datasets and code on which the conclusions of the paper rely must be either included in your submission or deposited in <a href="#">publicly available repositories</a> (where available and ethically appropriate), referencing such data using a unique identifier in the references and in the “Availability of Data and Materials” section of your manuscript.</p>                                                                                                      | Yes      |

Have you have met the above requirement as detailed in our [Minimum Standards Reporting Checklist](#)?

1 **Comparison of single nucleotide variants identified by Illumina and Oxford Nanopore technologies**  
2 **in the context of a potential outbreak of Shiga Toxin Producing *Escherichia coli*.**

3  
4  
5  
6  
7 5 David R Greig, Claire Jenkins, Saheer Gharbia & Timothy J Dallman\*.  
8  
9 6

10 7 National Infection Service, Public Health England, London, NW9 5EQ.  
11

12 8 \*Corresponding author.  
13  
14 9

15  
16 10  
17 11 Author details:

18 12 David R Greig:

19 13 Email – David.Greig@phe.gov.uk  
20  
21 14

22  
23 15 Claire Jenkins:

24 16 Email - Claire.Jenkins1@phe.gov.uk  
25  
26 17

27 18 Saheer Gharbia

28 19 Email – Saheer.Gharbia@phe.gov.uk  
29  
30 20

31 21 Timothy J Dallman:

32 22 Email - Tim.Dallman@phe.gov.uk  
33  
34 23

35 24  
36 25 Keywords –Oxford Nanopore, Illumina, Variant calling, STEC, outbreak.  
37  
38 26  
39 27  
40  
41  
42  
43  
44  
45  
46  
47  
48  
49  
50  
51  
52  
53  
54  
55  
56  
57  
58  
59  
60  
61  
62  
63  
64  
65

28 **Abstract**

29 **Background**

30 We aimed to compare Illumina and Oxford Nanopore Technology (ONT) sequencing data from the  
31 two isolates of STEC O157:H7 to determine whether concordant single nucleotide variants were  
32 identified and whether inference of relatedness was consistent with the two technologies.

33 **Results**

34 For the Illumina workflow, the time from DNA extraction to availability of results, was approximately  
35 40 hours in comparison to the ONT workflow where serotyping, Shiga toxin subtyping variant  
36 identification were available within seven hours. After optimisation of the ONT variant filtering, on  
37 average 95% of the discrepant positions between the technologies were accounted for by  
38 methylated positions found in the described 5-Methylcytosine motif sequences, CC(A/T)GG. Of the  
39 few discrepant variants (6 and 7 difference for the two isolates) identified by the two technologies, it  
40 is likely that both methodologies contain false calls.

41 **Conclusions**

42 Despite these discrepancies, Illumina and ONT sequences from the same case were placed on the  
43 same phylogenetic location against a dense reference database of STEC O157:H7 genomes  
44 sequenced using the Illumina workflow. Robust SNP typing using MinION-based variant calling is  
45 possible and we provide evidence that the two technologies can be used interchangeably to type  
46 STEC O157:H7 in a public health setting.

47  
48  
49  
50

## 51 Background

52 Shiga toxin producing *Escherichia coli* (STEC) O157:H7 is a zoonotic, foodborne pathogen defined by  
53 the presence of phage-encoded Shiga toxin genes (*stx*) [1]. Disease symptoms range from mild  
54 through to severe bloody diarrhoea, often accompanied by fever, abdominal cramps and vomiting  
55 [2]. The infection can progress to Haemolytic Uremic Syndrome (HUS), characterized by kidney  
56 failure and/or cardiac and neurological complications [3,4]. Transmission from an animal reservoir,  
57 mainly ruminants, occurs by direct contact with animals or their environment, or by the  
58 consumption of contaminated food products with reported vehicles including beef and lamb meat,  
59 dairy products, raw vegetables and salad [2,4].

60  
61 STEC O157:H7 belongs to multi-locus sequence type clonal complex (CC) 11, with all but a small  
62 number of variants belonging to sequence type ST11. CC11 comprises three main lineages (I, II and  
63 I/II) and seven sub-lineages (Ia, Ib, Ic, IIa, IIb, IIc and I/II) [5]. There are two types of Shiga toxin, Stx1  
64 and Stx2. Stx1 has four subtypes (1a-1d) and Stx2 has seven subtypes (2a-2g). Subtypes 1a, 2a, 2c,  
65 and rarely 2d, are found in STEC O157:H7. Strains harbouring *stx2a* are significantly associated with  
66 cases that develop HUS [2,6]. As well as harbouring *stx* encoding prophage, STEC O157:H7 has an  
67 additional prophage repertoire accounting for at least 20% of the chromosome.

68  
69 The implementation of whole genome sequencing (WGS) data for typing STEC has improved the  
70 detection and management of outbreaks of foodborne disease [6]. Single nucleotide polymorphism  
71 (SNP) typing offers an unprecedented level of strain discrimination and can be used to quantify the  
72 genetic relatedness between groups of genomes. In general, for clonal bacteria, the fewer  
73 polymorphisms identified between pairs of strains, the less time since divergence from a common  
74 ancestor and therefore the increased likelihood that they are from the same source population.  
75 Therefore, it is paramount that variant detection for typing is accurate, highly specific and  
76 concentrated on positions of neutral evolution to ensure the correct interpretation of the sequence  
77 data within the epidemiological context of an outbreak. It has been previously shown that different  
78 bioinformatics analysis approaches for variant identification exhibit detection variability [7,8]. It is  
79 therefore important that within a particular analysis, workflow parameters to filter identified  
80 variants to achieve optimum sensitivity and specificity are appropriately optimised.

81  
82 Short read sequencing platforms, such as those provided by Illumina, have been adopted by public  
83 health agencies for infectious disease surveillance worldwide [9] and have proved to be a robust and  
84 accurate method for quantifying relatedness between bacterial genomes. High-throughput Illumina

85 sequencing although cost effective, often requires batch processing of hundreds of microbial isolates  
86 to achieve cost savings and therefore this approach offers less flexibility for urgent, small scale  
87 sequencing often required during public health emergencies [10]. In contrast, Oxford Nanopore  
88 Technologies (ONT) offers a range of rapid real-time sequencing platforms from the portable  
89 MinION to the higher throughput GridION and PromethION models, although at this time lower read  
90 accuracy compared to Illumina data suggests accurate variant calling maybe problematic.

91  
92 In September 2017, Public Health England (PHE) was notified of two cases of HUS in two children  
93 admitted to the same hospital on the same night. STEC O157:H7 was isolated from the faecal  
94 specimens of both cases. In order to rapidly determine whether or not the cases were part of a  
95 related phylogenetic cluster and therefore likely to be epidemiologically linked to each other, or to  
96 any other cases in the PHE database, we sequenced both isolates using the MinION platform and  
97 integrated the ONT sequencing data with a dense reference database of Illumina sequences. We  
98 aimed to compare Illumina and ONT sequencing data from the two isolates to assess the utility of  
99 the ONT method for urgent, small scale sequencing, and to determine whether the same single  
100 nucleotide variants were identified and whether inference of relatedness was consistent with the  
101 two technologies.

## 102 103 **Data description**

104 Paired-end FASTQ files were generated from the Illumina HiSeq 2500 for both samples (cases). Raw  
105 long-read data (FAST5) was generated from the MinION and basecalled using Albacore (FASTQ) in  
106 real-time. Both technologies derived FASTQ reads were trimmed and filtered (Trimmomatic,  
107 Porechop, Filtlong) before being aligned (BWA, Minimap2) to a reference genome (NC\_002695.1).  
108 Variant positions were called using GATK before being imported into SnapperDB. Full processing  
109 details can be found within the methods section.

## 110 111 **Results**

### 112 *Comparison of typing results generated by Illumina and ONT workflows*

113 To consider the potential benefits of real-time sequencing to enhance opportunities for early  
114 outbreak detection, the timelines from DNA extraction to result generation for Illumina and ONT  
115 workflows were evaluated (Figure 1) and the relationship between yield, time and genome coverage  
116 plotted (Figure 2). For the ONT workflow, the time from DNA extraction to completion of the  
117 sequencing run was 28 hours. A total yield of 0.45 Gbases for the isolate from Case A and 0.59  
118 Gbases for the isolate from Case B was achieved which corresponds to an equivalent coverage of the

119 Sakai O157 STEC reference genome (5.4Mb) of 81.29X and 108.30X for isolate A and B respectively.

120 The average PHRED quality score for all reads in Case A was 9.87 and Case B was 9.47, which is

121 approximately 1 error every 10 bases. Base-calling and analysis was performed in real-time and

122 serotyping, Shiga toxin subtyping and variant identification were available within six hours and

123 twenty minutes of the 24-hour sequencing run. With respect to the Illumina sequencing workflow,

124 the time from DNA extraction to availability of results, assuming there were no breaks in the

125 process, was just under 40 hours (Figure 1).

126

127 The species identification, serotype, MLST profile and Shiga toxin subtype results generated by both

128 Illumina and ONT workflows were concordant with both isolates identified as *Escherichia coli*

129 O157:H7 ST11 (12,12,8,12,15,2,2), *stx2a* and *stx2c*. During the ONT sequencing run, the bacterial

130 species was unambiguously identified in less than one minute for both cases (Figure 1). Additionally,

131 using Krocus, a confirmed MLST was generated for Case A at 1:54 hours and Case B at 10:39 hours

132 into the sequencing run. This was the point at which the last read required to generate a consensus

133 on the MLST was base-called. By 93 minutes for Case A and 41 min for Case B, it was possible to

134 determine the *E. coli* O157:H7 serotype, and *stx2a* and *stx2c* were detected at 58 and 24 minutes

135 into the sequencing run for Case A and Case B, respectively.

136

### 137 *Optimisation of ONT variant calling*

138 To compare Illumina and ONT sequences within a standardised framework it was necessary to

139 optimise the parameters for variant filtering within GATK2 to compensate for the lower read

140 accuracy observed in the ONT data. Using Case B for the optimisation, base calls in the ONT data

141 were classified as true positives (variant base detected by both methods), false positives (variant

142 base in ONT, reference base in Illumina), true negatives (reference base in Illumina and ONT) or false

143 negatives (variant base in Illumina, reference base in ONT). To disregard areas of the genome that

144 the ONT reads could map to (and therefore identify variants) but were ambiguously mapped with

145 Illumina reads, pre-filtering was performed by masking regions annotated as phage in the reference

146 genome and those that could not be accurately self-mapped with simulated reference Illumina

147 FASTQ reads. Figure 3 plots the precision (the proportion of true positives with respect to all

148 positives calls) against the recall/sensitivity (the proportion of true positives identified with respect

149 to all true positives) for an array of consensus ratio cut-offs for each of the masking strategies.

150 Similar areas 'under the curve' were achieved for the different masking strategies with slightly

151 higher precision at lower recall achieved with 'self-masking' (AUC – 0.71) and slightly higher recall at

152 lower precision with explicit masking of the Sakai prophage (AUC – 0.75). The absence of a masking



strategy markedly affects the precision of variant calling with ONT data, in comparison of Illumina as a gold standard (AUC – 0.30). To identify the optimum consensus cut-off for filtering ONT variants processed through GATK the F1 score was calculated at each consensus cut-off. A consensus cut-off of 0.8 maximised the precision and recall (Figure 4) irrespective of the filtering methods.

#### *Investigation of the discrepant variants identified between the Illumina and ONT data*

After optimised quality and prophage filtering there were 266 and 101 base positions for Cases A and B respectively that were discordant between the ONT and Illumina sequencing data. The majority of discrepancies were where the ONT data identified a variant not identified in the Illumina data (261/266 (98.12%) and 95/101 (94.06%) discrepant base positions for Cases A and B respectively). In contrast the Illumina data identified 5 (1.88%) discrepant base positions as variants for Case A and 6 (5.94%) for case B (Table 1) not identified by the ONT data.

| Variants and reason for omission.                                               | Case A       |         | Case B       |         |
|---------------------------------------------------------------------------------|--------------|---------|--------------|---------|
|                                                                                 | Illumina VCF | ONT VCF | Illumina VCF | ONT VCF |
| <b>Total # of variants against the reference genome post quality filtering.</b> | 2076         |         | 1424         |         |
| <b># of variants with masked due to location in phage</b>                       | 708          |         | 531          |         |
| <b># of discrepant variants called between case A and B alone.</b>              | 266          |         | 101          |         |
| <b># of variants in each VCF.</b>                                               | 5            | 261     | 6            | 95      |
| <b># of variants with methylated positions masked.</b>                          | 0            | 260     | 0            | 94      |
| <b>Final variants.</b>                                                          | 5            | 1       | 6            | 1       |

**Table 1** – Table showing the breakdown of the total number of variants of each technology against the reference genome, followed by the numbers of masked variants within prophage or methylated positions.

For both cases the most common discrepant variant were adenines classified as guanines in the ONT data with respect to the Illumina data (and reference), accounting for 68.05% (181/266) for Case A and 72.28% (73/101) for Case B. The second most common discrepancy was thymine being classified as cytosine in the ONT data accounting for 29.70% (79/266) in Case A and 22.80% (21/101) in Case B (Table 1). Of the transitions described above, 97.74% (Case A) and 93.07% (Case B) occurred when the variant was between two homopolymeric regions of multiple cytosines and guanines (Figure 5). These homopolymeric regions were similar to described DNA cytosine methylase (Dcm) binding sequences [11]. Nanopolish was subsequently used to identify likely Dcm, 5' – cytosine – phosphate – guanine – 3' (CpG) and DNA adenine methyltransferase (Dam) methylation sites in the ONT sequencing data and confirmed 260/266 (97.74%) and 94/101 (93.07%)

181 discrepant variants in the ONT data were classed as methylated for Cases A and B respectively. All of  
 182 which were determined to be Dcm methylation for both cases.

183

184 Once the methylated positions were masked from the analysis, there were a total of 6 (5 discrepant  
 185 variants in Illumina and 1 ONT) and 7 (6 discrepant variants in Illumina and 1 ONT) discrepant SNPs  
 186 between the ONT and Illumina data, for Cases A and B respectively (Table 2 & 3). Four discrepant  
 187 Illumina variants are shared by both Case A and Case B. One shared variant was found in a non-  
 188 coding region, another shared variant was found in *rhsC* encoding an RHS (rearrangement hotspot)  
 189 protein defined by the presence of extended repeat regions. Two further shared variants were  
 190 found in *dadX*, an alanine racemase gene. *dadX* is a paralogue of *alr*, also annotated as an alanine  
 191 racemase in the *Sakai* reference genome with significant nucleotide similarity (>75% nucleotide  
 192 identity). Both intra and inter gene repeats are known to be regions of potential false positives calls  
 193 with Illumina data due to miss-mapping.

194

| SNP | Position  | BASE in Ref | BASE in Illum | Depth in Illum | BASE in ONT | Depth in ONT | Variant | Locus tag  | Annotation                                       |
|-----|-----------|-------------|---------------|----------------|-------------|--------------|---------|------------|--------------------------------------------------|
| 1   | 270,595   | C           | A             | 46             | C           | 141          | A       | ECs0237    | rhsC                                             |
| 2   | 379,516   | A           | G             | 114            | A           | 100          | G       | NON CODING | N                                                |
| 3   | 1,681,338 | C           | G             | 59             | C           | 61           | G       | ECs1685    | alanine racemase 2                               |
| 4   | 1,681,339 | G           | C             | 57             | G           | 61           | C       | ECs1685    | alanine racemase 2                               |
| 5   | 2,636,513 | T           | C             | 91             | T           | 69           | C       | ECs2674    | hypothetical protein                             |
| 6   | 4,709,195 | A           | A             | 86             | G           | 82           | G       | ECs4673    | membrane-bound ATP synthase epsilon-subunit AtpC |

195

196 **Table 2** – Table showing the final discrepant SNPs between the Illumina data and ONT data for case  
 197 A. Also shown is the base as it is in the reference, the Illumina called base and read depth at that  
 198 position and the same for the ONT data. Finally, also included is the locus tag relative to the  
 199 reference genome and the gene annotation.

200

| SNP | Position  | BASE in Ref | BASE in Illum | Depth in Illum | BASE in ONT | Depth in ONT | Variant | Locus tag  | Annotation                |
|-----|-----------|-------------|---------------|----------------|-------------|--------------|---------|------------|---------------------------|
| 1   | 270,595   | C           | A             | 19             | C           | 207          | A       | ECs0237    | rhsC                      |
| 2   | 379,516   | A           | G             | 52             | A           | 124          | G       | NON CODING | N                         |
| 3   | 1,681,338 | C           | G             | 44             | C           | 86           | G       | ECs1685    | alanine racemase 2        |
| 4   | 1,681,339 | G           | C             | 41             | G           | 86           | C       | ECs1685    | alanine racemase 2        |
| 5   | 2,033,176 | T           | G             | 34             | T           | 85           | G       | ECs2049    | hypothetical protein      |
| 6   | 2,731,621 | A           | C             | 52             | A           | 73           | C       | NON CODING | N                         |
| 7   | 4,901,209 | A           | A             | 49             | G           | 102          | G       | ECs4834    | superoxide dismutase SodA |

201

202 **Table 3** – Table showing the final discrepant SNPs between the Illumina data and ONT data for case  
203 B. Also shown is the base as it is in the reference, the Illumina called base and read depth at that  
204 position and the same for the ONT data. Finally, also included is the locus tag relative to the  
205 reference genome and the gene annotation.

206

### 207 *Phylogenetic Analysis*

208 Using the optimised variant calling parameters both strains clustered phylogenetically in lineage Ic  
209 within a dense reference database of STEC O157:H7 genomes (n=4475). However, the genomes  
210 were located in distinct sub-clades (Figure 6). It was, therefore, unlikely that the isolates originated  
211 from the same source, and it was concluded that Cases A and B were not epidemiologically linked.  
212 Following phylogenetic analysis of the Illumina SNP typing data (Figure 6), Case A was designated a  
213 sporadic case. However, Case B clustered with a concurrent outbreak, already under investigation,  
214 comprising three additional cases. The Illumina sequence linked to Case B was zero SNPs different  
215 from the other three cases in the cluster, whereas the ONT sequence was 7 SNPs different, when  
216 excluding the methylated positions (Table 3). Based on the ONT sequencing data alone, this  
217 discrepancy would have led to uncertainty as to whether or not the Case B was linked to the  
218 outbreak.

219

### 220 *Assembly Profile*

221 The ONT-only assembly resolved to five contigs (5.73 mb) for Case A and four contigs (5.60 mb) for  
222 Case B (Supplementary Table 1). In Case A, the five contigs were determined to be a single  
223 chromosomal contig, a single plasmid contig (pO157) and the three prophage duplications. In Case B,  
224 the four contigs were determined to be a single chromosomal contig with two plasmids (one being  
225 the pO157). For Case A the assembly resolved to 25 contigs (5.51mb) with a hybrid assembly and  
226 668 contigs (5.45 mb) with an Illumina only assembly. Case B resolved to 34 contigs (5.49 mb) with a  
227 hybrid assembly and 575 contigs (5.42 mb) with an Illumina only assembly.

228

229 Alignment of the assemblies (Supplementary Figures 1 and 2) revealed several locations within the  
230 ONT-only assembly that there were absent in the hybrid and Illumina-only assemblies. In Case A,  
231 there were 8 regions only present within the ONT-only chromosome assembly, of which 7 are  
232 related to prophage regions (Supplementary Figure 1). In case B, there were 10 chromosomal  
233 regions in the ONT-only assembly that did not align to the other assemblies. All 10 regions were  
234 associated with prophage regions (Supplementary Figures 2).

235

236 **Discussion**

1 237 In this study, the two isolates sequenced using ONT were unambiguously identified as STEC O157:H7  
2  
3 238 ST 11 *stx2a/stx2c* in less than 15 hours and it was possible to distinguish the genetic relatedness  
4  
5 239 between the isolates within 377 minutes. The WGS turn-around time from DNA extraction and  
6  
7 240 library preparation, to sequencing and analysis via the Illumina workflow at PHE, is three to six days.  
8  
9 241 Although this turnaround time is rapid for a service utilising batch processing on the HiSeq  
10  
11 242 platforms, the sequencing approach using the MinION, whereby individual samples or small  
12  
13 243 barcoded batches are loaded and results generated and analysed in real-time, has the potential to  
14  
15 244 be faster and more flexible. This approach is therefore ideal for urgent, small scale sequencing,  
16  
17 245 often required during public health emergencies. In this scenario, analysis of the ONT data provided  
18  
19 246 evidence that the two cases were not epidemiologically linked and, although efforts were made to  
20  
21 247 determine the potential source of the infection for both cases through the National Enhanced STEC  
22  
23 248 Surveillance System [2], an outbreak investigation was not initiated.

24  
25 250 A current limitation of MinION sequencing is its lower read accuracy when compared to short-read  
26  
27 251 technologies [12,13,14,15,16]. This accuracy has improved as the technology has matured but still  
28  
29 252 falls short of the 99% accuracy offered by short-read platforms [15]. There are a number of factors at  
30  
31 253 play that contribute to the low signal to noise ratio currently inherent in the nanopore data including  
32  
33 254 structural similarity of nucleotides, simultaneous influence of multiple nucleotides on the signal, the  
34  
35 255 non-uniform speed at which nucleotides pass through the pore and the fact that the signal does not  
36  
37 256 change within homopolymers [15]. Despite the current limitations of the technology, when mapped  
38  
39 257 to references sequences in an established database of Illumina sequences, the ONT and Illumina  
40  
41 258 workflow placed the sequences from the same case on the same branch in a dense reference  
42  
43 259 database of STEC O157:H7 genomes sequenced using the Illumina workflow.

44 260  
45 261 Although analysis of the Illumina and ONT sequencing data placed the sequences on the same  
46  
47 262 branch on the phylogeny, there were SNP discrepancies between the sequences generated by the  
48  
49 263 two different workflows, even after optimisation of the parameters. The vast majority of the  
50  
51 264 discrepant SNPs (261/266 – 98.12% and 95/101 – 94.06 % for Cases A and B respectively) were  
52  
53 265 attributed to variants identified in the ONT data and not the Illumina data. The majority of  
54  
55 266 discrepancies (97.74% in Case A and 93.07% in Case B) were found in sequences that are the same as  
56  
57 267 the known 5-Methylcytosine motif sequences, CC(A/T)GG [11,17] in the ONT data. Following a  
58  
59 268 search of the ONT discrepant SNPs for CpG, Dam and Dcm methylation using Nanopolish, the  
60  
61  
62  
63  
64  
65

269 majority (97.74% and 93.07% for case A and B respectively) of the ONT discrepant SNPs were  
270 identified in Dcm methylated regions.

271

272 As Nanopolish is detecting these methylated positions with the use of the raw FAST5 data, it is  
273 suggested that these particular discrepancies appear during the basecalling process. Albacore  
274 handles most methylation well across the three methylation models searched for by Nanopolish, for  
275 example only 94 out of 13,504 methylated positions were considered incorrect by base calling for  
276 Case B. However, for mapping based-SNP typing, this level of error in base calling means that it is  
277 not possible to accurately determine the number of SNPs, thus potentially obscuring the true  
278 phylogenetic relationship between isolates of STEC O157:H7.

279

280 The optimisation of variant filtering was performed using the Illumina data as a gold standard.  
281 However, it is possible that the alignment of the Illumina data might have generated false SNPs  
282 based on reads mapping to ambiguous regions of the genome, whereas the long reads obtained  
283 using the ONT workflow is able to resolve these ambiguous regions and call variants, or not, at these  
284 positions correctly. As the Illumina data was used as the gold standard, in this scenario SNPs  
285 produced in the Illumina data would have been classed incorrectly as false negatives in the ONT  
286 data. Discrepant variants identified in the Illumina data were attributed mainly to potentially false  
287 mapping of Illumina reads to homologous regions of the reference genome, variants which were  
288 misidentified at the same position independently in Case A and Case B. Furthermore, comparison of  
289 assemblies generated by ONT reads, Illumina reads and a hybrid approach highlights the extra  
290 genetic content accessible to ONT assemblies where variation can be quantified.

291

292 In this study an ONT sequencing workflow was used to rapidly rule out an epidemiological link  
293 between two children admitted to the same hospital on the same day with symptoms of HUS. The  
294 isolates of STEC O157:H7 from each child mapped to different clades within the same STEC O157:H7  
295 lineage (Ic). We provide further evidence that SNP typing using MinION-based variant calling is  
296 possible when the coverage of the variation is high [15]. The error rate exhibited by ONT sequencing  
297 workflows continue to improve due to developments in the pore design, the library preparation  
298 methods, innovations in base-calling algorithms and the introduction of post-sequencing correction  
299 tools, such as Nanopolish [15,21]. Currently, both short and long read technologies are used for  
300 public health surveillance, and there is a need to integrate the outputs so that all the data can be  
301 analysed in the same way. Recently, Rang et al [15] reiterated how the scientific community can  
302 make valuable contributions to improving ONT read accuracy by systematically comparing

303 computational strategies as highlighted in this study and elsewhere [22]. On-going up-dates to the  
1 304 chemistry and software tools will facilitate the robust detection of SNPs enabling ONT to compete  
2 305 with short read platforms, ultimately enabling the two technologies to be used interchangeably in  
3 306 clinical and public health settings.  
4  
5  
6

7 307

## 8 308 **Methods**

### 9 309 *DNA extraction, Library preparation and Illumina Sequencing*

10 310 Genomic DNA was extracted from two strains of STEC O157 isolates from two HUS cases admitted to  
11 311 the same hospital on the same night. Using a Qiagen Qiasymphony (Qiagen, Hilden, Germany) to  
12 312 manufactures instructions, genomic DNA extracted and quantified using a Qubit and the BR dsDNA  
13 313 Assay Kit (ThermoFisher Scientific, Waltham, USA) to manufactures instructions. The sequencing  
14 314 library was prepared by fragmenting and tagging the purified gDNA using the Nextera XT DNA  
15 315 Sample Preparation Kits (Illumina, Cambridge, UK) to manufactures instructions. The prepared  
16 316 library was loaded onto an Illumina HiSeq 2500 (Illumina, Cambridge, UK) at PHE and sequencing  
17 317 performed in rapid run mode yielding paired-end 100bp reads.  
18  
19  
20  
21  
22  
23  
24  
25

26 318

### 27 319 *Processing and analysis of Illumina sequence data*

28 320 FASTQ reads were processed using Trimmomatic v0.27 [23] to remove bases with a PHRED score of  
29 321 less than 30 from the leading and trailing ends, with reads less than 50 bp after quality trimming  
30 322 discarded. A *k*-mer approach (<https://github.com/phe-bioinformatics/kmerid>) was used to confirm  
31 323 the species of the samples. Sequence type (ST) assignment was performed using MOST v1.0  
32 324 described by [24]. *In silico* serotyping was performed by using GeneFinder, an inhouse PHE  
33 325 programme (Doumith, unpublished) which uses Bowtie v2.2.5 [25] and Samtools v0.1.18 [26] to  
34 326 align FASTQ reads to a multifasta containing the target genes (including *wzx*, *wzy* and *fliC*). *Stx* sub-  
35 327 typing was performed as described in [27]. Illumina FASTQ reads were mapped to the Sakai STEC  
36 328 O157 reference genome (NC\_002695.1) using BWA MEM v0.7.13 [28]. Variant positions identified by  
37 329 GATK v2.6.5 UnifiedGenotyper [29] that passed the following parameters; >90% consensus,  
38 330 minimum read depth of 10, Mapping Quality (MQ) >= 30. Any variants called at positions that were  
39 331 within the known prophages in Sakai were masked from further analyses. The remaining variants  
40 332 were imported into SnapperDB v0.2.5 [30].  
41  
42  
43  
44  
45  
46  
47  
48  
49  
50  
51  
52

53 333

### 54 334 *DNA extraction, Library preparation and Nanopore Sequencing*

55 335 Genomic DNA was extracted and purified using the Promega Wizard Genomic DNA Purification Kit  
56 336 (Promega, Madison, USA) with minor alterations including doubled incubation times, no vigorous  
57  
58  
59  
60  
61  
62  
63  
64  
65

337 mixing steps (performed by inversion) and elution into 50µl of double processed nuclease free water  
338 (Sigma-Aldrich, St. Louis, USA). DNA was quantified using a Qubit and the HS (High sensitivity) dsDNA  
339 Assay Kit (ThermoFisher Scientific, Waltham, USA) to manufactures instructions. Library preparation  
340 was performed using the Rapid Barcoding Kit - SQK-RBK001 (Oxford Nanopore Technologies, Oxford,  
341 UK) with each sample's gDNA being barcoded by transposase based tagmentation and pooled as per  
342 manufactures instructions. The prepared library was loaded on a FLO-MIN106 R9.4 flow cell (Oxford  
343 Nanopore Technologies, Oxford, UK) and sequenced using the MinION for 24 hours.

344

#### 345 *Processing and analysis of Nanopore sequence data*

346 Raw FAST5 files were basecalled and de-multiplexed in real-time, as reads were being generated,  
347 using Albacore v2.1 (Oxford Nanopore Technologies) into FASTQ files. Run metrics were generated  
348 using Nanoplot v1.8.1 using default parameters [31]. Reads were processed through Porechop v0.2.1  
349 using default parameters (Wick. Unpublished) [32] to remove any barcodes and adapters used in  
350 SQK-RBK001. Samples were speciated using Kraken v0.10.4 [33]. A MLST was assigned using Krocus  
351 with the following parameters --kmer 15, --min\_block\_size 300 and --margin 500 [34]. *Stx* sub-typing  
352 and serotyping was determined by aligning the basecalled reads using minimap2 v2.2 [35] and  
353 Samtools v1.1 [26] to a multifasta containing the *Stx* and serotype encoding genes.

354

355 For reference based variant calling FASTQ reads were mapped to the Sakai STEC O157 reference  
356 genome (NC\_002695.1) using minimap2 v2.2 [35]. VCFs were produced using GATK v2.6.5  
357 UnifiedGenotyper [29]. Any variants called at positions that were within the known prophages in  
358 Sakai were masked from further analyses. To determine the optimum consensus cut-off for ONT  
359 variant detection the VCF was filtered with sequentially decreasing ad-ratio values at 0.1 intervals.  
360 Using the Illumina variant calls as the gold standard, F1 scores (the weighted average of precision  
361 and recall) were calculated to determine the optimal ad-ratio for processing ONT data through  
362 GATK.

363

#### 364 *Comparison of Illumina and Nanopore discrepant SNPs*

365 Nanopolish [21] was also used to detect methylation across the ONT data to compare to the  
366 discrepant positions. This was performed using the call-methylation function searching for three  
367 types of methylation including, the DNA adenine methyltransferase (Dam), DNA cytosine methylase  
368 (Dcm) and 5' – cytosine – phosphate – guanine – 3' (CpG) models. The discrepant SNPs between the  
369 Illumina and ONT for both Case A and Case B were manually visualised in Tablet v1.17.08.17 [36] in

370 order to elucidate the reason for the discrepancy. Discordant SNPs being within a homopolymeric  
371 region were also quantified.

372

### 373 *Generation of phylogenetic trees*

374 Filtered VCF files for each of the Illumina and ONT sequencing data for each sample, were  
375 incorporated, into SnapperDB v0.2.5 [30] containing variant calls from 4471 other STEC CC11  
376 genomes generated through routine surveillance by Public Health England. SnapperDB v0.2.5 [30]  
377 was used to generate a whole genome alignment of the 4475 genomes (including both datasets for  
378 the selected strains for this study). Both methylated positions and prophage positions were masked  
379 from the alignment. The alignment was processed through Gubbins V2.0.0 [37] to account for  
380 recombination events. A maximum likelihood tree was then constructed using RAxML V8.1.17 [38].

381

### 382 *Assembly of ONT data*

383 Trimmed ONT FASTQ files were assembled using Canu v1.6 [39]. Polishing of the assemblies was  
384 performed using Nanopolish v0.10.2 [21] using both the trimmed ONT FASTQs and FAST5s for each  
385 respective sample accounting form methylation using the --methylation-aware option set to dcm.  
386 Assemblies were reoriented to start at the *dnaA* gene (NC\_000913) from *E. coli* K12, using the  
387 fixstart parameter in circulator v1.5.5 [40].

388

### 389 *Hybrid assemblies*

390 Trimmed ONT FASTQ files were assembled using Unicycler v0.4.2 [41] with the following parameters  
391 min\_fasta\_length=1000, mode=normal and -1 and -2 for the incorporation of each sample's  
392 equivalent Illumina FASTQ. Pilon v1.23 [42] was used to correct the assembly using the Illumina  
393 reads.

394

### 395 *Assembly of Illumina data*

396 Illumina reads were assembled using SPAdes v3.13.0 [43] with the careful parameter activated and  
397 with kmer lengths of 21, 33, 55, 65, 77, 83 and 91.

398

### 399 *Annotation*

400 Prokka v1.13 [44] with the species set to *E. coli* was used to annotate the final assemblies.  
401 Mauve snapshot\_2015-02-25 (1) [45] using the "move contig" function was used to align each  
402 assembly to the ONT reference as they had the least number of contigs.

403



404 **Availability of supporting data**

1 405 The FASTQ files for the paired read Illumina sequence data can be found on the NCBI (National  
2  
3 406 Center for Biotechnology Information) Sequence Read Archive (SRA); Case A accession: SRR7184397,  
4  
5 407 Case B accession - SRR6052929. The ONT FASTQ files, Case A accession – SRR7477814, Case B  
6  
7 408 accession - SRR7477813. All files can be found under BioProject - PRJNA315192.

8  
9 409  
10 **Abbreviations**

11 411 AUC: Area under curve; BWA: Burrows-Wheeler aligner; CC: Clonal complex; Dam: DNA adenine  
12  
13 412 methyltransferase; Dcm: DNA cytosine methylase; GATK: Genome analysis toolkit; HUS: Haemolytic  
14  
15 413 Uremic Syndrome; MLST: Multi-locus sequence type; NCBI: National Center for Biotechnology  
16  
17 414 Information; ONT: Oxford Nanopore Technologies; PHE: Public Health England; SNP: Single  
18  
19 415 nucleotide polymorphism; SRA: Sequence read archive; STEC: Shiga toxin-producing *Escherichia coli*;  
20  
21 416 VCF: Variant call format; WGS: Whole genome sequencing.

22  
23 417  
24  
25 **Author contributions**

26 419 CJ and TJD conceptualised the project. CJ and DRG performed DNA extractions. DRG performed  
27  
28 420 library preparation and Nanopore sequencing. TJD and DRG processed Illumina sequence data. DRG  
29  
30 421 processed all ONT data. TJD performed ONT optimisation. DRG performed methylation analysis. TJD  
31  
32 422 and DRG performed Illumina and ONT data comparison. CJ wrote the original draft. DRG, CJ, SG and  
33  
34 423 TJD performed manuscript editing.

35 424  
36  
37 **Competing interests**

38  
39 426 This project was part funded by Oxford Nanopore Technologies.  
40  
41 427

42 **Acknowledgements**

43  
44 429 We would like to thank Oxford Nanopore Technologies for funding this research. In particular we  
45  
46 430 would like to thank Leila Luheshi and Divya Mirrington for their support and scientific assistance.  
47  
48 431 We would also like to thank the frontline NHS Laboratories for submitting the samples used in this  
49  
50 432 study to the Gastrointestinal Bacteria Reference Unit at Public Health England.  
51  
52 433 We would like to acknowledge Dr Andrew Page of the Quadram Institute for critically reviewing the  
53  
54 434 manuscript.

55 435  
56  
57 **References**  
58  
59  
60  
61  
62  
63  
64  
65

437 1. Croxen MA, Law RJ, Scholz R, Keeney KM, Wlodarska M, Finlay BB. Recent advances in  
1 438 understanding enteric pathogenic *Escherichia coli*. Clin Microbiol Rev. 2013. 26(4):822-80.  
2 439 doi: 10.1128/CMR.00022-13.  
3  
4 440 2. Byrne L, Jenkins C, Launders N, Elson R, Adak GK. The epidemiology, microbiology and  
5 441 clinical impact of Shiga toxin-producing *Escherichia coli* in England, 2009-2012. Epidemiol  
6 442 Infect. 2015. 143(16):3475-87. doi: 10.1017/S0950268815000746.  
7  
8 443 3. Launders N, Byrne L, Jenkins C, Harker K, Charlett A, Adak GK. Disease severity of Shiga toxin-  
9 444 producing *E. coli* O157 and factors influencing the development of typical haemolytic  
10 445 uraemic syndrome: a retrospective cohort study, 2009-2012. BMJ Open. 2016. 6(1):e009933.  
11 446 doi: 10.1136/bmjopen-2015-009933.  
12  
13 447 4. Heiman KE, Mody RK, Johnson SD, Griffin PM, Gould LH. *Escherichia coli* O157 Outbreaks in  
14 448 the United States, 2003-2012. Emerg Infect Dis. 2015. 21(8):1293-1301. doi:  
15 449 10.3201/eid2108.141364.  
16  
17 450 5. Dallman TJ, Ashton PM, Byrne L, Perry NT, Petrovska L, Ellis R, Allison L, Hanson M, Holmes  
18 451 A, Gunn GJ, Chase-Topping ME, Woolhouse ME, Grant KA, Gally DL, Wain J, Jenkins C.  
19 452 Applying phylogenomics to understand the emergence of Shiga-toxin-producing *Escherichia*  
20 453 *coli* O157:H7 strains causing severe human disease in the UK. Microb Genom. 2015.  
21 454 1(3):e000029. doi: 10.1099/mgen.0.000029.  
22  
23 455 6. Dallman TJ, Byrne L, Ashton PM, Cowley LA, Perry NT, Adak G, Petrovska L, Ellis RJ, Elson R,  
24 456 Underwood A, Green J, Hanage WP, Jenkins C, Grant K, Wain J. Whole-genome sequencing  
25 457 for national surveillance of Shiga toxin-producing *Escherichia coli* O157. Clin Infect Dis. 2015.  
26 458 61(3):305-12. doi: 10.1093/cid/civ318.  
27  
28 459 7. Olson ND, Lund SP, Colman RE, Foster JT, Sahl JW, Schupp JM, Keim P, Morrow JB, Salit ML,  
29 460 Zook JM. Best practices for evaluating single nucleotide variant calling methods for microbial  
30 461 genomics. Front Genet. 2015. 6(235): doi: 10.3389/fgene.2015.00235.  
31  
32 462 8. Ruffalo M, Koçtürk M, Ray S, LaFramboise T. Accurate estimation of short read mapping  
33 463 quality for next-generation genome sequencing. Bioinformatics. 2012. 28(18):i349-i355. doi:  
34 464 10.1093/bioinformatics/bts408.  
35  
36 465 9. Timme RE, Rand H, Sanchez Leon M, Hoffmann M, Strain E, Allard M, Roberson D, Baugher  
37 466 JD. GenomeTrakr proficiency testing for foodborne pathogen surveillance: an exercise from  
38 467 2015. Microb Genom. 2018. 4(7). doi: 10.1099/mgen.0.000185.  
39  
40 468 10. Quick J, Loman NJ, Duraffour S, Simpson JT, Severi E, Cowley L, Bore JA, Koundouno R, Dudas  
41 469 G, Mikhail A, Ouédraogo N, Afrough B, Bah A, Baum JH, Becker-Ziaja B, Boettcher JP, Cabeza-  
42 470 Cabrerizo M, Camino-Sanchez A, Carter LL, Doerrbecker J, Enkirch T, Dorival IGG, Hetzelt N,  
43 471 Hinzmann J, Holm T, Kafetzopoulou LE, Koropogui M, Kosgey A, Kuisma E, Logue CH,  
44 472 Mazzarelli A, Meisel S, Mertens M, Michel J, Ngabo D, Nitzsche K, Pallash E, Patrono LV,  
45 473 Portmann J, Repits JG, Rickett NY, Sachse A, Singethan K, Vitoriano I, Yemanaberhan RL,  
46 474 Zekeng EG, Trina R, Bello A, Sall AA, Faye O, Faye O, Magassouba N, Williams CV, Amburgey  
47 475 V, Winona L, Davis E, Gerlach J, Washington F, Monteil V, Jourdain M, Bererd M, Camara A,  
48 476 Somlare H, Camara A, Gerard M, Bado G, Baillet B, Delaune D, Nebie KY, Diarra A, Savane Y,  
49 477 Pallawo RB, Gutierrez GJ, Milhano N, Roger I, Williams CJ, Yattara F, Lewandowski K, Taylor J,  
50 478 Rachwal P, Turner D, Pollakis G, Hiscox JA, Matthews DA, O'Shea MK, Johnston AM, Wilson  
51 479 D, Hutley E, Smit E, Di Caro A, Woelfel R, Stoecker K, Fleischmann E, Gabriel M, Weller SA,  
52 480 Koivogui L, Diallo B, Keita S, Rambaut A, Formenty P, Gunther S, Carroll MW. Real-time  
53 481 portable genome sequencing for Ebola surveillance. Nature. 2016. 530(7589):228-32 doi:  
54 482 10.1038/nature16996.

- 483 11. Gomez-Eichelmann MC, Levy-Mustri A, Ramirez-Santos J. Presence of 5-methylcytosine in  
1 484 CC(A/T)GG sequences (Dcm methylation) in DNAs from different bacteria. *J Bacteriol.* 1991.  
2 485 173(23):7692-4.  
3
- 4 486 12. Mikheyev AS, Tin MM. A first look at the Oxford Nanopore MinION sequencer. *Mol Ecol*  
5 487 *Resour.* 2014. 14(6):1097-102. doi: 10.1111/1755-0998.12324.  
6
- 7 488 13. Laver T, Harrison J, O'Neill PA, Moore K, Farbos A, Paszkiewicz K, Studholme DJ. Assessing  
8 489 the performance of the Oxford Nanopore Technologies MinION. *Biomol Detect Quantif.*  
9 490 2015. 1-8.  
10
- 11 491 14. Magi A, Semeraro R, Mingrino A, Giusti B, D'Aurizio R. Nanopore sequencing data analysis:  
12 492 state of the art, applications and challenges. *Brief Bioinform.* 2017. doi: 10.1093/bib/bbx062.  
13 493 Epub ahead of print.  
14
- 15 494 15. Rang FJ, Kloosterman WP, de Ridder J. From squiggle to basepair: computational approaches  
16 495 for improving nanopore sequencing read accuracy. *Genome Biol.* 2018. 19(1):90. doi:  
17 496 10.1186/s13059-018-1462-9.  
18
- 19 497 16. Senol Cali D, Kim JS, Ghose S, Alkan C, Mutlu O. Nanopore sequencing technology and tools  
20 498 for genome assembly: computational analysis of the current state, bottlenecks and future  
21 499 directions. *Brief Bioinform.* 2018. doi: 10.1093/bib/bby017. Epub ahead of print.  
22
- 23 500 17. Marinus MG. DNA methylation in *Escherichia coli*. *Annu Rev Genet.* 1987. 21:113-31.  
24
- 25 501 18. Jain M, Koren S, Miga KH, Quick J, Rand AC, Sasani TA, Tyson JR, Beggs AD, Dilthey AT, Fiddes  
26 502 IT, Malla S, Marriott H, Nieto T, O'Grady J, Olsen HE, Pedersen BS, Rhie A, Richardson  
27 503 H, Quinlan AR, Snutch TP, Tee L, Paten B, Phillippy AM, Simpson JT, Loman NJ, Loose M.  
28 504 Nanopore sequencing and assembly of a human genome with ultra-long reads. *Nat*  
29 505 *Biotechnol.* 2018. 36(4):338-345. doi: 10.1038/nbt.4060.  
30
- 31 506 19. Ebler J, Haukness M, Pesout T, Marshall T, Paten, B. Haplotype-aware genotyping from noisy  
32 507 long reads. *bioRxiv.* 2018. 293944. <https://doi.org/10.1101/293944>.  
33
- 34 508 20. Sarkozy P, Jobbágy Á, Antal P. Calling homopolymer stretches from raw Nanopore reads by  
35 509 analyzing k-mer dwell times. In: Eskola H., Väisänen O., Viik J., Hyttinen J. (eds) *EMBEC &*  
36 510 *NBC 2017. EMBEC 2017, NBC 2017. IFMBE Proceedings, 2018. vol 65. Springer, Singapore.*  
37
- 38 511 21. Loman NJ, Quick J, Simpson JT. A complete bacterial genome assembled de novo using only  
39 512 nanopore sequencing data. *Nat Methods.* 2015. 12(8):733-5. doi: 10.1038/nmeth.3444.  
40
- 41 513 22. Wick RR, Judd LM, Gorrie CL, Holt KE. Completing bacterial genome assemblies with  
42 514 multiplex MinION sequencing. *Microb Genom.* 2017. 3(10):e000132. doi:  
43 515 10.1099/mgen.0.000132.  
44
- 45 516 23. Bolger AM, Lohse M, Usadel B. Trimmomatic: A flexible trimmer for Illumina Sequence  
46 517 Data. *Bioinformatics.* 2014. 30(15):2114-20. doi: 10.1093/bioinformatics/btu170.  
47
- 48 518 24. Tewolde R, Dallman T, Schaefer U, Sheppard CL, Ashton P, Pichon B, Ellington M, Swift C,  
49 519 Green J, Underwood A. MOST: a modified MLST typing tool based on short read sequencing.  
50 520 *PeerJ.* 2016. 4:e2308. doi: 10.7717/peerj.2308.  
51
- 52 521 25. Langmead B, Salzberg SL. Fast gapped-read alignment with Bowtie 2. *Nat Methods.* 2012.  
53 522 9(4):357-9. doi: 10.1038/nmeth.1923.  
54
- 55 523 26. Li H, Handsaker B, Wysoker A, Fennell T, Ruan J, Homer N, Marth G, Abecasis G, Durbin R,  
56 524 1000 Genome Project Data Processing Subgroup. The Sequence alignment/map (SAM)  
57 525 format and SAMtools. *Bioinformatics.* 2009. 25(16):2078-9. doi:  
58 526 10.1093/bioinformatics/btp352.  
59  
60  
61  
62  
63  
64  
65

- 527 27. Ashton PM, Perry N, Ellis R, Petrovska L, Wain J, Grant KA, Jenkins C, Dallman TJ. Insight into  
1 528 Shiga toxin gene encoded by *Escherichia coli* O157 from whole genome sequencing. PeerJ.  
2 529 2015. 17. doi: 10.7717/peerj.739.
- 3  
4 530 28. Li H, Durbin R. Fast and accurate short read alignment with Burrows-Wheeler Transform.  
5 531 Bioinformatics. 2009. 25(14):1754-60. doi: 10.1093/bioinformatics/btp324.
- 6  
7 532 29. McKenna A, Hanna M, Banks E, Sivachenko A, Cibulskis K, Kernytzky A, Garimella K, Altshuler  
8 533 D, Gabriel S, Daly M, DePristo MA. The Genome Analysis Toolkit: a MapReduce frame- work  
9 534 for analyzing next-generation DNA sequencing data. Genome Res. 2010. 20(9):1297-303.  
10 535 doi: 10.1101/gr.107524.110.
- 11  
12 536 30. Dallman T Ashton P, Schafer U, Jironkin A, Painset A, Shaaban S, Hartman H, Myers R,  
13 537 Underwood A, Jenkins C, Grant K. SnapperDB: A database solution for routine sequencing  
14 538 analysis of bacterial isolates. Bioinformatics. 2018. doi: 10.1093/bioinformatics/bty212.
- 15  
16 539 31. De Coster W, D’Hert S, Schultz DT, Cruts M, Van Broeckhoven C. NanoPack: visualizing and  
17 540 processing long-read sequencing data. Bioinformatics. 2018. 34(15):2666-9. doi:  
18 541 10.1093/bioinformatics/bty149.
- 19  
20 542 32. Wick R. Unpublished. <https://github.com/rrwick/Porechop>.
- 21  
22 543 33. Wood DE, Salzberg SL. Kraken: ultrafast metagenomic sequence classification using exact  
23 544 alignments. Genome Biol. 2014. 15(3):R46. doi: 10.1186/gb-2014-15-3-r46.
- 24  
25 545 34. Page A, Keane J. Rapid multi-locus sequence typing direct from uncorrected long reads using  
26 546 Krocus. PeerJ. 2018. 6:e5233 doi: 10.7717/peerj.5233.
- 27  
28 547 35. Li H. Minimap2: fast pairwise alignment for long nucleotide sequences. Bioinformatics. 2018.  
29 548 doi: 10.1093/bioinformatics/bty191. Epub ahead of print.
- 30  
31 549 36. Milne I Stephen G, Bayer M, Cock PJ, Pritchard L, Cardle L, Shaw PD, Marshall D. Using Tablet  
32 550 for visual exploration of second-generation sequencing data. Briefings in Bioinformatics.  
33 551 2013. 14(2):193-202. doi: 10.1093/bib/bbs012.
- 34  
35 552 37. Croucher NJ, Page AJ, Connor TR, Delaney AJ, Keane JA, Bentley SD, Parkhill J, Harris SR.  
36 553 Rapid phylogenetic analysis of large samples of recombinant bacterial whole genome  
37 554 sequences using Gubbins. Nucleic Acids Res. 2014. 43(3):e15. doi: 10.1093/nar/gku1196.
- 38  
39 555 38. Stamatakis A. 2014. RAxML Version 8: A tool for Phylogenetic Analysis and Post-Analysis of  
40 556 Large Phylogenies. Bioinformatics. 2014. 30(9):1312-13. doi:  
41 557 10.1093/bioinformatics/btu033.
- 42  
43 558 39. Koren S, Walenz BP, Berlin K, Miller JR, Phillippy AM. 2017. Canu: scalable and accurate long-  
44 559 read assembly via adaptive k-mer weighting and repeat separation. Genome Res. 27(5):722-  
45 560 36. doi: 10.1101/gr.215087.116.
- 46  
47 561 40. Hunt M, Silva ND, Otto TD, Parkhill J, Keane JA, Harris SR. 2015. Circlator: automated  
48 562 circularization of genome assemblies using long sequencing reads. Genome Biol. 16(294):1-  
49 563 10. doi: 10.1186/s13059-015-0849-0.
- 50  
51 564 41. Wick RR, Judd LM, Gorrie CL, Holt KE. 2017. Unicycler: Resolving bacterial genome  
52 565 assemblies from short and long sequencing reads. PLoS Comput Biol. 13(6):e1005595. doi:  
53 566 10.1371/journal.pcbi.1005595.
- 54  
55 567 42. Walker BJ, Abeel T, Shea T, Priest M, Abouelliel A, Sakthikumar S, Cuomo CA, Zeng Q,  
56 568 Wortman J, Young SK, Earl AM. 2014. Pilon: an integrated tool for comprehensive microbial  
57 569 variant detection and genome assembly improvement. PLOS One. 9(11):e112963. doi:  
58 570 10.1371/journal.pone.0112963.

571 43. Bankevich A, Nurk S, Antipov D, Gurevich AA, Dvorkin M, Kulikov AS, Lesin VM, Nikolenko SI,  
1 572 Pham S, Prjibelski AD, Pyshkin AV, Sirotkin AV, Vyahhi N, Tesler G, Alekseyev MA, Pevzner  
2 573 PA. 2012. SPAdes: A new genome assembly algorithm and its applications to sigle cell  
3 574 sequencing. *J Comput Biol.* 19(5):455-77. doi: 10.1089/cmb.2012.0021.  
4  
5 575 44. Seemann T. 2014. Prokka: rapid prokaryotic genome annotation. *Bioinformatics.*  
6 576 30(14):2068-9. doi: 10.1093/bioinformatics/btu153.  
7  
8 577 45. Darling ACE, Mau B, Blattner FR, Perna NT. 2004. Mauve: Multiple alignment of conserved  
9 578 genomic sequence with rearrangements. *Genome Res.* 14(7):1394-403. doi:  
10 579 10.1101/gr.2289704.  
11  
12 580  
13  
14 581  
15 582  
16 583  
17  
18  
19  
20  
21  
22  
23  
24  
25  
26  
27  
28  
29  
30  
31  
32  
33  
34  
35  
36  
37  
38  
39  
40  
41  
42  
43  
44  
45  
46  
47  
48  
49  
50  
51  
52  
53  
54  
55  
56  
57  
58  
59  
60  
61  
62  
63  
64  
65

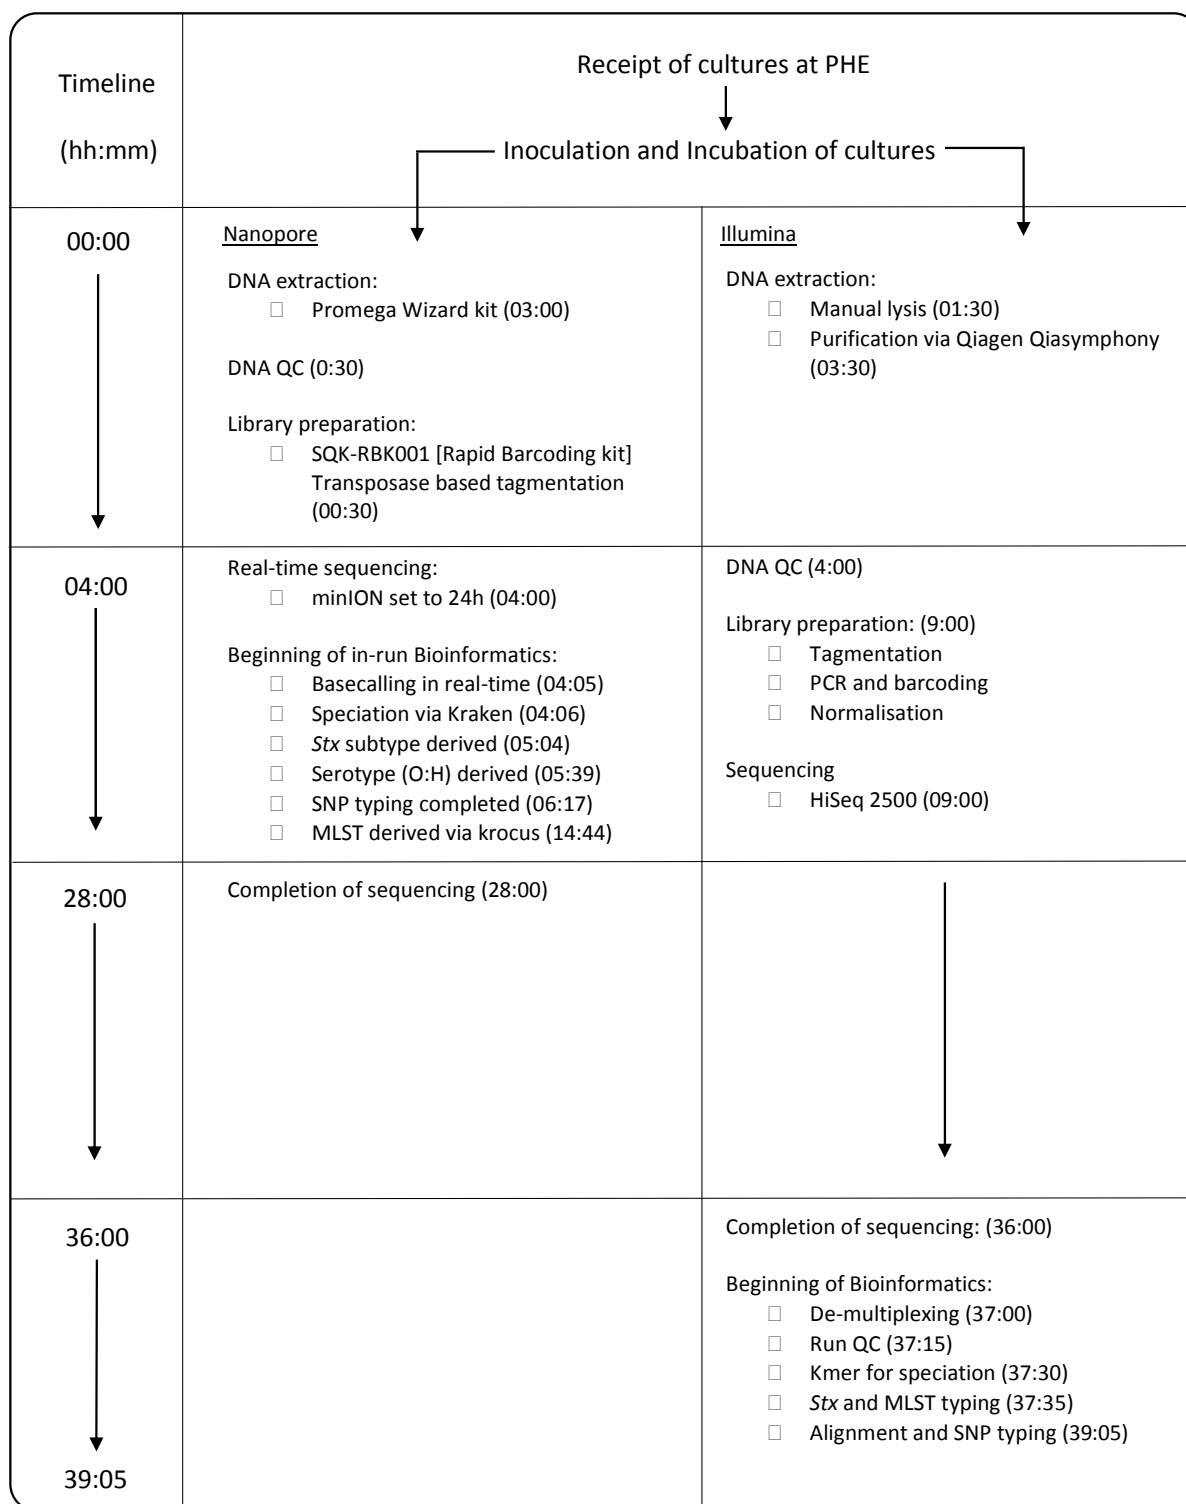

1  
2  
3  
4  
5  
6  
7

**Figure 1** – Figure showing comparative timeline from beginning DNA extraction to results generation for Oxford Nanopore and Illumina technologies. Times shown the completion of the labelled event relative to the start of the assay (hh:mm).

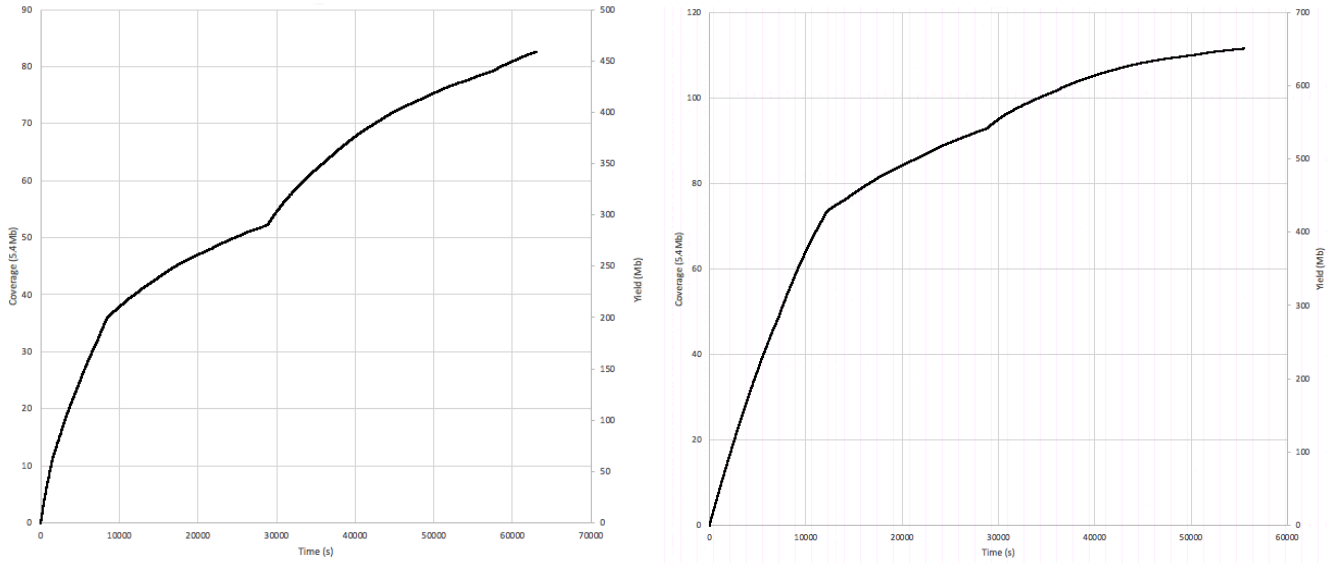

8 **Figure 2** – Two time/yield/coverage graphs showing production of reads in real-time and the  
 9 associated cumulative mapping coverage. Case A is the graph on the left and Case B is on the right.

10

11

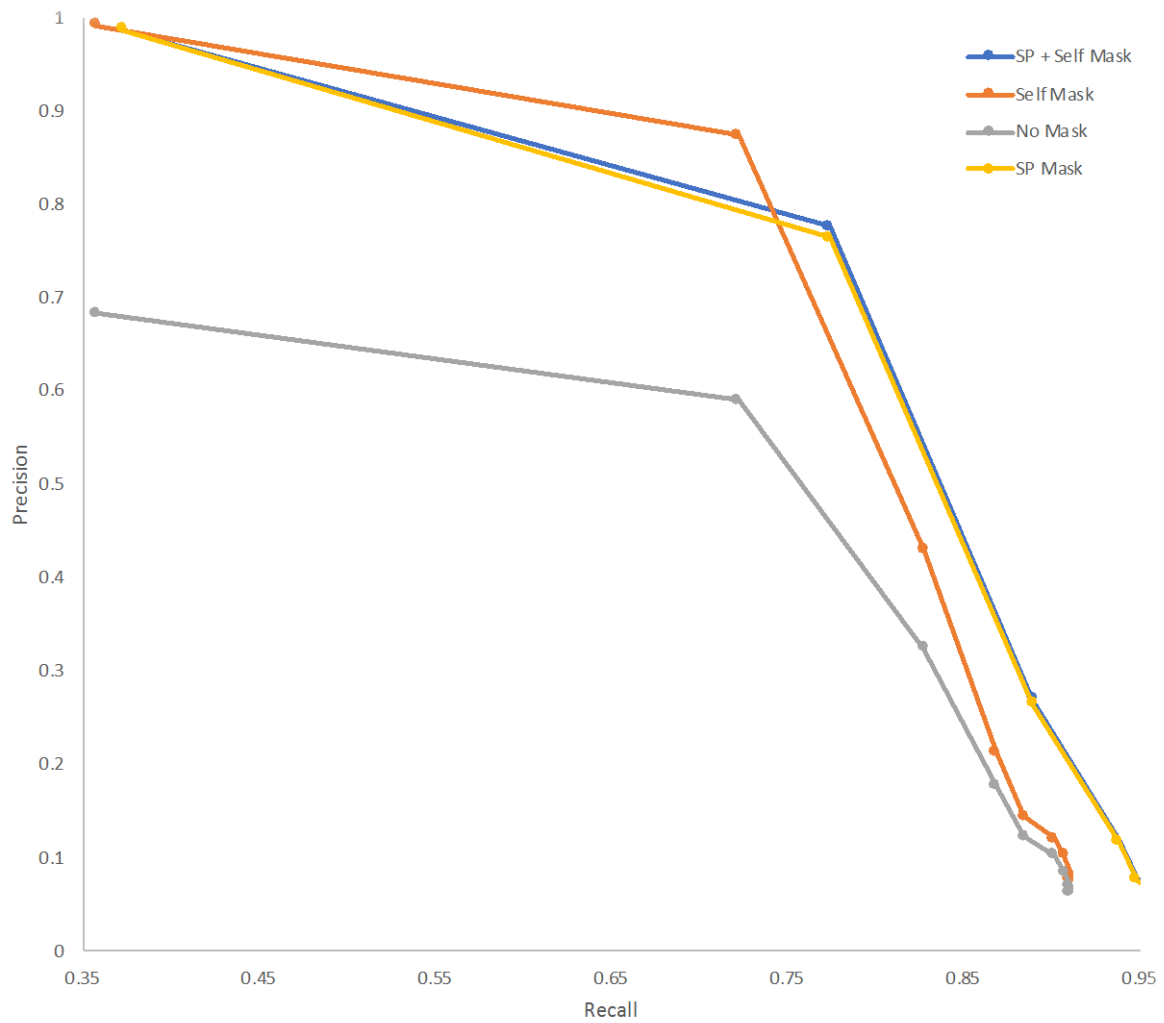

12

13 **Figure 3** – Precision Vs Recall of variant calling for an array of consensus ratio cut-offs and pre-  
 14 masking strategies including masking positions annotated as ‘Sakai phage’ (‘SP’) and positions that  
 15 are ambiguously self-mapped (‘Self’) with simulated Illumina FASTQs from the reference genome.  
 16 Performed on case B.



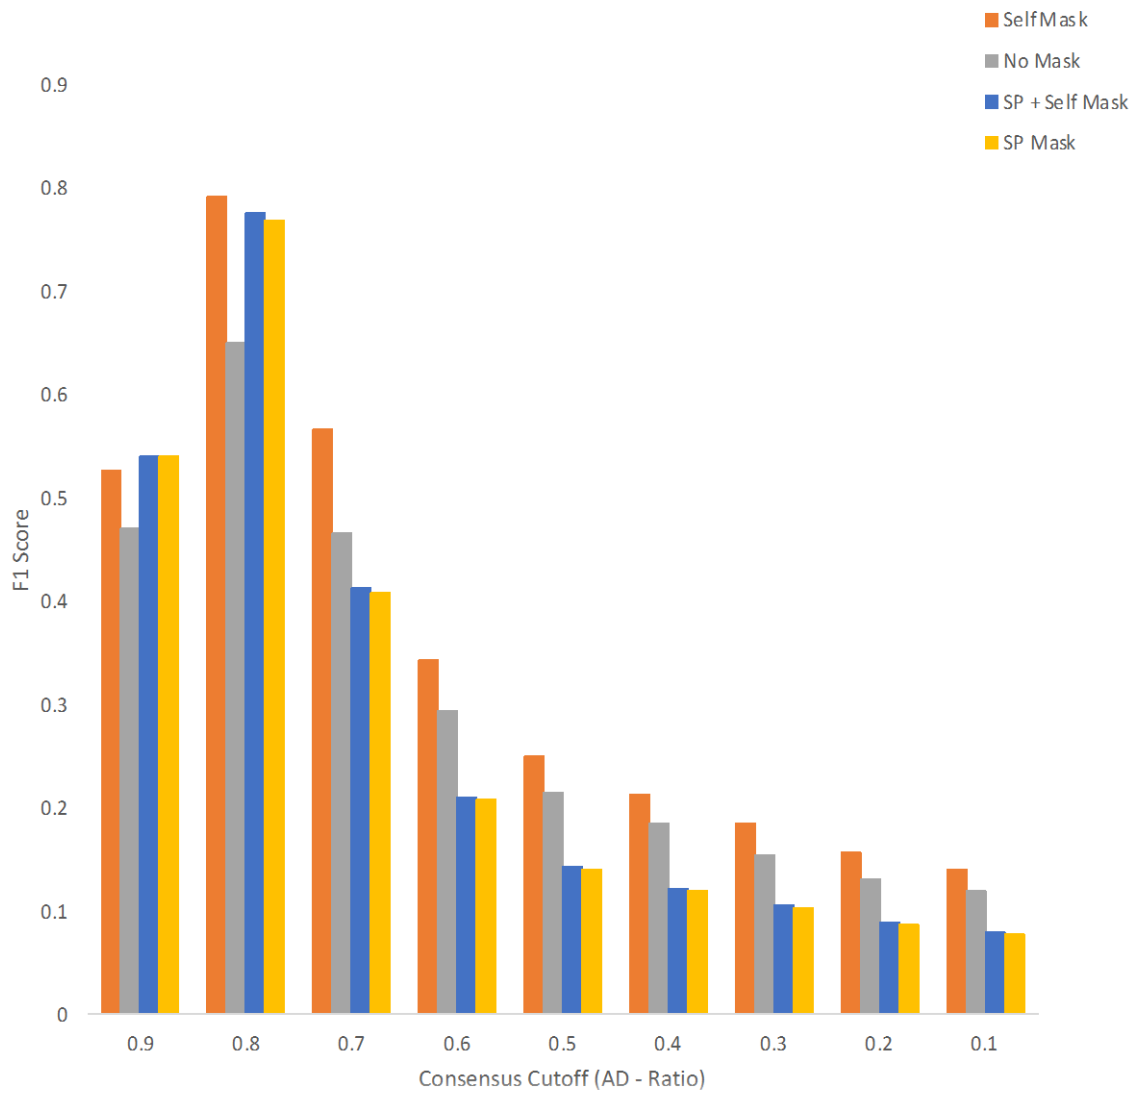

17

18

19 **Figure 4** – F1 Score for an array of consensus ratio cut-offs and pre-masking strategies including  
 20 masking positions annotated as ‘Sakai phage’ (‘SP’) and positions that are ambiguously self-mapped  
 21 (‘Self’) with simulated Illumina FASTQs from the reference genome.

22

23

|           | Position |    |         |    |    | Case                |                   |                  |
|-----------|----------|----|---------|----|----|---------------------|-------------------|------------------|
|           | -2       | -1 | Variant | +1 | +2 | A                   | B                 |                  |
| Reference | C        | C  | A       | G  | G  | A > G<br>Transition | 69.62%<br>(n=181) | 77.66%<br>(n=73) |
| Alignment | C        | C  | G       | =  | G  |                     |                   |                  |
| Reference | C        | C  | T       | G  | G  | T > C<br>Transition | 30.38%<br>(n=79)  | 22.34%<br>(n=21) |
| Alignment | C        | C  | C       | G  | G  |                     |                   |                  |
| Total     |          |    |         |    |    | 100%<br>(n=260)     | 100%<br>(n=94)    |                  |

24 **Figure 5** – Figure showing the two most common discrepancies in the ONT optimised GATK VCFs and  
 25 a breakdown of the relative proportions of these transitions compared to the total number of  
 26 discrepant SNPs for both cases.

27

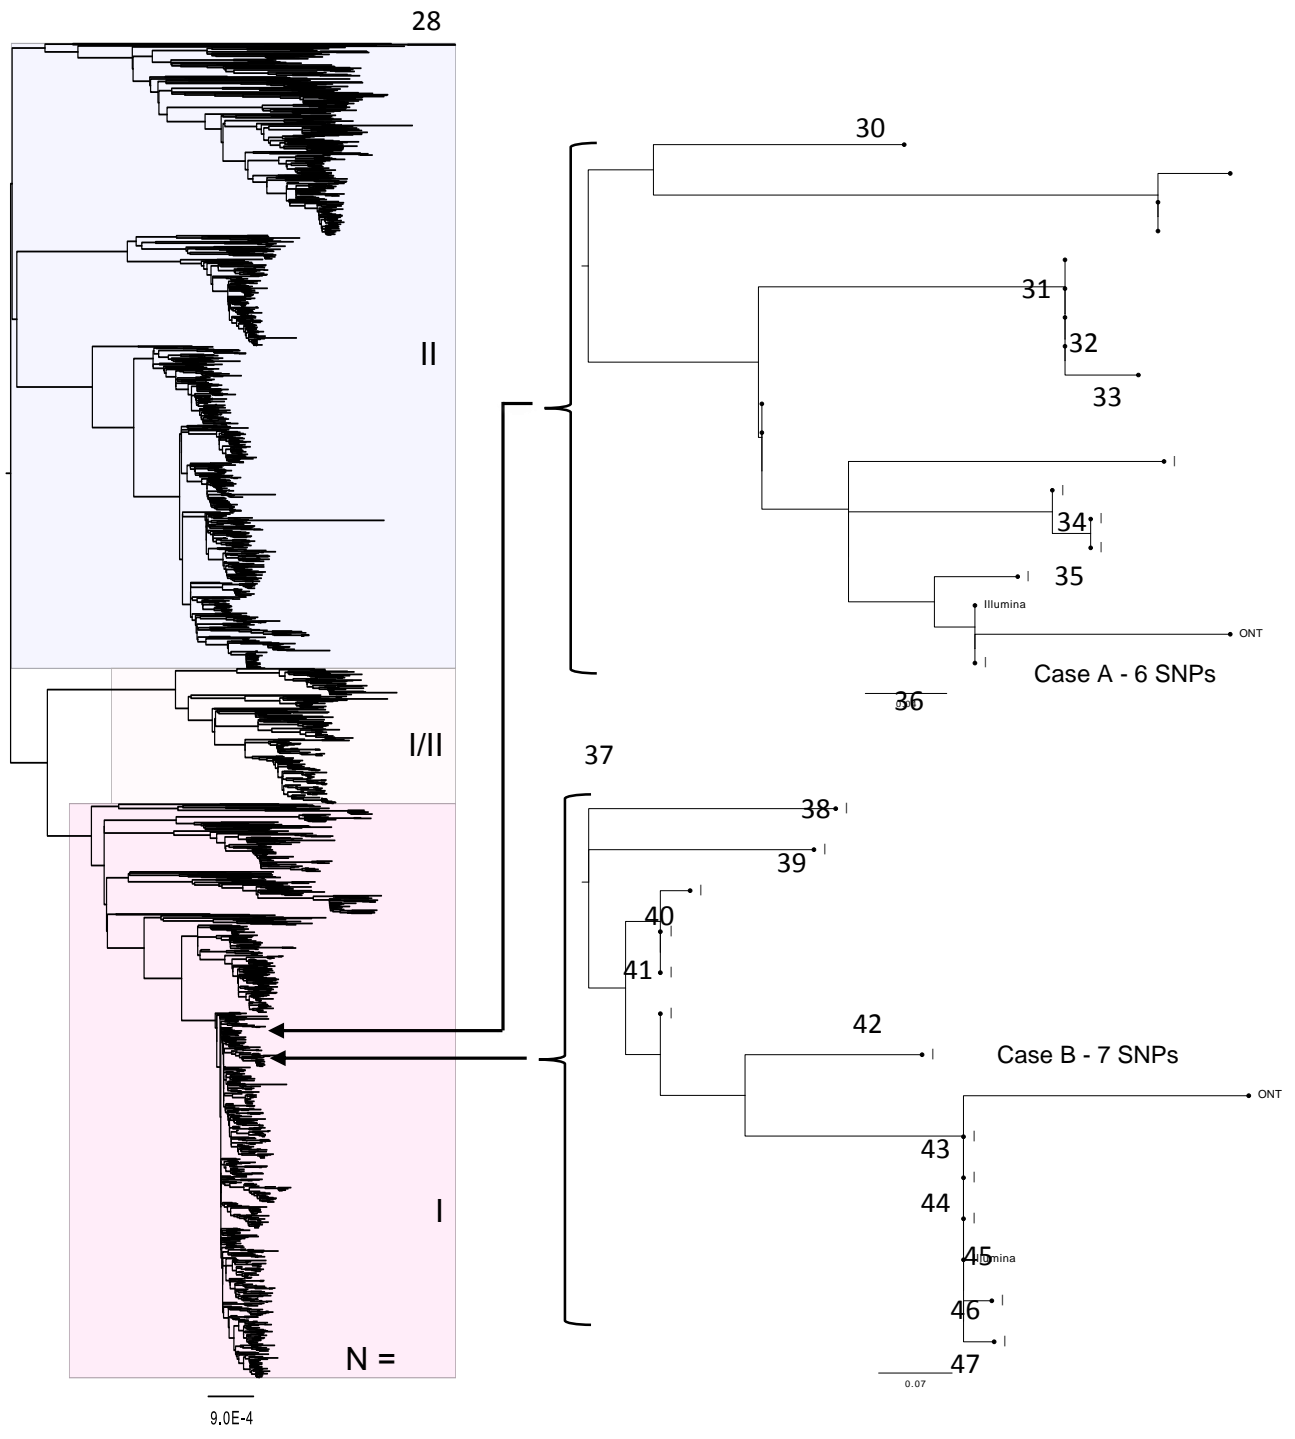

49

50 **Figure 6** – Maximum likelihood tree, of a “soft core” alignment of 4475 genomes showing the tree  
 51 lineages (I, I/II and II) of STEC (Clonal Complex 11). Also showing where Oxford Nanopore and  
 52 Illumina sequencing data is placed within the tree for each of the two cases. All methylated positions  
 53 and prophage regions have been masked.

54

55

56 **Supplementary Tables**

57

| Case | # of contigs in ONT-only assembly (size bp) | # of contigs in hybrid assembly (size bp) | # of contigs in Illumina-only assembly (size bp) |
|------|---------------------------------------------|-------------------------------------------|--------------------------------------------------|
| A    | 5 (5,725,666 bp)                            | 25 (5,506,670 bp)                         | 668 (5,449,735 bp)                               |
| B    | 4 (5,620,611 bp)                            | 34 (5,491,608 bp)                         | 575 (5,424,436 bp)                               |

58

59 **Table 1** – Table showing the number of contigs generated and size of assembly for each assembly  
60 method for both cases.

61

62

63

64

65

66

67

68

69

70

71

72

73

74

75

76

77

78

79 **Supplementary Figures**

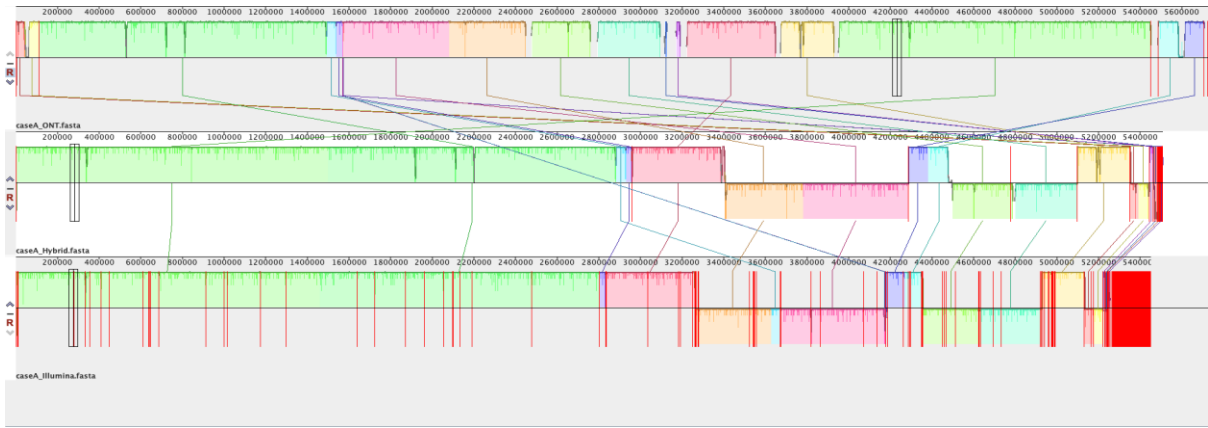

80

81 **Supplementary figure 1** – Mauve alignment showing regions of similarity between the ONT-only,  
82 hybrid and Illumina-only assemblies (order descending) for Case A. Also showing the chromosomal  
83 regions in the ONT-only assembly that did not match the other assemblies (red arrows).

84

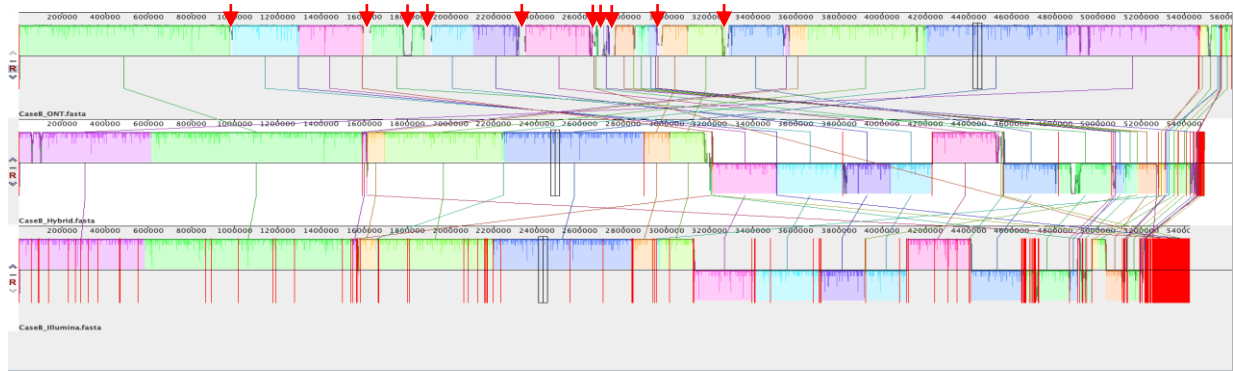

85

86 **Supplementary figure 2** – Mauve alignment showing regions of similarity between the ONT-only,  
87 hybrid and Illumina-only assemblies (order descending) for Case B. Also showing the chromosomal  
88 regions in the ONT-only assembly that did not match the other assemblies (red arrows).

89

90

91

92

93

94

95

96

97

Dear Editors,

Please find for consideration our manuscript “Comparison of single nucleotide variants identified by Illumina and Oxford Nanopore technologies in the context of a potential outbreak of Shiga Toxin Producing *Escherichia coli*”.

In this study we compare Illumina and Oxford Nanopore Technology (ONT) sequencing data from two isolates of STEC O157:H7, sequenced in a real-time public health setting, to determine whether concordant single nucleotide variants were identified and whether inference of relatedness was consistent with the two technologies.

For the ONT workflow *in silico* serotyping, Shiga toxin subtyping and variant identification for phylogenetic placement were available within seven hours. We show that with an appropriate optimisation strategy taking into account the higher error rate of ONT reads and the occurrence of miscalled modified bases, robust SNP typing using MinION-based variant calling is possible. After optimisation, the few discrepant variants (6 and 7 difference for the two isolates) identified by the two technologies are likely resultant of false calls by both methodologies.

In this manuscript we show that robust SNP typing using MinION-based variant calling is possible and we provide evidence that the two technologies can be used interchangeably to type STEC O157:H7 in a public health setting.

This paper provides evidence that ONT sequencing for routine public health microbiology is a viable approach in conjunction or as a replacement to Illumina sequencing.

Thankyou for considering our paper in GigaScience.

Kind regards,

Dr Timothy J Dallman

Public Health England
