# Supplementary material for: Comparison of single-nucleotide variants identified by Illumina and Oxford Nanopore technologies in the context of a potential outbreak of Shiga toxin–producing Escherichia coli
Source: PubMed Central journal article supplement (PMC6703438; doi:10.1093/gigascience/giz104), 2019-08-21
Supplement: giz104_giga-d-19-00070_revision_1.pdf [file giz104_giga-d-19-00070_revision_1.pdf]

# GigaScience

## Comparison of single nucleotide variants identified by Illumina and Oxford Nanopore technologies in the context of a potential outbreak of Shiga Toxin Producing *Escherichia coli* --Manuscript Draft--

|                                                      |                                                                                                                                                                                                                                                                                                                                                                                                                                                                                                                                                                                                                                                                                                                                                                                                                                                                                                                                                                                                                                                                                                                                                                                                                                                                                                                                                                                                                                                                 |                |
|------------------------------------------------------|-----------------------------------------------------------------------------------------------------------------------------------------------------------------------------------------------------------------------------------------------------------------------------------------------------------------------------------------------------------------------------------------------------------------------------------------------------------------------------------------------------------------------------------------------------------------------------------------------------------------------------------------------------------------------------------------------------------------------------------------------------------------------------------------------------------------------------------------------------------------------------------------------------------------------------------------------------------------------------------------------------------------------------------------------------------------------------------------------------------------------------------------------------------------------------------------------------------------------------------------------------------------------------------------------------------------------------------------------------------------------------------------------------------------------------------------------------------------|----------------|
| <b>Manuscript Number:</b>                            | GIGA-D-19-00070R1                                                                                                                                                                                                                                                                                                                                                                                                                                                                                                                                                                                                                                                                                                                                                                                                                                                                                                                                                                                                                                                                                                                                                                                                                                                                                                                                                                                                                                               |                |
| <b>Full Title:</b>                                   | Comparison of single nucleotide variants identified by Illumina and Oxford Nanopore technologies in the context of a potential outbreak of Shiga Toxin Producing <i>Escherichia coli</i>                                                                                                                                                                                                                                                                                                                                                                                                                                                                                                                                                                                                                                                                                                                                                                                                                                                                                                                                                                                                                                                                                                                                                                                                                                                                        |                |
| <b>Article Type:</b>                                 | Research                                                                                                                                                                                                                                                                                                                                                                                                                                                                                                                                                                                                                                                                                                                                                                                                                                                                                                                                                                                                                                                                                                                                                                                                                                                                                                                                                                                                                                                        |                |
| <b>Funding Information:</b>                          | Oxford Nanopore Technologies                                                                                                                                                                                                                                                                                                                                                                                                                                                                                                                                                                                                                                                                                                                                                                                                                                                                                                                                                                                                                                                                                                                                                                                                                                                                                                                                                                                                                                    | Not applicable |
| <b>Abstract:</b>                                     | <p><b>Background</b><br/>We aimed to compare Illumina and Oxford Nanopore Technology (ONT) sequencing data from the two isolates of STEC O157:H7 to determine whether concordant single nucleotide variants were identified and whether inference of relatedness was consistent with the two technologies.</p> <p><b>Results</b><br/>For the Illumina workflow, the time from DNA extraction to availability of results, was approximately 40 hours in comparison to the ONT workflow where serotyping, Shiga toxin subtyping variant identification were available within seven hours. After optimisation of the ONT variant filtering, on average 95% of the discrepant positions between the technologies were accounted for by methylated positions found in the described 5-Methylcytosine motif sequences, CC(A/T)GG. Of the few discrepant variants (6 and 7 difference for the two isolates) identified by the two technologies, it is likely that both methodologies contain false calls.</p> <p><b>Conclusions</b><br/>Despite these discrepancies, Illumina and ONT sequences from the same case were placed on the same phylogenetic location against a dense reference database of STEC O157:H7 genomes sequenced using the Illumina workflow. Robust SNP typing using MinION-based variant calling is possible and we provide evidence that the two technologies can be used interchangeably to type STEC O157:H7 in a public health setting.</p> |                |
| <b>Corresponding Author:</b>                         | Timothy Dallman<br><br>UNITED KINGDOM                                                                                                                                                                                                                                                                                                                                                                                                                                                                                                                                                                                                                                                                                                                                                                                                                                                                                                                                                                                                                                                                                                                                                                                                                                                                                                                                                                                                                           |                |
| <b>Corresponding Author Secondary Information:</b>   |                                                                                                                                                                                                                                                                                                                                                                                                                                                                                                                                                                                                                                                                                                                                                                                                                                                                                                                                                                                                                                                                                                                                                                                                                                                                                                                                                                                                                                                                 |                |
| <b>Corresponding Author's Institution:</b>           |                                                                                                                                                                                                                                                                                                                                                                                                                                                                                                                                                                                                                                                                                                                                                                                                                                                                                                                                                                                                                                                                                                                                                                                                                                                                                                                                                                                                                                                                 |                |
| <b>Corresponding Author's Secondary Institution:</b> |                                                                                                                                                                                                                                                                                                                                                                                                                                                                                                                                                                                                                                                                                                                                                                                                                                                                                                                                                                                                                                                                                                                                                                                                                                                                                                                                                                                                                                                                 |                |
| <b>First Author:</b>                                 | David R Greig                                                                                                                                                                                                                                                                                                                                                                                                                                                                                                                                                                                                                                                                                                                                                                                                                                                                                                                                                                                                                                                                                                                                                                                                                                                                                                                                                                                                                                                   |                |
| <b>First Author Secondary Information:</b>           |                                                                                                                                                                                                                                                                                                                                                                                                                                                                                                                                                                                                                                                                                                                                                                                                                                                                                                                                                                                                                                                                                                                                                                                                                                                                                                                                                                                                                                                                 |                |
| <b>Order of Authors:</b>                             | David R Greig<br>Claire Jenkins<br>Saheer Gharbia<br>Timothy J Dallman                                                                                                                                                                                                                                                                                                                                                                                                                                                                                                                                                                                                                                                                                                                                                                                                                                                                                                                                                                                                                                                                                                                                                                                                                                                                                                                                                                                          |                |
| <b>Order of Authors Secondary Information:</b>       |                                                                                                                                                                                                                                                                                                                                                                                                                                                                                                                                                                                                                                                                                                                                                                                                                                                                                                                                                                                                                                                                                                                                                                                                                                                                                                                                                                                                                                                                 |                |
| <b>Response to Reviewers:</b>                        | <p>Reviewer reports:</p> <p>Reviewer #1: This manuscript describes a comparative analysis of Illumina and Nanopore sequencing, evaluating their usefulness for phylogenetic analysis, and for</p>                                                                                                                                                                                                                                                                                                                                                                                                                                                                                                                                                                                                                                                                                                                                                                                                                                                                                                                                                                                                                                                                                                                                                                                                                                                               |                |

identifying genetic variants in outbreak situations.

The outcome of the research is somewhat surprising, given the expectation that Illumina sequencing represents the current gold-standard in sequencing accuracy. When eliminating systematic variation in base sequences caused by methylation, Nanopore sequencing appears to have similar accuracy to Illumina sequencing for the purpose of variant categorisation. When methylation is considered as an important feature, Nanopore sequencing demonstrates both a greater detection ability, and a faster turnaround time compared to Illumina sequencing. I am pleased to note that the supporting data was available at the time I carried out my review, and also pleased to be given the opportunity to approve this manuscript for publication.

I was specifically asked by the editors to state whether this represents "the state-of-the-art in terms of what this platform can do." It would be underselling the impact of these results to say no, that the current basecalling technology is better than what is presented in this paper. Due to the rapid advancement of nanopore sequencing technology in hardware, software, and chemistry, the yield and quality of results obtained from nanopore sequencing will be better than what is in \*any\* publication, even at the time when a manuscript is submitted for review.

I recall seeing (and commenting) on David, Claire, Kathie, and Timothy's poster presented in April 2018, which seems to have been a similar (if not the same) study [<https://twitter.com/gingerdavid92/status/987947325086666753>]. This was the first study I'd seen that explicitly compared Illumina and Nanopore sequencing for phylogenetics [I accept there may be others that I haven't seen], and I'm pleased to see that they have incorporated an explicit analysis of methylation signals since then.

People have previously looked at phylogenetic trees for outbreak tracking with Nanopore sequencing (e.g. <https://doi.org/10.2807%2F1560-7917.ES.2018.23.12.17-00140> [essentially cited in ref#10]), at accuracy estimates for Nanopore basecalling (e.g. <https://doi.org/10.1101/543439>), at hybrid isolate assembly from barcoded Nanopore and Illumina reads (e.g. <https://doi.org/10.1099%2Fmgen.0.000132> [cited]), and at comparing clinical turnaround time for Nanopore vs Illumina (e.g. <https://doi.org/10.1128/JCM.02483-16>), but this paper puts it all together into something that is still of substantial interest to the research community, as demonstrated by the social media impact of their preprint (<https://doi.org/10.1101/570192>).

In short, this manuscript is an excellent demonstration of what nanopore sequencing is capable of, represents the state-of-the-art (as I understand it) for public health investigations as presented in published papers, and I look forward to seeing more studies like this in the future.

Additional comments / questions:

1.Results, Tables 1/2 line 194-200 - Could you please either add in the legend that these SNPs were homoplasmic (very unlikely for ONT, somewhat possible for Illumina), or add the depth of the reference SNP bases to the table?

We have added the depth of sequencing for the final discrepant SNPs in to Table 2. We have identified what SNPs in the were homoplasmic (5/7 Illumina variants) and a line in the text.

2.Methods, line 348 - These were barcoded reads that were processed through Porechop, which I understand can identify and filter out chimeric reads. Do you know how many reads were chimeric (we've typically observed <0.5% chimeric reads from rapid adapter preps, about 4% from ligation preps)?

We have added a line in the methods with these figures.

3. Discussion, line 239 - It is interesting to see from Figure 1 that all the nanopore data analysis was completed before the sequencing run had ended. Maybe this could be emphasised here: "within 377 minutes (i.e. over 20 hours \*before\* the sequencing run was scheduled to finish)."

We have added a short statement emphasising the difference between technologies.

4. Discussion, lines 250-259 - The final sentence doesn't seem to match the general idea of this paragraph. The paragraph is about single-base accuracy for single molecules (note: Illumina never sequences a single molecule to generate a base call), whereas the last sentence is about phylogenetics. I'd be happier if this paragraph were deleted entirely, as phylogenetics and error are also discussed in the next paragraph.

We have removed the last sentence from this paragraph. We think it is important to keep the current limitations to show what was state of the art at the time of this publication

5. Discussion, line 283 - "long reads... workflow is" -> "longreads... workflow are"

This has now been corrected.

6. Discussion, line 303 - "up-dates" -> "updates"

This has now been corrected.

7. Figure 1 - Why were different methods used for DNA extraction (i.e. Promega Wizard vs Manual lysis / Qiagen Qiasymphony)?

The Qiasymphony utilises a magnetic beads in beating protocol that causes DNA fragmentation leading to a decrease in high molecular weight DNA molecules and thereby sub-optimal for long read sequencing. Therefore, a commercial gDNA extraction kit with modifications to attempt to keep the DNA integrity as high as possible and thus generate longer reads. We have added a sentence in the text to reflect the motivation of DNA extraction method.

8. Figure 2 - The numbers are difficult to read. Could the axis text be made larger?

We have enlarged the text for the axis for both graphs in Figure 2.

9. Figure 4 - This should be a line graph (similar to figure 3). The points represent sampling of potential cutoff scores along a continuous distribution, and the score represents a single value rather than count data.

We have modified the figure accordingly

10. Figure 5 - Table 1 (Line 165-166) mentions that the total number of discrepant variants for case A and B is 266 and 101 respectively. This doesn't match the percentages and totals represented in Figure 5. I would expect that the Total line for A/B in Figure 5 should be 97.7% and 93% respectively, indicating that transitions comprised that proportion of the total variants. It would be useful to refer back to Tables 1 & 2 in the text for the other discrepant variants.

We have clarified this in the legend in figure 5. In table 1 we are showing the total number of discrepant positions within both Illumina and ONT vcfs, however in figure 5 we are discussing only the variant positions in the ONT data alone that were determined to be methylated. Figure 5 should equate to the row titled '# of discrepant variants with methylated positions masked' in Table 1.

11. Figure 6 - What do the numbers represent? It is not clear from the figure legend. These are presumably not bootstrap values, as they have a consistent ordering from top to bottom.

These values represent each respective case's SNP differences between the Illumina

and ONT as demonstrated on the tree. We have updated the figure (6) legend to now include this clarification.

General questions:

Given that the Nanopore technology has improved in a number of different areas since this investigation was carried out (e.g. 9.4.1 Series D Flow cells, Field sequencing kit and/or RBK004, flip-flop basecaller), what (if anything) would be done differently if you had the opportunity to do this again?

Of your suggestions, the only one likely to make a significant difference would be re-basecalling with the most up to date flip-flop basecaller, we would hypothesise that this would reduce the number of SNP differences if it accounts for methylation better than previous basecalling algorithms. Another advancement is the new R10 pores which aims to improve the consensus accuracy is about 99.999% which again would reduce the number of total SNP differences but will most likely not account for methylation (unless a trained basecaller is also developed with these pores to account for methylation).

Are the assemblies available? I can't see anything about the assemblies in the "Availability" section.

We have now uploaded our assemblies to NCBI and have added a comment (with accession numbers) in the "Availability of supporting data" section (lines 409-416).

Reviewer #2: In their paper, Greig et al. compare the performance of Oxford Nanopore Technology (ONT) and Illumina sequencing in identifying, subtyping and classifying clinical isolates in the context of outbreak investigation. This study is of considerable interest to both research and medical communities in two key aspects. Firstly, it provides an in-depth assessment of the performance of ONT versus the current sequencing standard Illumina Technology, and identifies the main mechanistic reason for discrepancies between the technologies (DNA methylation), which would be of value in optimizing and improving Nanopore analysis workflows. Secondly, they demonstrate that their real-time ONT analysis pipeline is able to rapidly provide diagnostic calls (species identification, serotyping etc) with comparable accuracy to Illumina sequencing in a fraction of the time, which has major potential applications in outbreak investigation.

Given the utility of this study, I would be happy to recommend it for publication - please consider the following points to possibly improve it further.

1) Are the methods appropriate to the aims of the study, are they well described, and are necessary controls included?

1. The sample size of 2 isolates is small, but justified given the context of the study (2 urgent cases of children with HUS admitted to the same hospital on the same night). However, if the authors have any other isolates sequenced (in particular, a reference isolate closely related to the reference genome) that allow for the comparison of Illumina/ONT, they could include it as supplemental information to improve the robustness of their assessment.

Currently we have only processed these two STEC O157:H7 samples using this methodology, we are hoping to follow up this manuscript in the future on a larger set of samples.

2. Run parameters for bioinformatics tools are well optimized and described. It would also be of major help to the community if the authors are willing to share the code for their real-time analysis pipeline.

Each component/tool was run individually during this study. We have not developed an automated pipeline though this is something we plan to develop in the future.

3. The authors adequately discuss the limitations of ONT relative to Illumina sequencing

with respect to their application in rapid diagnosis.

Fig 1/Methods - In the comparison of the ONT/Illumina workflows, we note that two different DNA extraction methods are used (manual + QiaSymphony cleanup for Illumina, Promega Wizard Genomic DNA Purification for ONT). Are the methods interchangeable for the purposes of the workflow?

See point 7 for reviewer 1

2) Are the conclusions adequately supported by the data shown?

Analyses are generally robust and well-supported, but we would like clarification on the following points:

4.Line 214 - When comparing the case B ONT sequence with the 3 concurrent outbreak isolates, was it compared against Illumina sequences, or Nanopore sequences? If the comparison was between ONT and Illumina sequences, the discordance might arise from differences in the base-calling/software methods, and might disappear if all isolates were sequenced with ONT and compared directly (or would the high error rate preclude a valid comparison?) Please clarify and comment.

The outbreak case B sequenced via ONT was compared to Illumina sequenced isolates (and the equivalent case B sample sequenced via Illumina). We believe that the observed differences are inherent errors in both technologies. Our hypothesis is in agreement with yours, that comparing ONT to ONT sequenced outbreak strains would remove these discrepancies.

5.Line 216-218 - Given that 7 SNPs is not too dramatic a difference one could still make the case that the cases are quite plausibly linked. Would you be able to set an approximate SNV threshold for concluding genetic linkage?

Currently we use 5 SNPs as a proxy to infer genetic linkage or sharing the same epidemiological source with Illumina sequenced strains, through extensive validation from sequencing known outbreaks. With ONT sequencing and due to the lack of background sequenced samples we are unable to comment on an "appropriate" SNP threshold. We would have to take into account comparing ONT to Illumina data, Illumina to Illumina data and ONT to ONT data to decide if each type of comparison requires a different threshold or if we could set a general one to cover all comparisons.

3) Please indicate the quality of language in the manuscript. Does it require a heavy editing for language and clarity?

6.The language of the manuscript is quite clear. Please correct "manufactures instructions" to "manufacturer's instructions".

This has now been corrected at each use.

7.I also feel that the title of the manuscript downplays the speed and relative accuracy of the ONT diagnostic pipeline - the focus of the title should not be on the comparison of SNVs, but rather the comparison of the overall performance of the two methods. A title reflecting this and highlighting the rapid, real-time analysis capability of ONT-based diagnostics would be able to better capture reader interest and increase the impact of the manuscript.

8.Similarly, the abstract should be edited to emphasize the speed and real-time analysis capability.

We feel that the current title is appropriate for this study as the emphasis was that in conjunction with the nanopore being a rapid, real-time portable sequencer the current dogma is that variant calling is currently out of scope for this technology due to the high error rate. This manuscript refutes that dogma.

4) Are you able to assess all statistics in the manuscript, including the appropriateness of statistical tests used?

Yes - our group has experience analysing similar datasets. The precision/recall analysis performed is straightforward and appropriate.

(This manuscript was co-reviewed with Weizhen Xu, a postdoctoral fellow in my research group)

Reviewer #3: The authors examine the feasibility of using Nanopore sequencing to characterise single nucleotide variants in clinically relevant outbreaks. The authors present an interesting and relevant comparison of sequencing technologies given the rapid uptake of WGS as a clinical diagnostic tool. The data set is clearly described and accession code for all data submitted to the SRA are available in the manuscript and online. The methods are well described and all software/Bioinformatic tools are available online.

1. Although it can be addressed, my main concern with the manuscript is that the research was part funded by Oxford Nanopore. I believe the authors have not fully addressed the limitations of the Nanopore sequencing technology e.g. Cost, variability in throughput, etc. I have highlighted some of these issues below. Platform limitations will also need to be included in the discussion

We have been more explicit to the funding received by Oxford Nanopore in the Acknowledgments. We have a paragraph on the limitations of ONT sequencing in terms of read accuracy and therefore variant detection which is the focus of this paper.

2. In the abstract and results the authors make a comparison of Illumina and ONT workflows of the time taken from DNA extraction to availability of results. The authors state that typing data (Shiga toxin subtyping and serotyping) was available within 7 hours while with Illumina it took ~40 hours to get these results. How do these time frames compare to standard laboratory based typing techniques that might be available in a diagnostic/pathology lab?

This paper covers the comparison between current methods deployed in the national reference laboratory – WGS by Illumina – with an alternative sequencing methodology ONT. It is out of scope of the paper to consider methods deployed in diagnostics e.g PCR

3. I would like to see a comparison of the sequencing costs for Illumina and Nanopore sequencing. A comparison against standard laboratory based typing techniques might also be beneficial to a broader audience ( I leave that to the authors to decide).

Costing the sequencing technologies is not the focus of this paper and a would need to be a paper in its' own right considering labour / non-labour cost, deployment models etc. Also the value of such a comparison is incredibly time limited.

4. The authors state that the genetic relatedness of isolates could be determined at ~6 hours. I assume by genetic relatedness we are talking about variant/SNP typing. Can the authors explain how variants could be determined at 6 hours yet a MLST profile for Case B could not be determined until 10 hours had passed? Surely an inability to determine a MLST type indicates that the genome has not yet been sufficiently covered and it therefore unsuitable for variant typing.

Our SNP typing process requires an average genome coverage of 30x, the ONT sequencing took 6 hours to achieve this. As a result, as soon as 30x coverage is passed, this process can begin. Whereas, when sequencing the seven MLST genes, we are looking for enough coverage of those genes so that krocus can give us a confirmed result. This typically takes much longer, the last read was aligned to the seventh MLST gene at about 10 hours to then generate a full MLST result.

5. Additionally, in order to be cost effective multiple samples would need to be sequenced on the same flowcell at the same time. Can the authors comment on what impacted multiplexing might have on the time frames described here?

This is correct, it is standard to multiplex several isolates per flow-cell. The higher the degree of multiplexing the increased pore competition we would expect the time to

|                                                                                                                                                                                                                                                                                                                                                                                                                                    |                                                                                                                                                                                                                                                                                                                                                                                                                                                                                                                                                                                                                                                                                                                                                                                                                                                                                                                                                                                                                                                                                                                                                                                                                                                                                                                                                                                                                                                                                                                                                                                                                                                                                                                                                                                                                                                                                                                                                                                                                                                 |
|------------------------------------------------------------------------------------------------------------------------------------------------------------------------------------------------------------------------------------------------------------------------------------------------------------------------------------------------------------------------------------------------------------------------------------|-------------------------------------------------------------------------------------------------------------------------------------------------------------------------------------------------------------------------------------------------------------------------------------------------------------------------------------------------------------------------------------------------------------------------------------------------------------------------------------------------------------------------------------------------------------------------------------------------------------------------------------------------------------------------------------------------------------------------------------------------------------------------------------------------------------------------------------------------------------------------------------------------------------------------------------------------------------------------------------------------------------------------------------------------------------------------------------------------------------------------------------------------------------------------------------------------------------------------------------------------------------------------------------------------------------------------------------------------------------------------------------------------------------------------------------------------------------------------------------------------------------------------------------------------------------------------------------------------------------------------------------------------------------------------------------------------------------------------------------------------------------------------------------------------------------------------------------------------------------------------------------------------------------------------------------------------------------------------------------------------------------------------------------------------|
|                                                                                                                                                                                                                                                                                                                                                                                                                                    | <p>receive results per sample to increase. We have not performed this comparison. We have added this to the discussion</p> <p>6.Can the authors comment as to why a number of regions (all describes as prophage with the exception of 1 in case A) were only present in the ONT-only chromosome assemblies? I find it odd that these regions were not present in the Illumina sequence data and are also absent from the hybrid assembly. can the authors comment on why this might be the case and what impact that might have for genome sequencing and assembly strategies moving forward?</p> <p>The main reason for the smaller assemblies in the Illumina and hybrid approaches is the large amount of paralogous sequences in STEC O157 encoded on cryptic phage. These sequences (which are longer than the Illumina read length) collapse into a single contig or are broken up into many small contigs with only a single copy when in reality they are multi-copy in the genome. This results in smaller genomes when Illumina reads alone or as a hybrid.</p> <p>7.With regards to the genome assemblies of case A and Case B can the authors provide information on the number of erroneous indels that were present in the Nanopore assemblies? I assume these errors were polished out but did the authors only use Nanopore sequence data or was Illumina data also required.?</p> <p>To keep the comparison as true as possible we only polished the ONT assembly with ONT data using Nanopolish. It is difficult in this case to quantify how many of the indels associated in the ONT assembly are correct or conversely incorrect in the Illumina assembly as many fall in prophage regions.</p> <p>8.Line 129: Remove the MLST allele numbers</p> <p>This has now been corrected.</p> <p>9.Line 385: form -&gt; for(?)</p> <p>This has now been corrected.</p> <p>10.Table 1 is very hard to interrupt. Consider restructuring the table.</p> <p>We have reformatted the table to make the breakdown of SNPs clearer.</p> |
| <b>Additional Information:</b>                                                                                                                                                                                                                                                                                                                                                                                                     |                                                                                                                                                                                                                                                                                                                                                                                                                                                                                                                                                                                                                                                                                                                                                                                                                                                                                                                                                                                                                                                                                                                                                                                                                                                                                                                                                                                                                                                                                                                                                                                                                                                                                                                                                                                                                                                                                                                                                                                                                                                 |
| <b>Question</b>                                                                                                                                                                                                                                                                                                                                                                                                                    | <b>Response</b>                                                                                                                                                                                                                                                                                                                                                                                                                                                                                                                                                                                                                                                                                                                                                                                                                                                                                                                                                                                                                                                                                                                                                                                                                                                                                                                                                                                                                                                                                                                                                                                                                                                                                                                                                                                                                                                                                                                                                                                                                                 |
| Are you submitting this manuscript to a special series or article collection?                                                                                                                                                                                                                                                                                                                                                      | No                                                                                                                                                                                                                                                                                                                                                                                                                                                                                                                                                                                                                                                                                                                                                                                                                                                                                                                                                                                                                                                                                                                                                                                                                                                                                                                                                                                                                                                                                                                                                                                                                                                                                                                                                                                                                                                                                                                                                                                                                                              |
| <p><b>Experimental design and statistics</b></p> <p>Full details of the experimental design and statistical methods used should be given in the Methods section, as detailed in our <a href="#">Minimum Standards Reporting Checklist</a>. Information essential to interpreting the data presented should be made available in the figure legends.</p> <p>Have you included all the information requested in your manuscript?</p> | Yes                                                                                                                                                                                                                                                                                                                                                                                                                                                                                                                                                                                                                                                                                                                                                                                                                                                                                                                                                                                                                                                                                                                                                                                                                                                                                                                                                                                                                                                                                                                                                                                                                                                                                                                                                                                                                                                                                                                                                                                                                                             |



|                                                                                                                                                                                                                                                                                                                                                                                                                                                                                                                                                         |     |
|---------------------------------------------------------------------------------------------------------------------------------------------------------------------------------------------------------------------------------------------------------------------------------------------------------------------------------------------------------------------------------------------------------------------------------------------------------------------------------------------------------------------------------------------------------|-----|
| <p><b>Resources</b></p> <p>A description of all resources used, including antibodies, cell lines, animals and software tools, with enough information to allow them to be uniquely identified, should be included in the Methods section. Authors are strongly encouraged to cite <a href="#">Research Resource Identifiers</a> (RRIDs) for antibodies, model organisms and tools, where possible.</p> <p>Have you included the information requested as detailed in our <a href="#">Minimum Standards Reporting Checklist</a>?</p>                     | Yes |
| <p><b>Availability of data and materials</b></p> <p>All datasets and code on which the conclusions of the paper rely must be either included in your submission or deposited in <a href="#">publicly available repositories</a> (where available and ethically appropriate), referencing such data using a unique identifier in the references and in the “Availability of Data and Materials” section of your manuscript.</p> <p>Have you have met the above requirement as detailed in our <a href="#">Minimum Standards Reporting Checklist</a>?</p> | Yes |



[Click here to view linked References](#)

1 **Comparison of single nucleotide variants identified by Illumina and Oxford Nanopore technologies**  
2 **in the context of a potential outbreak of Shiga Toxin Producing *Escherichia coli*.**

3

4

5 David R Greig, Claire Jenkins, Saheer Gharbia & Timothy J Dallman\*.

6

7 National Infection Service, Public Health England, London, NW9 5EQ.

8 \*Corresponding author.

9

10

11 Author details:

12 David R Greig:

13 Email – David.Greig@phe.gov.uk

14 ORCID: 0000-0001-9436-067X

15

16 Claire Jenkins:

17 Email - Claire.Jenkins1@phe.gov.uk

18 ORCID: 0000-0001-8600-9169

19

20 Saheer Gharbia

21 Email – Saheer.Gharbia@phe.gov.uk

22

23 Timothy J Dallman:

24 Email - Tim.Dallman@phe.gov.uk

25 ORCID: 0000-0001-7105-2543

26

27 Keywords –Oxford Nanopore, Illumina, Variant calling, STEC, outbreak.

28

29

30 **Abstract**

31 **Background**

32 We aimed to compare Illumina and Oxford Nanopore Technology (ONT) sequencing data from the  
33 two isolates of STEC O157:H7 to determine whether concordant single nucleotide variants were  
34 identified and whether inference of relatedness was consistent with the two technologies.

35 **Results**

36 For the Illumina workflow, the time from DNA extraction to availability of results, was approximately  
37 40 hours in comparison to the ONT workflow where serotyping, Shiga toxin subtyping variant  
38 identification were available within seven hours. After optimisation of the ONT variant filtering, on  
39 average 95% of the discrepant positions between the technologies were accounted for by  
40 methylated positions found in the described 5-Methylcytosine motif sequences, CC(A/T)GG. Of the  
41 few discrepant variants (6 and 7 difference for the two isolates) identified by the two technologies, it  
42 is likely that both methodologies contain false calls.

43 **Conclusions**

44 Despite these discrepancies, Illumina and ONT sequences from the same case were placed on the  
45 same phylogenetic location against a dense reference database of STEC O157:H7 genomes  
46 sequenced using the Illumina workflow. Robust SNP typing using MinION-based variant calling is  
47 possible and we provide evidence that the two technologies can be used interchangeably to type  
48 STEC O157:H7 in a public health setting.

49

50

51

52

53 **Background**

54 Shiga toxin producing *Escherichia coli* (STEC) O157:H7 is a zoonotic, foodborne pathogen defined by  
55 the presence of phage-encoded Shiga toxin genes (*stx*) [1]. Disease symptoms range from mild  
56 through to severe bloody diarrhoea, often accompanied by fever, abdominal cramps and vomiting  
57 [2]. The infection can progress to Haemolytic Uremic Syndrome (HUS), characterized by kidney  
58 failure and/or cardiac and neurological complications [3,4]. Transmission from an animal reservoir,  
59 mainly ruminants, occurs by direct contact with animals or their environment, or by the  
60 consumption of contaminated food products with reported vehicles including beef and lamb meat,  
61 dairy products, raw vegetables and salad [2,4].

62  
63 STEC O157:H7 belongs to multi-locus sequence type clonal complex (CC) 11, with all but a small  
64 number of variants belonging to sequence type ST11. CC11 comprises three main lineages (I, II and  
65 I/II) and seven sub-lineages (Ia, Ib, Ic, IIa, IIb, IIc and I/II) [5]. There are two types of Shiga toxin, Stx1  
66 and Stx2. Stx1 has four subtypes (1a-1d) and Stx2 has seven subtypes (2a-2g). Subtypes 1a, 2a, 2c,  
67 and rarely 2d, are found in STEC O157:H7. Strains harbouring *stx2a* are significantly associated with  
68 cases that develop HUS [2,6]. As well as harbouring *stx* encoding prophage, STEC O157:H7 has an  
69 additional prophage repertoire accounting for at least 20% of the chromosome.

70  
71 The implementation of whole genome sequencing (WGS) data for typing STEC has improved the  
72 detection and management of outbreaks of foodborne disease [6]. Single nucleotide polymorphism  
73 (SNP) typing offers an unprecedented level of strain discrimination and can be used to quantify the  
74 genetic relatedness between groups of genomes. In general, for clonal bacteria, the fewer  
75 polymorphisms identified between pairs of strains, the less time since divergence from a common  
76 ancestor and therefore the increased likelihood that they are from the same source population.  
77 Therefore, it is paramount that variant detection for typing is accurate, highly specific and  
78 concentrated on positions of neutral evolution to ensure the correct interpretation of the sequence  
79 data within the epidemiological context of an outbreak. It has been previously shown that different  
80 bioinformatics analysis approaches for variant identification exhibit detection variability [7,8]. It is  
81 therefore important that within a particular analysis, workflow parameters to filter identified  
82 variants to achieve optimum sensitivity and specificity are appropriately optimised.

83  
84 Short read sequencing platforms, such as those provided by Illumina, have been adopted by public  
85 health agencies for infectious disease surveillance worldwide [9] and have proved to be a robust and  
86 accurate method for quantifying relatedness between bacterial genomes. High-throughput Illumina

87 sequencing although cost effective, often requires batch processing of hundreds of microbial isolates  
88 to achieve cost savings and therefore this approach offers less flexibility for urgent, small scale  
89 sequencing often required during public health emergencies [10]. In contrast, Oxford Nanopore  
90 Technologies (ONT) offers a range of rapid real-time sequencing platforms from the portable  
91 MinION to the higher throughput GridION and PromethION models, although at this time lower read  
92 accuracy compared to Illumina data suggests accurate variant calling maybe problematic.

93

94 In September 2017, Public Health England (PHE) was notified of two cases of HUS in two children  
95 admitted to the same hospital on the same night. STEC O157:H7 was isolated from the faecal  
96 specimens of both cases. In order to rapidly determine whether or not the cases were part of a  
97 related phylogenetic cluster and therefore likely to be epidemiologically linked to each other, or to  
98 any other cases in the PHE database, we sequenced both isolates using the MinION platform and  
99 integrated the ONT sequencing data with a dense reference database of Illumina sequences. We  
100 aimed to compare Illumina and ONT sequencing data from the two isolates to assess the utility of  
101 the ONT method for urgent, small scale sequencing, and to determine whether the same single  
102 nucleotide variants were identified and whether inference of relatedness was consistent with the  
103 two technologies.

104

#### 105 **Data description**

106 Paired-end FASTQ files were generated from the Illumina HiSeq 2500 for both samples (cases). Raw  
107 long-read data (FAST5) was generated from the MinION and basecalled using Albacore (FASTQ) in  
108 real-time. Both technologies derived FASTQ reads were trimmed and filtered (Trimmomatic,  
109 Porechop, Filtlong) before being aligned (BWA, Minimap2) to a reference genome (NC\_002695.1).  
110 Variant positions were called using GATK before being imported into SnapperDB. Full processing  
111 details can be found within the methods section.

112

#### 113 **Results**

##### 114 *Comparison of typing results generated by Illumina and ONT workflows*

115 To consider the potential benefits of real-time sequencing to enhance opportunities for early  
116 outbreak detection, the timelines from DNA extraction to result generation for Illumina and ONT  
117 workflows were evaluated (Figure 1) and the relationship between yield, time and genome coverage  
118 plotted (Figure 2). For the ONT workflow, the time from DNA extraction to completion of the  
119 sequencing run was 28 hours. A total yield of 0.45 Gbases for the isolate from Case A and 0.59  
120 Gbases for the isolate from Case B was achieved which corresponds to an equivalent coverage of the

121 Sakai O157 STEC reference genome (5.4Mb) of 81.29X and 108.30X for isolate A and B respectively.  
122 The average PHRED quality score for all reads in Case A was 9.87 and Case B was 9.47, which is  
123 approximately 1 error every 10 bases. Base-calling and analysis was performed in real-time and  
124 serotyping, Shiga toxin subtyping and variant identification were available within six hours and  
125 twenty minutes of the 24-hour sequencing run. With respect to the Illumina sequencing workflow,  
126 the time from DNA extraction to availability of results, assuming there were no breaks in the  
127 process, was just under 40 hours (Figure 1).

128

129 The species identification, serotype, MLST profile and Shiga toxin subtype results generated by both  
130 Illumina and ONT workflows were concordant with both isolates identified as *Escherichia coli*  
131 O157:H7 ST11, *stx2a* and *stx2c*. During the ONT sequencing run, the bacterial species was  
132 unambiguously identified in less than one minute for both cases (Figure 1). Additionally, using  
133 Krocus, a confirmed MLST was generated for Case A at 1:54 hours and Case B at 10:39 hours into the  
134 sequencing run. This was the point at which the last read required to generate a consensus on the  
135 MLST was base-called. By 93 minutes for Case A and 41 min for Case B, it was possible to determine  
136 the *E. coli* O157:H7 serotype, and *stx2a* and *stx2c* were detected at 58 and 24 minutes into the  
137 sequencing run for Case A and Case B, respectively.

138

### 139 *Optimisation of ONT variant calling*

140 To compare Illumina and ONT sequences within a standardised framework it was necessary to  
141 optimise the parameters for variant filtering within GATK2 to compensate for the lower read  
142 accuracy observed in the ONT data. Using Case B for the optimisation, base calls in the ONT data  
143 were classified as true positives (variant base detected by both methods), false positives (variant  
144 base in ONT, reference base in Illumina), true negatives (reference base in Illumina and ONT) or false  
145 negatives (variant base in Illumina, reference base in ONT). To disregard areas of the genome that  
146 the ONT reads could map to (and therefore identify variants) but were ambiguously mapped with  
147 Illumina reads, pre-filtering was performed by masking regions annotated as phage in the reference  
148 genome and those that could not be accurately self-mapped with simulated reference Illumina  
149 FASTQ reads. Figure 3 plots the precision (the proportion of true positives with respect to all  
150 positives calls) against the recall/sensitivity (the proportion of true positives identified with respect  
151 to all true positives) for an array of consensus ratio cut-offs for each of the masking strategies.  
152 Similar areas 'under the curve' were achieved for the different masking strategies with slightly  
153 higher precision at lower recall achieved with 'self-masking' (AUC – 0.71) and slightly higher recall at  
154 lower precision with explicit masking of the Sakai prophage (AUC – 0.75). The absence of a masking

155 strategy markedly affects the precision of variant calling with ONT data, in comparison of Illumina as  
 156 a gold standard (AUC – 0.30). To identify the optimum consensus cut-off for filtering ONT variants  
 157 processed through GATK the F1 score was calculated at each consensus cut-off. A consensus cut-off  
 158 of 0.8 maximised the precision and recall (Figure 4) irrespective of the filtering methods.

159

160 *Investigation of the discrepant variants identified between the Illumina and ONT data*

161 After optimised quality and prophage filtering there were 266 and 101 base positions for Cases A  
 162 and B respectively that were discordant between the ONT and Illumina sequencing data. The  
 163 majority of discrepancies were where the ONT data identified a variant not identified in the Illumina  
 164 data (261/266 (98.12%) and 95/101 (94.06%) discrepant base positions for Cases A and B  
 165 respectively). In contrast the Illumina data identified 5 (1.88%) discrepant base positions as variants  
 166 for Case A and 6 (5.94%) for case B (Table 1) not identified by the ONT data.

167

| Variants and reason for omission.                                        | Case A       |         | Case B       |         |
|--------------------------------------------------------------------------|--------------|---------|--------------|---------|
| Total # of variants against the reference genome post quality filtering. | 2076         |         | 1424         |         |
| Total # of variants with masked due to location in phage                 | 708          |         | 531          |         |
| Total # of discrepant variants called between case A and B alone.        | 266          |         | 101          |         |
| Variants and reason for omission.                                        | Illumina VCF | ONT VCF | Illumina VCF | ONT VCF |
| # of discrepant variants in each VCF.                                    | 5            | 261     | 6            | 95      |
| # of discrepant variants with methylated positions masked.               | 0            | 260     | 0            | 94      |
| Final discrepant variants.                                               | 5            | 1       | 6            | 1       |

168

169 **Table 1** – Table showing the breakdown of the total number of variants of each technology against  
 170 the reference genome, followed by the numbers of masked variants within prophage or methylated  
 171 positions.

172

173 For both cases the most common discrepant variant were adenines classified as guanines in the ONT  
 174 data with respect to the Illumina data (and reference), accounting for 68.05% (181/266) for Case A  
 175 and 72.28% (73/101) for Case B. The second most common discrepancy was thymine being  
 176 classified as cytosine in the ONT data accounting for 29.70% (79/266) in Case A and 22.80% (21/101)  
 177 in Case B (Table 1). Of the transitions described above, 97.74% (Case A) and 93.07% (Case B)  
 178 occurred when the variant was between two homopolymeric regions of multiple cytosines and  
 179 guanines (Figure 5). These homopolymeric regions were similar to described DNA cytosine  
 180 methylase (Dcm) binding sequences [11]. Nanopolish was subsequently used to identify likely Dcm,  
 181 5' – cytosine – phosphate – guanine – 3' (CpG) and DNA adenine methyltransferase (Dam)  
 182 methylation sites in the ONT sequencing data and confirmed 260/266 (97.74%) and 94/101 (93.07%)

183 discrepant variants in the ONT data were classed as methylated for Cases A and B respectively. All of  
 184 which were determined to be Dcm methylation for both cases.

185

186 Once the methylated positions were masked from the analysis, there were a total of 6 (5 discrepant  
 187 variants in Illumina and 1 ONT) and 7 (6 discrepant variants in Illumina and 1 ONT) discrepant SNPs  
 188 between the ONT and Illumina data, for Cases A and B respectively (Table 2 & 3). Four discrepant  
 189 Illumina variants are shared by both Case A and Case B. One shared variant was found in a non-  
 190 coding region, another shared variant was found in *rhsC* encoding an RHS (rearrangement hotspot)  
 191 protein defined by the presence of extended repeat regions. Two further shared variants were  
 192 found in *dadX*, an alanine racemase gene. *dadX* is a paralogue of *alr*, also annotated as an alanine  
 193 racemase in the *Sakai* reference genome with significant nucleotide similarity (>75% nucleotide  
 194 identity). Both intra and inter gene repeats are known to be regions of potential false positives calls  
 195 with Illumina data due to miss-mapping. Of the 7 variants in the Illumina data found in either or  
 196 both Case A and B, 5 were found to be homoplastic in the O157 population of 4475 illumina  
 197 sequences, arising independently, multiple times.

198

| SNP | Position  | BASE in Ref | BASE in Illum | Depth in Illum | BASE in ONT | Depth in ONT | Variant | Locus tag  | Annotation                                       |
|-----|-----------|-------------|---------------|----------------|-------------|--------------|---------|------------|--------------------------------------------------|
| 1   | 270,595   | C           | A             | 46             | C           | 141          | A       | ECs0237    | rhsC                                             |
| 2   | 379,516   | A           | G             | 114            | A           | 100          | G       | NON CODING | N                                                |
| 3   | 1,681,338 | C           | G             | 59             | C           | 61           | G       | ECs1685    | alanine racemase 2                               |
| 4   | 1,681,339 | G           | C             | 57             | G           | 61           | C       | ECs1685    | alanine racemase 2                               |
| 5   | 2,636,513 | T           | C             | 91             | T           | 69           | C       | ECs2674    | hypothetical protein                             |
| 6   | 4,709,195 | A           | A             | 86             | G           | 82           | G       | ECs4673    | membrane-bound ATP synthase epsilon-subunit AtpC |

199

200 **Table 2** – Table showing the final discrepant SNPs between the Illumina data and ONT data for case  
 201 A. Also shown is the base as it is in the reference, the Illumina called base and read depth at that  
 202 position and the same for the ONT data. Finally, also included is the locus tag relative to the  
 203 reference genome and the gene annotation.

204

| SNP | Position  | BASE in Ref | BASE in Illum | Depth in Illum | BASE in ONT | Depth in ONT | Variant | Locus tag  | Annotation           |
|-----|-----------|-------------|---------------|----------------|-------------|--------------|---------|------------|----------------------|
| 1   | 270,595   | C           | A             | 19             | C           | 207          | A       | ECs0237    | rhsC                 |
| 2   | 379,516   | A           | G             | 52             | A           | 124          | G       | NON CODING | N                    |
| 3   | 1,681,338 | C           | G             | 44             | C           | 86           | G       | ECs1685    | alanine racemase 2   |
| 4   | 1,681,339 | G           | C             | 41             | G           | 86           | C       | ECs1685    | alanine racemase 2   |
| 5   | 2,033,176 | T           | G             | 34             | T           | 85           | G       | ECs2049    | hypothetical protein |
| 6   | 2,731,621 | A           | C             | 52             | A           | 73           | C       | NON CODING | N                    |



205

206 **Table 3** – Table showing the final discrepant SNPs between the Illumina data and ONT data for case  
207 B. Also shown is the base as it is in the reference, the Illumina called base and read depth at that  
208 position and the same for the ONT data. Finally, also included is the locus tag relative to the  
209 reference genome and the gene annotation.

210

### 211 *Phylogenetic Analysis*

212 Using the optimised variant calling parameters both strains clustered phylogenetically in lineage Ic  
213 within a dense reference database of STEC O157:H7 genomes (n=4475). However, the genomes  
214 were located in distinct sub-clades (Figure 6). It was, therefore, unlikely that the isolates originated  
215 from the same source, and it was concluded that Cases A and B were not epidemiologically linked.  
216 Following phylogenetic analysis of the Illumina SNP typing data (Figure 6), Case A was designated a  
217 sporadic case. However, Case B clustered with a concurrent outbreak, already under investigation,  
218 comprising three additional cases. The Illumina sequence linked to Case B was zero SNPs different  
219 from the other three cases in the cluster, whereas the ONT sequence was 7 SNPs different, when  
220 excluding the methylated positions (Table 3). Based on the ONT sequencing data alone, this  
221 discrepancy would have led to uncertainty as to whether or not the Case B was linked to the  
222 outbreak.

223

### 224 *Assembly Profile*

225 The ONT-only assembly resolved to five contigs (5.73 mb) for Case A and four contigs (5.60 mb) for  
226 Case B (Supplementary Table 1). In Case A, the five contigs were determined to be a single  
227 chromosomal contig, a single plasmid contig (pO157) and the three prophage duplications. In Case B,  
228 the four contigs were determined to be a single chromosomal contig with two plasmids (one being  
229 the pO157). For Case A the assembly resolved to 25 contigs (5.51mb) with a hybrid assembly and  
230 668 contigs (5.45 mb) with an Illumina only assembly. Case B resolved to 34 contigs (5.49 mb) with a  
231 hybrid assembly and 575 contigs (5.42 mb) with an Illumina only assembly.

232

233 Alignment of the assemblies (Supplementary Figures 1 and 2) revealed several locations within the  
234 ONT-only assembly that there were absent in the hybrid and Illumina-only assemblies. In Case A,  
235 there were 8 regions only present within the ONT-only chromosome assembly, of which 7 are  
236 related to prophage regions (Supplementary Figure 1). In case B, there were 10 chromosomal  
237 regions in the ONT-only assembly that did not align to the other assemblies. All 10 regions were  
238 associated with prophage regions (Supplementary Figures 2).

239

240 **Discussion**

241 In this study, the two isolates sequenced using ONT were unambiguously identified as STEC O157:H7  
242 ST 11 *stx2a/stx2c* in less than 15 hours and it was possible to distinguish the genetic relatedness  
243 between the isolates within 377 minutes (i.e. 22 hours before the ONT sequencing run was scheduled to  
244 finish and just under three hours before the Illumina sequencing began.). The WGS turn-around time from  
245 DNA extraction and library preparation, to sequencing and analysis via the Illumina workflow at PHE,  
246 is three to six days. Although this turnaround time is rapid for a service utilising batch processing on  
247 the HiSeq platforms, the sequencing approach using the MinION, whereby individual samples or  
248 small barcoded batches are loaded and results generated and analysed in real-time, has the  
249 potential to be faster and more flexible. It should be noted that speed to result for ONT sequencing  
250 will be related to the amount of isolates run on a single flowcell as DNA molecules from different  
251 samples will compete to traverse a finite number of pores. This approach is therefore ideal for  
252 urgent, small scale sequencing, often required during public health emergencies. In this scenario,  
253 analysis of the ONT data provided evidence that the two cases were not epidemiologically linked  
254 and, although efforts were made to determine the potential source of the infection for both cases  
255 through the National Enhanced STEC Surveillance System [2], an outbreak investigation was not  
256 initiated.

257

258 A current limitation of MinION sequencing is its lower read accuracy when compared to short-read  
259 technologies [12,13,14,15,16]. This accuracy has improved as the technology has matured but still  
260 falls short of the 99% accuracy offered by short-read platforms [15]. There are a number of factors  
261 that contribute to the current read accuracy in the nanopore data including structural similarity of  
262 nucleotides, simultaneous influence of multiple nucleotides on the signal, the non-uniform speed at  
263 which nucleotides pass through the pore and the fact that the signal does not change within  
264 homopolymers [15].

265

266 Although analysis of the Illumina and ONT sequencing data placed the sequences on the same  
267 branch on the phylogeny, there were SNP discrepancies between the sequences generated by the  
268 two different workflows, even after optimisation of the parameters. The vast majority of the  
269 discrepant SNPs (261/266 – 98.12% and 95/101 – 94.06 % for Cases A and B respectively) were  
270 attributed to variants identified in the ONT data and not the Illumina data. The majority of  
271 discrepancies (97.74% in Case A and 93.07% in Case B) were found in sequences that are the same as  
272 the known 5-Methylcytosine motif sequences, CC(A/T)GG [11,17] in the ONT data. Following a

273 search of the ONT discrepant SNPs for CpG, Dam and Dcm methylation using Nanopolish, the  
274 majority (97.74% and 93.07% for case A and B respectively) of the ONT discrepant SNPs were  
275 identified in Dcm methylated regions.

276

277 As Nanopolish is detecting these methylated positions with the use of the raw FAST5 data, it is  
278 suggested that these particular discrepancies appear during the basecalling process. Albacore  
279 handles most methylation well across the three methylation models searched for by Nanopolish, for  
280 example only 94 out of 13,504 methylated positions were considered incorrect by base calling for  
281 Case B. However, for mapping based-SNP typing, this level of error in base calling means that it is  
282 not possible to accurately determine the number of SNPs, thus potentially obscuring the true  
283 phylogenetic relationship between isolates of STEC O157:H7.

284

285 The optimisation of variant filtering was performed using the Illumina data as a gold standard.  
286 However, it is possible that the alignment of the Illumina data might have generated false SNPs  
287 based on reads mapping to ambiguous regions of the genome, whereas the long reads obtained  
288 using the ONT workflow are able to resolve these ambiguous regions and call variants, or not, at  
289 these positions correctly. As the Illumina data was used as the gold standard, in this scenario SNPs  
290 produced in the Illumina data would have been classed incorrectly as false negatives in the ONT  
291 data. Discrepant variants identified in the Illumina data were attributed mainly to potentially false  
292 mapping of Illumina reads to homologous regions of the reference genome, variants which were  
293 misidentified at the same position independently in Case A and Case B. Furthermore, comparison of  
294 assemblies generated by ONT reads, Illumina reads and a hybrid approach highlights the extra  
295 genetic content accessible to ONT assemblies where variation can be quantified.

296

297 In this study an ONT sequencing workflow was used to rapidly rule out an epidemiological link  
298 between two children admitted to the same hospital on the same day with symptoms of HUS. The  
299 isolates of STEC O157:H7 from each child mapped to different clades within the same STEC O157:H7  
300 lineage (Ic). We provide further evidence that SNP typing using MinION-based variant calling is  
301 possible when the coverage of the variation is high [15]. The error rate exhibited by ONT sequencing  
302 workflows continue to improve due to developments in the pore design, the library preparation  
303 methods, innovations in base-calling algorithms and the introduction of post-sequencing correction  
304 tools, such as Nanopolish [15,21]. Currently, both short and long read technologies are used for  
305 public health surveillance, and there is a need to integrate the outputs so that all the data can be  
306 analysed in the same way. Recently, Rang et al [15] reiterated how the scientific community can

307 make valuable contributions to improving ONT read accuracy by systematically comparing  
308 computational strategies as highlighted in this study and elsewhere [22]. On-going updates to the  
309 chemistry and software tools will facilitate the robust detection of SNPs enabling ONT to compete  
310 with short read platforms, ultimately enabling the two technologies to be used interchangeably in  
311 clinical and public health settings.

312

## 313 **Methods**

### 314 *DNA extraction, Library preparation and Illumina Sequencing*

315 Genomic DNA was extracted from two strains of STEC O157 isolates from two HUS cases admitted to  
316 the same hospital on the same night. Using a Qiagen Qiasymphony (Qiagen, Hilden, Germany) to  
317 manufacture's instructions, genomic DNA extracted and quantified using a Qubit and the BR dsDNA  
318 Assay Kit (ThermoFisher Scientific, Waltham, USA) to manufacture's instructions. The sequencing  
319 library was prepared by fragmenting and tagging the purified gDNA using the Nextera XT DNA  
320 Sample Preparation Kits (Illumina, Cambridge, UK) to manufacture's instructions. The prepared  
321 library was loaded onto an Illumina HiSeq 2500 (Illumina, Cambridge, UK) at PHE and sequencing  
322 performed in rapid run mode yielding paired-end 100bp reads.

323

### 324 *Processing and analysis of Illumina sequence data*

325 FASTQ reads were processed using Trimmomatic v0.27 (Trimmomatic , RRID:SCR\_011848)[23] to  
326 remove bases with a PHRED score of less than 30 from the leading and trailing ends, with reads less  
327 than 50 bp after quality trimming discarded. A *k*-mer approach ([https://github.com/phe-](https://github.com/phe-bioinformatics/kmerid)  
328 [bioinformatics/kmerid](https://github.com/phe-bioinformatics/kmerid)) was used to confirm the species of the samples. Sequence type (ST)  
329 assignment was performed using MOST v1.0 described by [24]. *In silico* serotyping was performed by  
330 using GeneFinder ([https://github.com/phe-bioinformatics/gene\\_finder](https://github.com/phe-bioinformatics/gene_finder)) which uses Bowtie v2.2.5  
331 (Bowtie , RRID:SCR\_005476)[25] and Samtools v0.1.18 (SAMTOOLS , RRID:SCR\_002105)[26] to align  
332 FASTQ reads to a multifasta containing the target genes (including *wzx*, *wzy* and *fliC*). *Stx* sub-typing  
333 was performed as described in [27]. Illumina FASTQ reads were mapped to the Sakai STEC O157  
334 reference genome (NC\_002695.1) using BWA MEM v0.7.13 (BWA , RRID:SCR\_010910)[28]. Variant  
335 positions identified by GATK v2.6.5 UnifiedGenotyper (GATK , RRID:SCR\_001876)[29] that passed the  
336 following parameters; >90% consensus, minimum read depth of 10, Mapping Quality (MQ) >= 30.  
337 Any variants called at positions that were within the known prophages in Sakai were masked from  
338 further analyses. The remaining variants were imported into SnapperDB v0.2.5 [30].

339

### 340 *DNA extraction, Library preparation and Nanopore Sequencing*

341 To preserve DNA integrity for the nanopore sequencing, genomic DNA was extracted and purified  
342 using the Promega Wizard Genomic DNA Purification Kit (Promega, Madison, USA) with minor  
343 alterations including doubled incubation times, no vigorous mixing steps (performed by inversion)  
344 and elution into 50µl of double processed nuclease free water (Sigma-Aldrich, St. Louis, USA). DNA  
345 was quantified using a Qubit and the HS (High sensitivity) dsDNA Assay Kit (Thermofisher Scientific,  
346 Waltham, USA) to manufacture's instructions. Library preparation was performed using the Rapid  
347 Barcoding Kit - SQK-RBK001 (Oxford Nanopore Technologies, Oxford, UK) with each sample's gDNA  
348 being barcoded by transposase based tagmentation and pooled as per manufacture's instructions.  
349 The prepared library was loaded on a FLO-MIN106 R9.4 flow cell (Oxford Nanopore Technologies,  
350 Oxford, UK) and sequenced using the MinION for 24 hours.

351

#### 352 *Processing and analysis of Nanopore sequence data*

353 Raw FAST5 files were basecalled and de-multiplexed in real-time, as reads were being generated,  
354 using Albacore v2.1 (Oxford Nanopore Technologies) into FASTQ files. Run metrics were generated  
355 using Nanoplot v1.8.1 using default parameters [31]. Reads were processed through Porechop v0.2.1  
356 using default parameters (Wick. Unpublished) [32] to remove any barcodes and adapters used in  
357 SQK-RBK001. For Case A 96,788 reads (10,214,353 bases) were adaptor trimmed and 386 (0.39%)  
358 chimeric reads split. For Case B 430,911 reads (34,888,999 bases) were adaptor trimmed and 513  
359 (0.11%) chimeric reads split. Samples were speciated using Kraken v0.10.4 [33]. A MLST was  
360 assigned using Krocus with the following parameters --kmer 15, --min\_block\_size 300 and --margin  
361 500 [34]. *Stx* sub-typing and serotyping was determined by aligning the basecalled reads using  
362 minimap2 v2.2 [35] and Samtools v1.1 [26] to a multifasta containing the *Stx* and serotype encoding  
363 genes.

364

365 For reference based variant calling FASTQ reads were mapped to the Sakai STEC O157 reference  
366 genome (NC\_002695.1) using minimap2 v2.2 [35]. VCFs were produced using GATK v2.6.5  
367 UnifiedGenotyper [29]. Any variants called at positions that were within the known prophages in  
368 Sakai were masked from further analyses. To determine the optimum consensus cut-off for ONT  
369 variant detection the VCF was filtered with sequentially decreasing ad-ratio values at 0.1 intervals.  
370 Using the Illumina variant calls as the gold standard, F1 scores (the weighted average of precision  
371 and recall) were calculated to determine the optimal ad-ratio for processing ONT data through  
372 GATK.

373

#### 374 *Comparison of Illumina and Nanopore discrepant SNPs*

375 Nanopolish [21] was also used to detect methylation across the ONT data to compare to the  
376 discrepant positions. This was performed using the call-methylation function searching for three  
377 types of methylation including, the DNA adenine methyltransferase (Dam), DNA cytosine methylase  
378 (Dcm) and 5' – cytosine – phosphate – guanine – 3' (CpG) models. The discrepant SNPs between the  
379 Illumina and ONT for both Case A and Case B were manually visualised in Tablet v1.17.08.17 [36] in  
380 order to elucidate the reason for the discrepancy. Discordant SNPs being within a homopolymeric  
381 region were also quantified.

382

### 383 *Generation of phylogenetic trees*

384 Filtered VCF files for each of the Illumina and ONT sequencing data for each sample, were  
385 incorporated, into SnapperDB v0.2.5 [30] containing variant calls from 4471 other STEC CC11  
386 genomes generated through routine surveillance by Public Health England. SnapperDB v0.2.5 [30]  
387 was used to generate a whole genome alignment of the 4475 genomes (including both datasets for  
388 the selected strains for this study). Both methylated positions and prophage positions were masked  
389 from the alignment. The alignment was processed through Gubbins V2.0.0 [37] to account for  
390 recombination events. A maximum likelihood tree was then constructed using RAxML V8.1.17 [38].

391

### 392 *Assembly of ONT data*

393 Trimmed ONT FASTQ files were assembled using Canu v1.6 (Canu, RRID:SCR\_015880)[39]. Polishing  
394 of the assemblies was performed using Nanopolish v0.10.2 [21] using both the trimmed ONT FASTQs  
395 and FAST5s for each respective sample accounting for methylation using the --methylation-aware  
396 option set to dcm. Assemblies were reoriented to start at the *dnaA* gene (NC\_000913) from *E. coli*  
397 K12, using the fixstart parameter in circulator v1.5.5 [40].

398

### 399 *Hybrid assemblies*

400 Trimmed ONT FASTQ files were assembled using Unicycler v0.4.2 [41] with the following parameters  
401 min\_fasta\_length=1000, mode=normal and -1 and -2 for the incorporation of each sample's  
402 equivalent Illumina FASTQ. Pilon v1.23 [42] was used to correct the assembly using the Illumina  
403 reads.

404

### 405 *Assembly of Illumina data*

406 Illumina reads were assembled using SPAdes v3.13.0 (SPAdes , RRID:SCR\_000131)[43] with the  
407 careful parameter activated and with kmer lengths of 21, 33, 55, 65, 77, 83 and 91.

408

409 *Annotation*

410 Prokka v1.13 [44] with the species set to *E. coli* was used to annotate the final assemblies.  
411 Mauve snapshot\_2015-02-25 (1) [45] using the “move contig” function was used to align each  
412 assembly to the ONT reference as they had the least number of contigs.

413

#### 414 **Availability of supporting data**

415 The FASTQ files for the paired read Illumina sequence data can be found on the NCBI (National  
416 Center for Biotechnology Information) Sequence Read Archive (SRA); Case A accession: SRR7184397,  
417 Case B accession - SRR6052929. The ONT FASTQ files, Case A accession – SRR7477814, Case B  
418 accession - SRR7477813. All files can be found under BioProject - PRJNA315192. The assemblies in  
419 the supplementary data were submitted to NCBI GenBank. Illumina assemblies, Case A – X and Case  
420 B – X. ONT assemblies, Case A – X and Case B. All supplementary files can be found under BioProject  
421 - PRJNA315192, and additional supporting data is in the *GigaScience* GigaDB repository [46].

422

#### 423 **Abbreviations**

424 AUC: Area under curve; BWA: Burrows-Wheeler aligner; CC: Clonal complex; Dam: DNA adenine  
425 methyltransferase; Dcm: DNA cytosine methylase; GATK: Genome analysis toolkit; HUS: Haemolytic  
426 Uremic Syndrome; MLST: Multi-locus sequence type; NCBI: National Center for Biotechnology  
427 Information; ONT: Oxford Nanopore Technologies; PHE: Public Health England; SNP: Single  
428 nucleotide polymorphism; SRA: Sequence read archive; STEC: Shiga toxin-producing *Escherichia coli*;  
429 VCF: Variant call format; WGS: Whole genome sequencing.

430

#### 431 **Author contributions**

432 CJ and TJD conceptualised the project. CJ and DRG performed DNA extractions. DRG performed  
433 library preparation and Nanopore sequencing. TJD and DRG processed Illumina sequence data. DRG  
434 processed all ONT data. TJD performed ONT optimisation. DRG performed methylation analysis. TJD  
435 and DRG performed Illumina and ONT data comparison. CJ wrote the original draft. DRG, CJ, SG and  
436 TJD performed manuscript editing.

437

#### 438 **Competing interests**

439 This project was part funded by Oxford Nanopore Technologies.

440

#### 441 **Acknowledgements**



442 We would like to thank Oxford Nanopore Technologies for supplying the Rapid Barcoding Kit - SQK-  
443 RBK001 and FLO-MIN106 R9.4 flow cell used in this research. In particular we would like to thank  
444 Leila Luheshi and Divya Mirrington for their support and scientific assistance.

445 We would also like to thank the frontline NHS Laboratories for submitting the samples used in this  
446 study to the Gastrointestinal Bacteria Reference Unit at Public Health England.

447 We would like to acknowledge Dr Andrew Page of the Quadram Institute for critically reviewing the  
448 manuscript.

449

## 450 **References**

- 451 1. Croxen MA, Law RJ, Scholz R, Keeney KM, Wlodarska M, Finlay BB. Recent advances in  
452 understanding enteric pathogenic *Escherichia coli*. Clin Microbiol Rev. 2013. 26(4):822-80.  
453 doi: 10.1128/CMR.00022-13.
- 454 2. Byrne L, Jenkins C, Launders N, Elson R, Adak GK. The epidemiology, microbiology and  
455 clinical impact of Shiga toxin-producing *Escherichia coli* in England, 2009-2012. Epidemiol  
456 Infect. 2015. 143(16):3475-87. doi: 10.1017/S0950268815000746.
- 457 3. Launders N, Byrne L, Jenkins C, Harker K, Charlett A, Adak GK. Disease severity of Shiga toxin-  
458 producing *E. coli* O157 and factors influencing the development of typical haemolytic  
459 uraemic syndrome: a retrospective cohort study, 2009-2012. BMJ Open. 2016. 6(1):e009933.  
460 doi: 10.1136/bmjopen-2015-009933.
- 461 4. Heiman KE, Mody RK, Johnson SD, Griffin PM, Gould LH. *Escherichia coli* O157 Outbreaks in  
462 the United States, 2003-2012. Emerg Infect Dis. 2015. 21(8):1293-1301. doi:  
463 10.3201/eid2108.141364.
- 464 5. Dallman TJ, Ashton PM, Byrne L, Perry NT, Petrovska L, Ellis R, Allison L, Hanson M, Holmes  
465 A, Gunn GJ, Chase-Topping ME, Woolhouse ME, Grant KA, Gally DL, Wain J, Jenkins C.  
466 Applying phylogenomics to understand the emergence of Shiga-toxin-producing *Escherichia*  
467 *coli* O157:H7 strains causing severe human disease in the UK. Microb Genom. 2015.  
468 1(3):e000029. doi: 10.1099/mgen.0.000029.
- 469 6. Dallman TJ, Byrne L, Ashton PM, Cowley LA, Perry NT, Adak G, Petrovska L, Ellis RJ, Elson R,  
470 Underwood A, Green J, Hanage WP, Jenkins C, Grant K, Wain J. Whole-genome sequencing  
471 for national surveillance of Shiga toxin-producing *Escherichia coli* O157. Clin Infect Dis. 2015.  
472 61(3):305-12. doi: 10.1093/cid/civ318.

- 473 7. Olson ND, Lund SP, Colman RE, Foster JT, Sahl JW, Schupp JM, Keim P, Morrow JB, Salit ML,  
474 Zook JM. Best practices for evaluating single nucleotide variant calling methods for microbial  
475 genomics. *Front Genet.* 2015. 6(235): doi: 10.3389/fgene.2015.00235.
- 476 8. Ruffalo M, Koytürk M, Ray S, LaFramboise T. Accurate estimation of short read mapping  
477 quality for next-generation genome sequencing. *Bioinformatics.* 2012. 28(18):i349-i355. doi:  
478 10.1093/bioinformatics/bts408.
- 479 9. Timme RE, Rand H, Sanchez Leon M, Hoffmann M, Strain E, Allard M, Roberson D, Baugher  
480 JD. GenomeTrakr proficiency testing for foodborne pathogen surveillance: an exercise from  
481 2015. *Microb Genom.* 2018. 4(7). doi: 10.1099/mgen.0.000185.
- 482 10. Quick J, Loman NJ, Duraffour S, Simpson JT, Severi E, Cowley L, Bore JA, Koundouno R, Dudas  
483 G, Mikhail A, Ouédraogo N, Afrough B, Bah A, Baum JH, Becker-Ziaja B, Boettcher JP, Cabeza-  
484 Cabrerizo M, Camino-Sanchez A, Carter LL, Doerrbecker J, Enkirch T, Dorival IGG, Hetzelt N,  
485 Hinzmann J, Holm T, Kafetzopoulou LE, Koropogui M, Kosgey A, Kuisma E, Logue CH,  
486 Mazzarelli A, Meisel S, Mertens M, Michel J, Ngabo D, Nitzsche K, Pallash E, Patrono LV,  
487 Portmann J, Repits JG, Rickett NY, Sachse A, Singethan K, Vitoriano I, Yemanaberhan RL,  
488 Zekeng EG, Trina R, Bello A, Sall AA, Faye O, Faye O, Magassouba N, Williams CV, Amburgey  
489 V, Winona L, Davis E, Gerlach J, Washington F, Monteil V, Jourdain M, Bererd M, Camara A,  
490 Somlare H, Camara A, Gerard M, Bado G, Baillet B, Delaune D, Nebie KY, Diarra A, Savane Y,  
491 Pallawo RB, Gutierrez GJ, Milhano N, Roger I, Williams CJ, Yattara F, Lewandowski K, Taylor J,  
492 Rachwal P, Turner D, Pollakis G, Hiscox JA, Matthews DA, O'Shea MK, Johnston AM, Wilson  
493 D, Hutley E, Smit E, Di Caro A, Woelfel R, Stoecker K, Fleischmann E, Gabriel M, Weller SA,  
494 Koivogui L, Diallo B, Keita S, Rambaut A, Formenty P, Gunther S, Carroll MW. Real-time  
495 portable genome sequencing for Ebola surveillance. *Nature.* 2016. 530(7589):228-32 doi:  
496 10.1038/nature16996.
- 497 11. Gomez-Eichelmann MC, Levy-Mustri A, Ramirez-Santos J. Presence of 5-methylcytosine in  
498 CC(A/T)GG sequences (Dcm methylation) in DNAs from different bacteria. *J Bacteriol.* 1991.  
499 173(23):7692-4.
- 500 12. Mikheyev AS, Tin MM. A first look at the Oxford Nanopore MinION sequencer. *Mol Ecol*  
501 *Resour.* 2014. 14(6):1097-102. doi: 10.1111/1755-0998.12324.
- 502 13. Laver T, Harrison J, O'Neill PA, Moore K, Farbos A, Paszkiewicz K, Studholme DJ. Assessing  
503 the performance of the Oxford Nanopore Technologies MinION. *Biomol Detect Quantif.*  
504 2015. 1-8.

- 505 14. Magi A, Semeraro R, Mingrino A, Giusti B, D'Aurizio R. Nanopore sequencing data analysis:  
506 state of the art, applications and challenges. *Brief Bioinform.* 2017. doi: 10.1093/bib/bbx062.
- 507 15. Rang FJ, Kloosterman WP, de Ridder J. From squiggle to basepair: computational approaches  
508 for improving nanopore sequencing read accuracy. *Genome Biol.* 2018. 19(1):90. doi:  
509 10.1186/s13059-018-1462-9.
- 510 16. Senol Cali D, Kim JS, Ghose S, Alkan C, Mutlu O. Nanopore sequencing technology and tools  
511 for genome assembly: computational analysis of the current state, bottlenecks and future  
512 directions. *Brief Bioinform.* 2018. doi: 10.1093/bib/bby017.
- 513 17. Marinus MG. DNA methylation in *Escherichia coli*. *Annu Rev Genet.* 1987. 21:113-31.
- 514 18. Jain M, Koren S, Miga KH, Quick J, Rand AC, Sasani TA, Tyson JR, Beggs AD, Dilthey AT, Fiddes  
515 IT, Malla S, Marriott H, Nieto T, O'Grady J, Olsen HE, Pedersen BS, Rhie A, Richardson  
516 H, Quinlan AR, Snutch TP, Tee L, Paten B, Phillippy AM, Simpson JT, Loman NJ, Loose M.  
517 Nanopore sequencing and assembly of a human genome with ultra-long reads. *Nat*  
518 *Biotechnol.* 2018. 36(4):338-345. doi: 10.1038/nbt.4060.
- 519 19. Ebler J, Haukness M, Pesout T, Marschall T, Paten B. Haplotype-aware genotyping from noisy  
520 long reads. *Genome Biol.* 2019 Jun 3;20(1):116. doi: 10.1186/s13059-019-1709-0.
- 521 20. Sarkozy P, Jobbágy Á, Antal P. Calling homopolymer stretches from raw Nanopore reads by  
522 analyzing k-mer dwell times. In: Eskola H., Väisänen O., Viik J., Hyttinen J. (eds) *EMBECC &*  
523 *NBC 2017. EMBEC 2017, NBC 2017. IFMBE Proceedings, 2018. vol 65. Springer, Singapore.*
- 524 21. Loman NJ, Quick J, Simpson JT. A complete bacterial genome assembled de novo using only  
525 nanopore sequencing data. *Nat Methods.* 2015. 12(8):733–5. doi: 10.1038/nmeth.3444.
- 526 22. Wick RR, Judd LM, Gorrie CL, Holt KE. Completing bacterial genome assemblies with  
527 multiplex MinION sequencing. *Microb Genom.* 2017. 3(10):e000132. doi:  
528 10.1099/mgen.0.000132.
- 529 23. Bolger AM, Lohse M, Usadel B. Trimmomatic: A flexible trimmer for Illumina Sequence  
530 Data. *Bioinformatics.* 2014. 30(15):2114-20. doi: 10.1093/bioinformatics/btu170.
- 531 24. Tewolde R, Dallman T, Schaefer U, Sheppard CL, Ashton P, Pichon B, Ellington M, Swift C,  
532 Green J, Underwood A. MOST: a modified MLST typing tool based on short read sequencing.  
533 *PeerJ.* 2016. 4:e2308. doi: 10.7717/peerj.2308.
- 534 25. Langmead B, Salzberg SL. Fast gapped-read alignment with Bowtie 2. *Nat Methods.* 2012.  
535 9(4):357-9. doi: 10.1038/nmeth.1923.

- 536 26. Li H, Handsaker B, Wysoker A, Fennell T, Ruan J, Homer N, Marth G, Abecasis G, Durbin R,  
537 1000 Genome Project Data Processing Subgroup. The Sequence alignment/map (SAM)  
538 format and SAMtools. *Bioinformatics*. 2009. 25(16):2078-9. doi:  
539 10.1093/bioinformatics/btp352.
- 540 27. Ashton PM, Perry N, Ellis R, Petrovska L, Wain J, Grant KA, Jenkins C, Dallman TJ. Insight into  
541 Shiga toxin gene encoded by *Escherichia coli* O157 from whole genome sequencing. *PeerJ*.  
542 2015. 17. doi: 10.7717/peerj.739.
- 543 28. Li H, Durbin R. Fast and accurate short read alignment with Burrows-Wheeler Transform.  
544 *Bioinformatics*. 2009. 25(14):1754-60. doi: 10.1093/bioinformatics/btp324.
- 545 29. McKenna A, Hanna M, Banks E, Sivachenko A, Cibulskis K, Kernytsky A, Garimella K, Altshuler  
546 D, Gabriel S, Daly M, DePristo MA. The Genome Analysis Toolkit: a MapReduce frame- work  
547 for analyzing next-generation DNA sequencing data. *Genome Res*. 2010. 20(9):1297-303.  
548 doi: 10.1101/gr.107524.110.
- 549 30. Dallman T Ashton P, Schafer U, Jironkin A, Painset A, Shaaban S, Hartman H, Myers R,  
550 Underwood A, Jenkins C, Grant K. SnapperDB: A database solution for routine sequencing  
551 analysis of bacterial isolates. *Bioinformatics*. 2018. doi: 10.1093/bioinformatics/bty212.
- 552 31. De Coster W, D’Hert S, Schultz DT, Cruts M, Van Broeckhoven C. NanoPack: visualizing and  
553 processing long-read sequencing data. *Bioinformatics*. 2018. 34(15):2666-9. doi:  
554 10.1093/bioinformatics/bty149.
- 555 32. Wick R. Porechop GitHub page. <https://github.com/rrwick/Porechop>.
- 556 33. Wood DE, Salzberg SL. Kraken: ultrafast metagenomic sequence classification using exact  
557 alignments. *Genome Biol*. 2014. 15(3):R46. doi: 10.1186/gb-2014-15-3-r46.
- 558 34. Page A, Keane J. Rapid multi-locus sequence typing direct from uncorrected long reads using  
559 *Krocus*. *PeerJ*. 2018. 6:e5233 doi: 10.7717/peerj.5233.
- 560 35. Li H. Minimap2: fast pairwise alignment for long nucleotide sequences. *Bioinformatics*. 2018.  
561 doi: 10.1093/bioinformatics/bty191.
- 562 36. Milne I Stephen G, Bayer M, Cock PJ, Pritchard L, Cardle L, Shaw PD, Marshall D. Using Tablet  
563 for visual exploration of second-generation sequencing data. *Briefings in Bioinformatics*.  
564 2013. 14(2):193-202. doi: 10.1093/bib/bbs012.

- 565 37. Croucher NJ, Page AJ, Connor TR, Delaney AJ, Keane JA, Bentley SD, Parkhill J, Harris SR.  
566 Rapid phylogenetic analysis of large samples of recombinant bacterial whole genome  
567 sequences using Gubbins. *Nucleic Acids Res.* 2014. 43(3):e15. doi: 10.1093/nar/gku1196.
- 568 38. Stamatakis A. 2014. RAxML Version 8: A tool for Phylogenetic Analysis and Post-Analysis of  
569 Large Phylogenies. *Bioinformatics.* 2014. 30(9):1312-13. doi:  
570 10.1093/bioinformatics/btu033.
- 571 39. Koren S, Walenz BP, Berlin K, Miller JR, Phillippy AM. 2017. Canu: scalable and accurate long-  
572 read assembly via adaptive k-mer weighting and repeat separation. *Genome Res.* 27(5):722-  
573 36. doi: 10.1101/gr.215087.116.
- 574 40. Hunt M, Silva ND, Otto TD, Parkhill J, Keane JA, Harris SR. 2015. Circlator: automated  
575 circularization of genome assemblies using long sequencing reads. *Genome Biol.* 16(294):1-  
576 10. doi: 10.1186/s13059-015-0849-0.
- 577 41. Wick RR, Judd LM, Gorrie CL, Holt KE. 2017. Unicycler: Resolving bacterial genome  
578 assemblies from short and long sequencing reads. *PLoS Comput Biol.* 13(6):e1005595. doi:  
579 10.1371/journal.pcbi.1005595.
- 580 42. Walker BJ, Abeel T, Shea T, Priest M, Abouelliel A, Sakthikumar S, Cuomo CA, Zeng Q,  
581 Wortman J, Young SK, Earl AM. 2014. Pilon: an integrated tool for comprehensive microbial  
582 variant detection and genome assembly improvement. *PLOS One.* 9(11):e112963. doi:  
583 10.1371/journal.pone.0112963.
- 584 43. Bankevich A, Nurk S, Antipov D, Gurevich AA, Dvorkin M, Kulikov AS, Lesin VM, Nikolenko SI,  
585 Pham S, Prjibelski AD, Pyshkin AV, Sirotkin AV, Vyahhi N, Tesler G, Alekseyev MA, Pevzner  
586 PA. 2012. SPAdes: A new genome assembly algorithm and its applications to single cell  
587 sequencing. *J Comput Biol.* 19(5):455-77. doi: 10.1089/cmb.2012.0021.
- 588 44. Seemann T. 2014. Prokka: rapid prokaryotic genome annotation. *Bioinformatics.*  
589 30(14):2068-9. doi: 10.1093/bioinformatics/btu153.
- 590 45. Darling ACE, Mau B, Blattner FR, Perna NT. 2004. Mauve: Multiple alignment of conserved  
591 genomic sequence with rearrangements. *Genome Res.* 14(7):1394-403. doi:  
592 10.1101/gr.2289704.
- 593 46. Greig DR; Jenkins C; Gharbia S; Dallman TJ (2019): Supporting data for "Comparison of single  
594 nucleotide variants identified by Illumina and Oxford Nanopore technologies in the context  
595 of a potential outbreak of Shiga Toxin Producing *Escherichia coli*" GigaScience Database.  
596 <http://dx.doi.org/10.5524/100623>

597

598

599

600

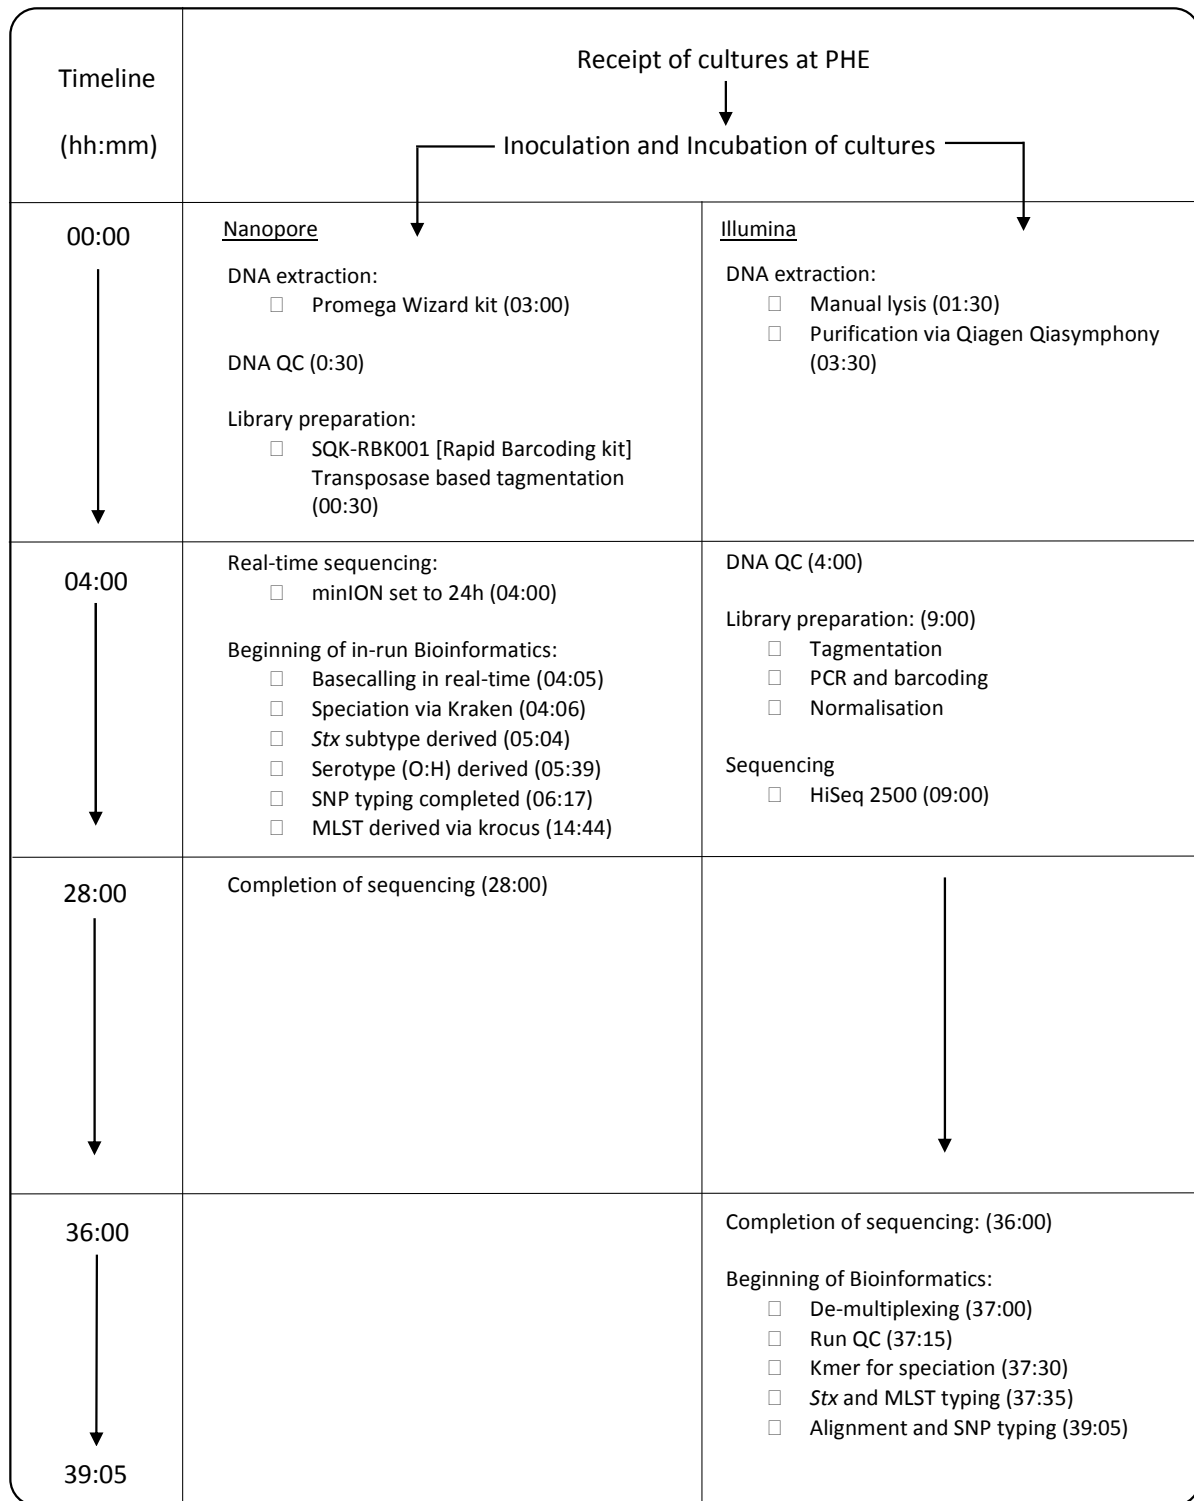

**Figure 1** – Figure showing comparative timeline from beginning DNA extraction to results generation for Oxford Nanopore and Illumina technologies. Times shown the completion of the labelled event relative to the start of the assay (hh:mm).



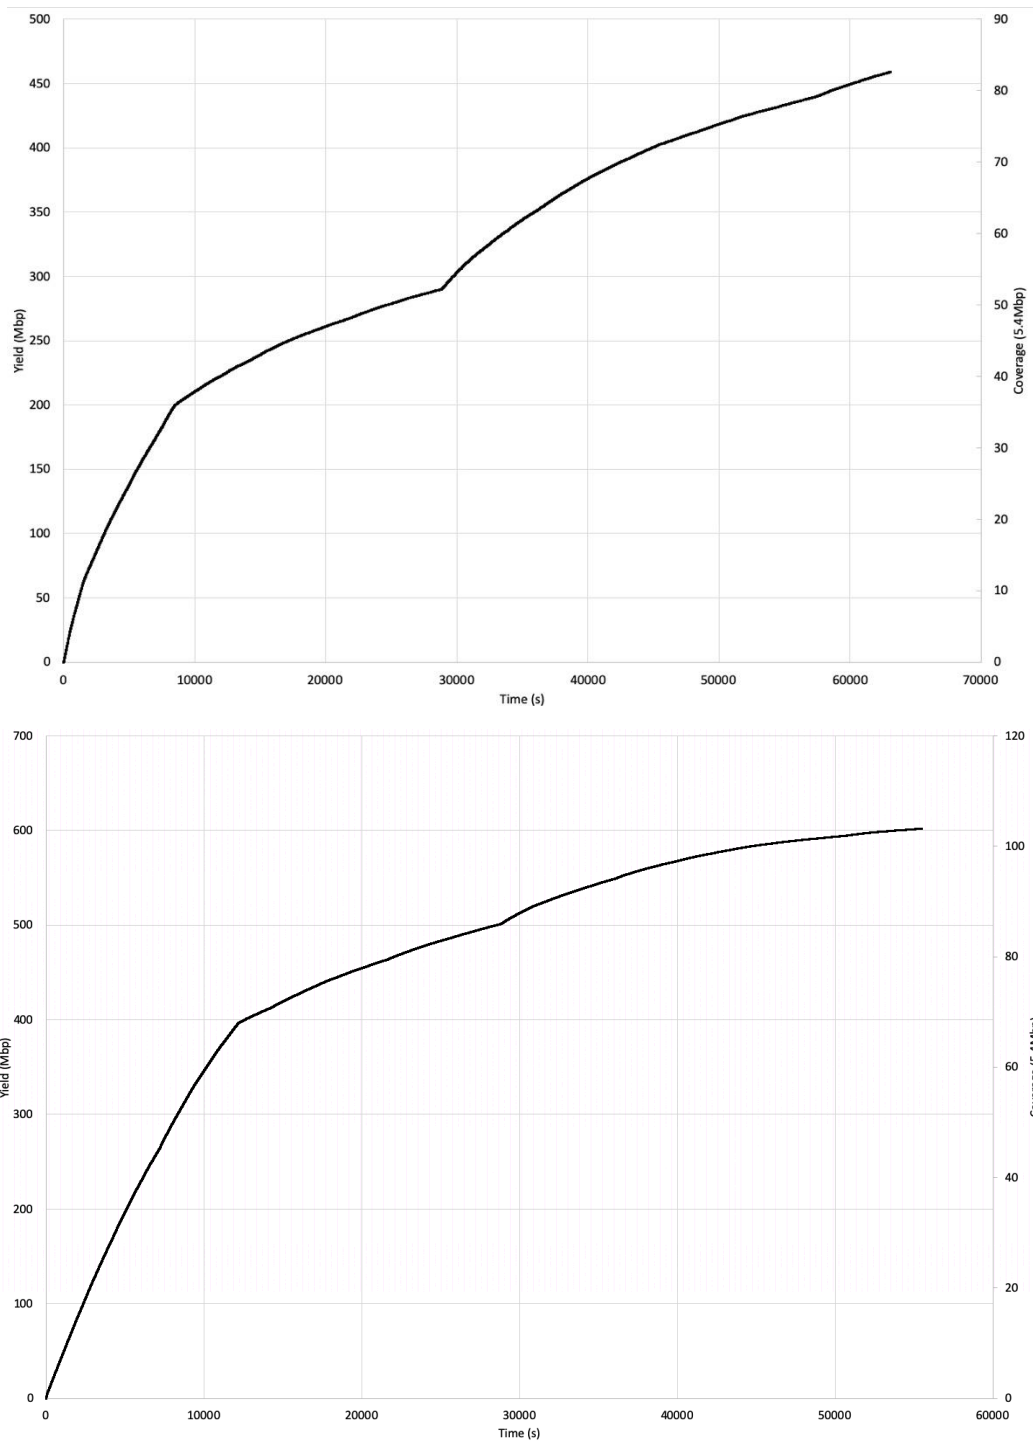

**Figure 2** – Two time/yield/coverage graphs showing production of reads in real-time and the associated cumulative mapping coverage. Case A is the graph on the left and Case B is on the right.

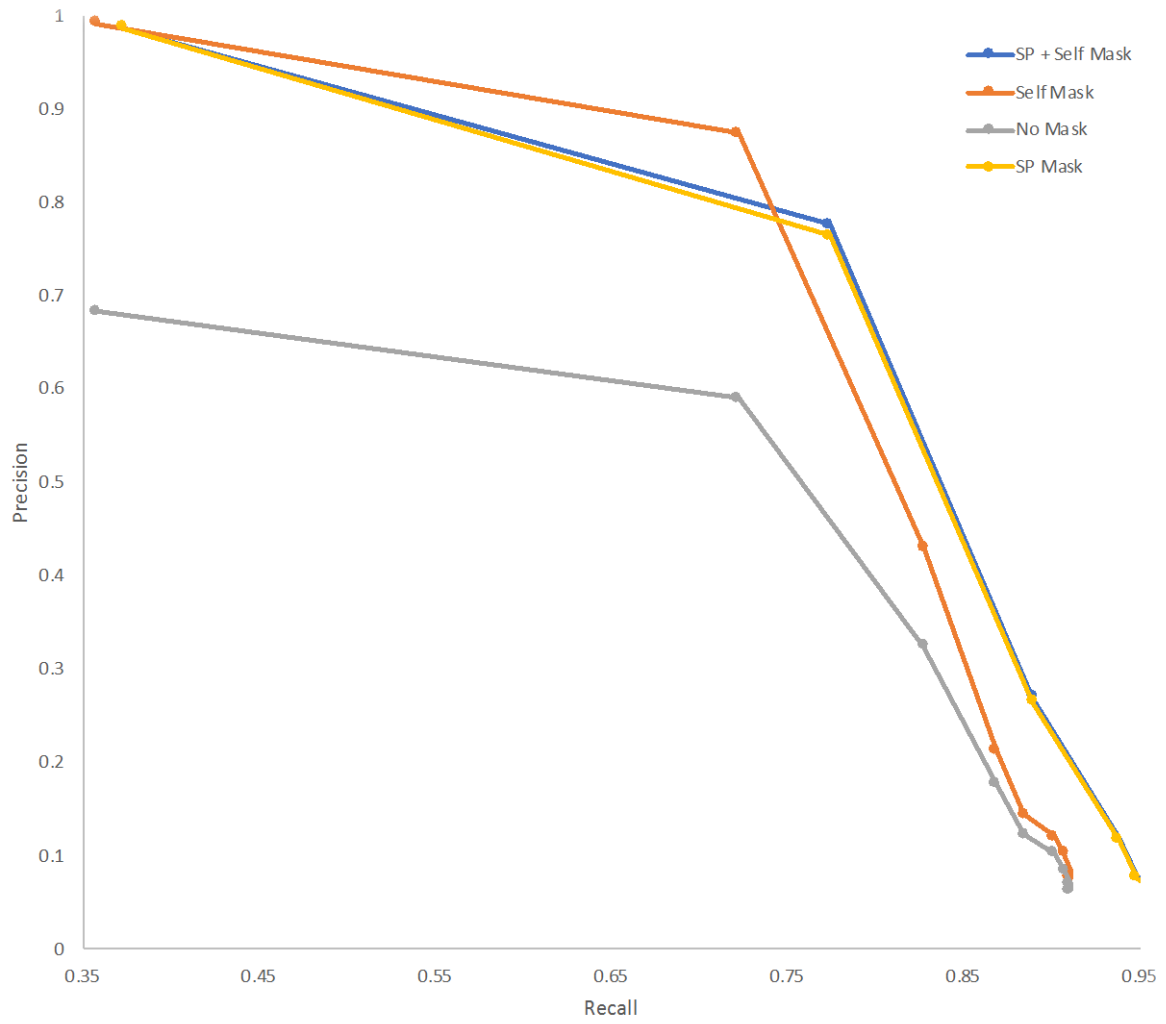

**Figure 3** – Precision Vs Recall of variant calling for an array of consensus ratio cut-offs and pre-masking strategies including masking positions annotated as ‘Sakai phage’ (‘SP’) and positions that are ambiguously self-mapped (‘Self’) with simulated Illumina FASTQs from the reference genome. Performed on case B.

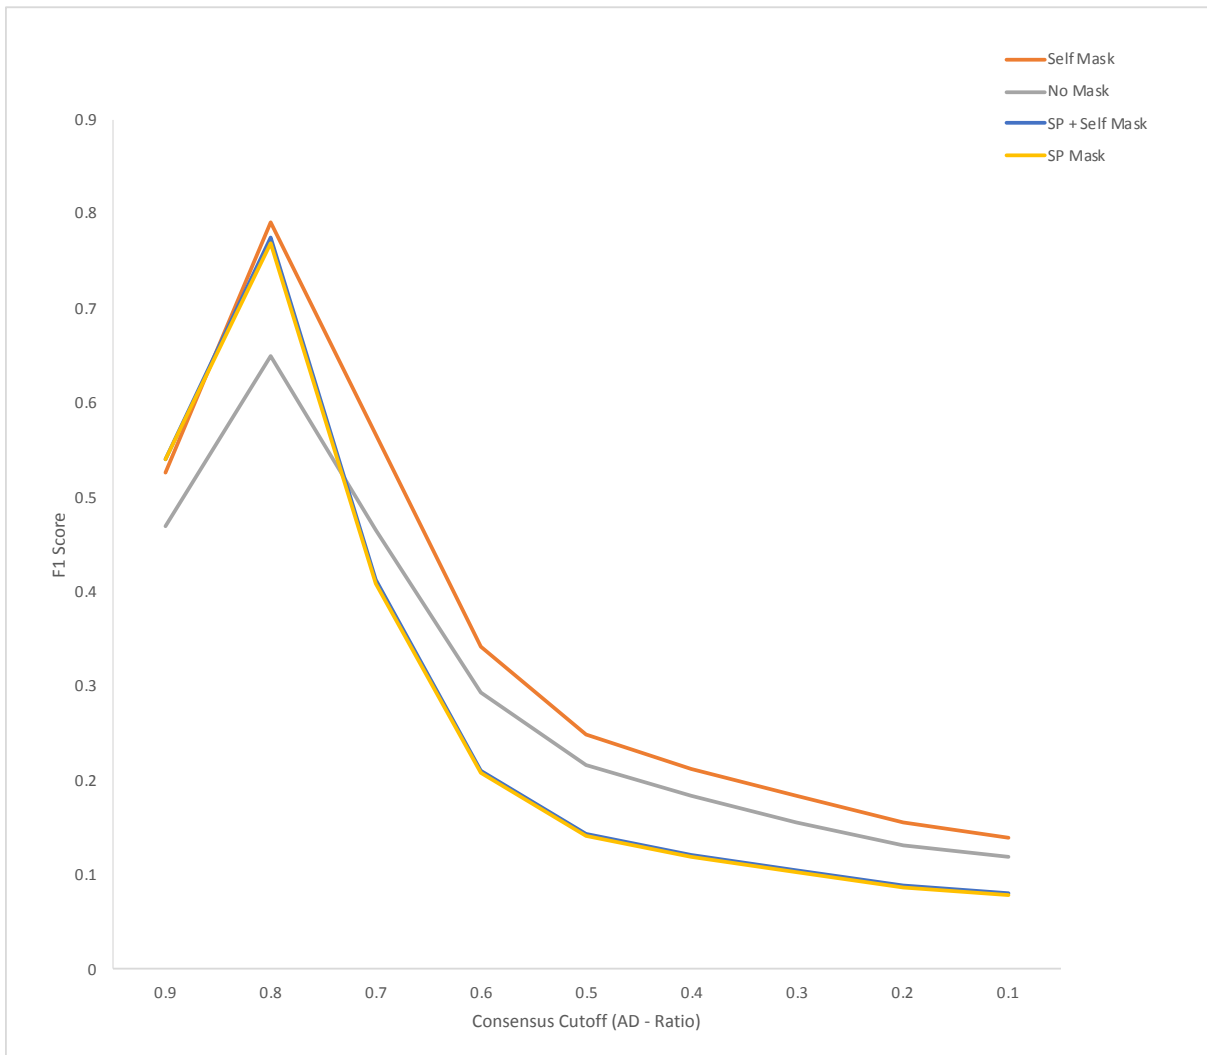

**Figure 4** – F1 Score for an array of consensus ratio cut-offs and pre-masking strategies including masking positions annotated as ‘Sakai phage’ (‘SP’) and positions that are ambiguously self-mapped (‘Self’) with simulated Illumina FASTQs from the reference genome.

|           | Position |    |         |    |    | Case                |                   |                  |
|-----------|----------|----|---------|----|----|---------------------|-------------------|------------------|
|           | -2       | -1 | Variant | +1 | +2 | A                   | B                 |                  |
| Reference | C        | C  | A       | G  | G  | A > G<br>Transition | 69.62%<br>(n=181) | 77.66%<br>(n=73) |
| Alignment | C        | C  | G       | =  | G  |                     |                   |                  |
| Reference | C        | C  | T       | G  | G  | T > C<br>Transition | 30.38%<br>(n=79)  | 22.34%<br>(n=21) |
| Alignment | C        | C  | C       | G  | G  |                     |                   |                  |
| Total     |          |    |         |    |    | 100%<br>(n=260)     | 100%<br>(n=94)    |                  |

**Figure 5** – Figure showing the two most common discrepancies in the ONT optimised GATK VCFs and a breakdown of the relative proportions of these transitions compared to the total number of discrepant SNPs for both cases.

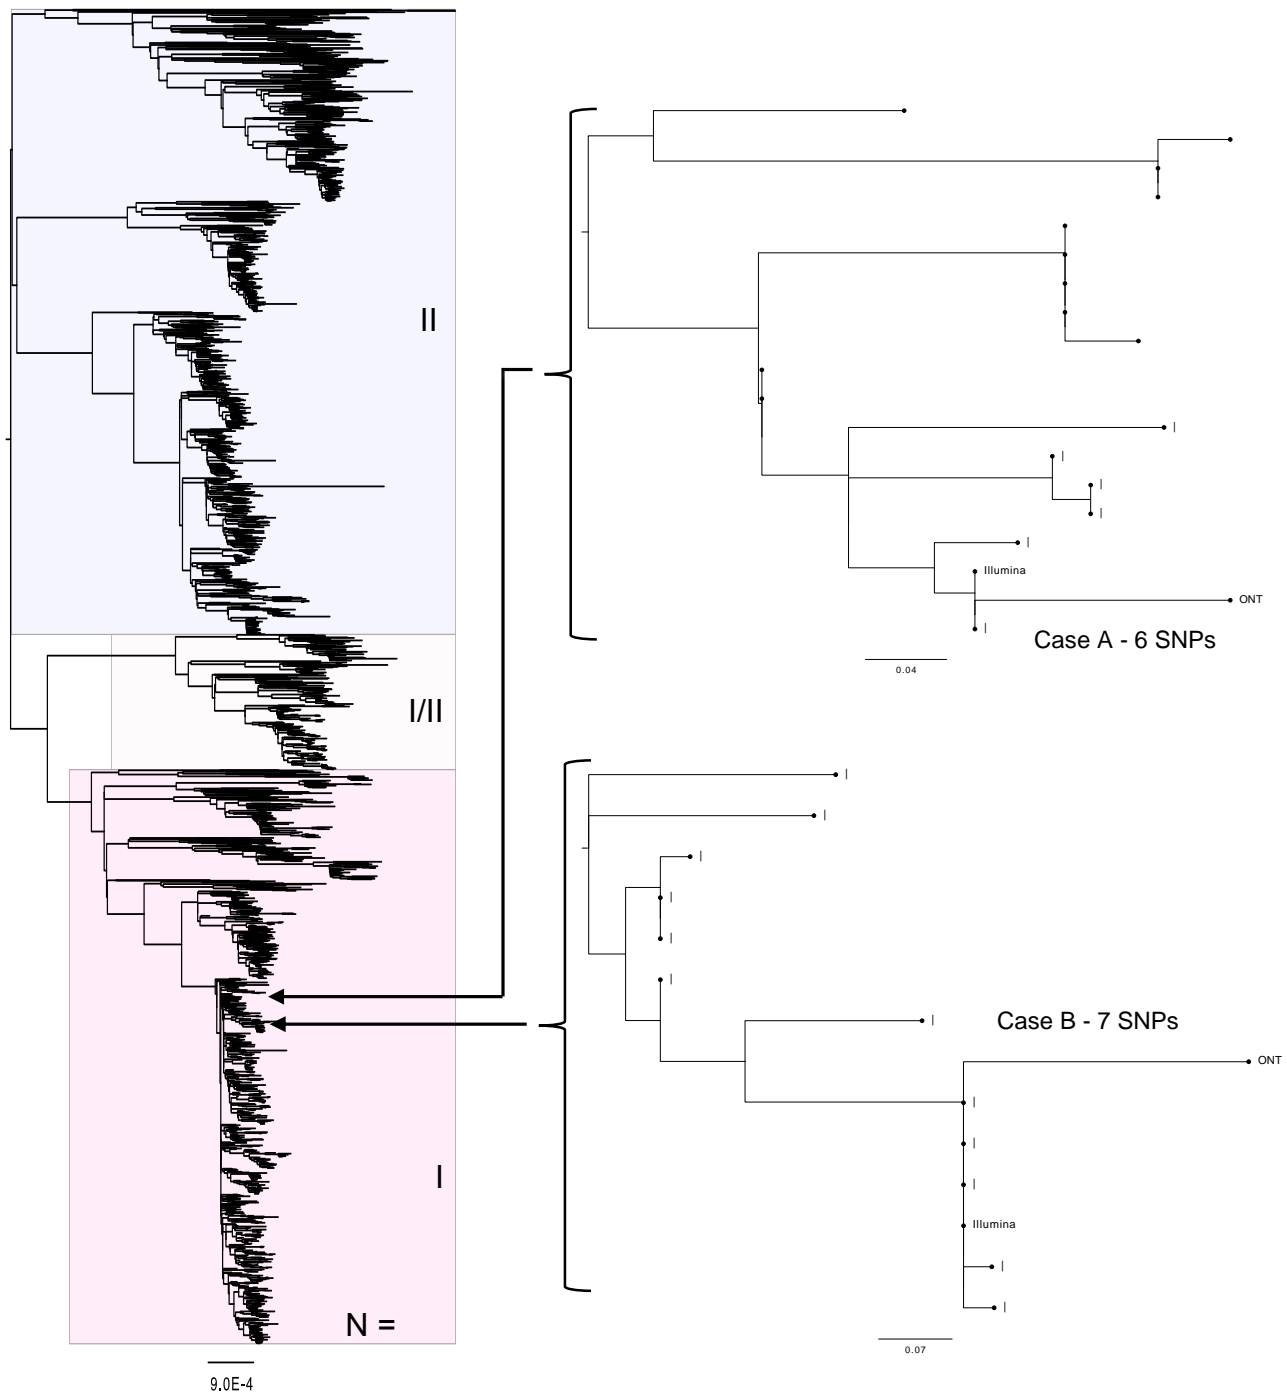

**Figure 6** – Maximum likelihood tree, of a “soft core” alignment of 4475 genomes showing the tree lineages (I, I/II and II) of STEC (Clonal Complex 11). Also showing where Oxford Nanopore and Illumina sequencing data is placed within the tree for each of the two cases. All methylated positions and prophage regions have been masked. Values represent the SNP differences between the Illumina and ONT data for both cases.

## Supplementary Tables

| Case | # of contigs in ONT-only assembly (size bp) | # of contigs in hybrid assembly (size bp) | # of contigs in Illumina-only assembly (size bp) |
|------|---------------------------------------------|-------------------------------------------|--------------------------------------------------|
| A    | 5 (5,725,666 bp)                            | 25 (5,506,670 bp)                         | 668 (5,449,735 bp)                               |
| B    | 4 (5,620,611 bp)                            | 34 (5,491,608 bp)                         | 575 (5,424,436 bp)                               |

**Table 1** – Table showing the number of contigs generated and size of assembly for each assembly method for both cases.

## Supplementary Figures

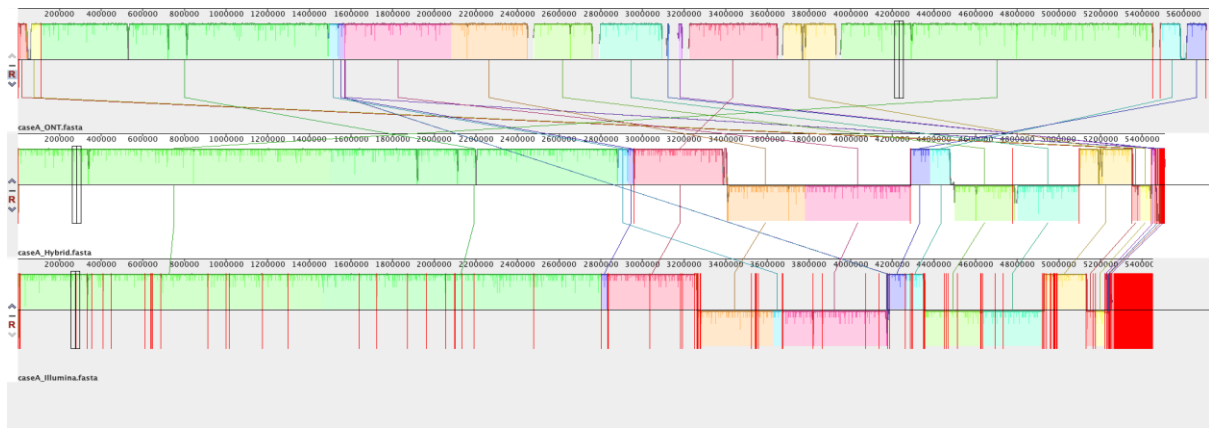

**Supplementary figure 1** – Mauve alignment showing regions of similarity between the ONT-only, hybrid and Illumina-only assemblies (order descending) for Case A. Also showing the chromosomal regions in the ONT-only assembly that did not match the other assemblies (red arrows).



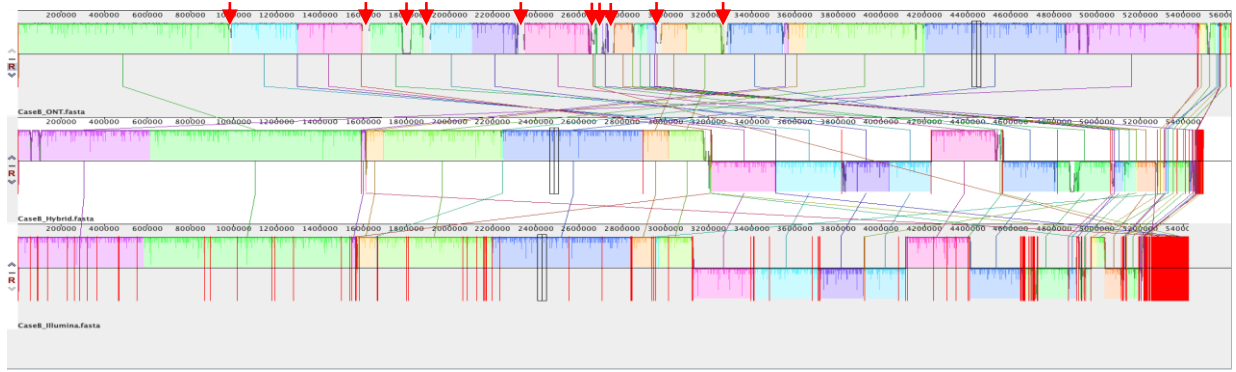

**Supplementary figure 2** – Mauve alignment showing regions of similarity between the ONT-only, hybrid and Illumina-only assemblies (order descending) for Case B. Also showing the chromosomal regions in the ONT-only assembly that did not match the other assemblies (red arrows).

## Reviewer reports:

**Reviewer #1:** This manuscript describes a comparative analysis of Illumina and Nanopore sequencing, evaluating their usefulness for phylogenetic analysis, and for identifying genetic variants in outbreak situations.

The outcome of the research is somewhat surprising, given the expectation that Illumina sequencing represents the current gold-standard in sequencing accuracy. When eliminating systematic variation in base sequences caused by methylation, Nanopore sequencing appears to have similar accuracy to Illumina sequencing for the purpose of variant categorisation. When methylation is considered as an important feature, Nanopore sequencing demonstrates both a greater detection ability, and a faster turnaround time compared to Illumina sequencing. I am pleased to note that the supporting data was available at the time I carried out my review, and also pleased to be given the opportunity to approve this manuscript for publication.

I was specifically asked by the editors to state whether this represents "the state-of-the-art in terms of what this platform can do." It would be underselling the impact of these results to say no, that the current basecalling technology is better than what is presented in this paper. Due to the rapid advancement of nanopore sequencing technology in hardware, software, and chemistry, the yield and quality of results obtained from nanopore sequencing will be better than what is in \*any\* publication, even at the time when a manuscript is submitted for review.

I recall seeing (and commenting) on David, Claire, Kathie, and Timothy's poster presented in April 2018, which seems to have been a similar (if not the same) study [<https://twitter.com/gingerdavid92/status/987947325086666753>]. This was the first study I'd seen that explicitly compared Illumina and Nanopore sequencing for phylogenetics [I accept there may be others that I haven't seen], and I'm pleased to see that they have incorporated an explicit analysis of methylation signals since then.

People have previously looked at phylogenetic trees for outbreak tracking with Nanopore sequencing (e.g. <https://doi.org/10.2807/2F1560-7917.ES.2018.23.12.17-00140> [essentially cited in ref#10]), at accuracy estimates for Nanopore basecalling (e.g. <https://doi.org/10.1101/543439>), at hybrid isolate assembly from barcoded Nanopore and Illumina reads (e.g. <https://doi.org/10.1099/2Fmgen.0.000132> [cited]), and at comparing clinical turnaround time for Nanopore vs Illumina (e.g. <https://doi.org/10.1128/JCM.02483-16>), but this paper puts it all together into something that is still of substantial interest to the research community, as demonstrated by the social media impact of their preprint (<https://doi.org/10.1101/570192>).

In short, this manuscript is an excellent demonstration of what nanopore sequencing is capable of, represents the state-of-the-art (as I understand it) for public health investigations as presented in published papers, and I look forward to seeing more studies like this in the future.

## Additional comments / questions:

1. Results, Tables 1/2 line 194-200 - Could you please either add in the legend that these SNPs were homoplasmic (very unlikely for ONT, somewhat possible for Illumina), or add the depth of the reference SNP bases to the table?

We have added the depth of sequencing for the final discrepant SNPs in to Table 2.

We have identified what SNPs in the were homoplasmic (5/7 Illumina variants) and a line in the text.

2. Methods, line 348 - These were barcoded reads that were processed through Porechop, which I understand can identify and filter out chimeric reads. Do you know how many reads were chimeric (we've typically observed <0.5% chimeric reads from rapid adapter preps, about 4% from ligation preps)?

We have added a line in the methods with these figures.

3. Discussion, line 239 - It is interesting to see from Figure 1 that all the nanopore data analysis was completed before the sequencing run had ended. Maybe this could be emphasised here: "within 377 minutes (i.e. over 20 hours \*before\* the sequencing run was scheduled to finish)."

We have added a short statement emphasising the difference between technologies.

4. Discussion, lines 250-259 - The final sentence doesn't seem to match the general idea of this paragraph. The paragraph is about single-base accuracy for single molecules (note: Illumina never sequences a single molecule to generate a base call), whereas the last sentence is about phylogenetics. I'd be happier if this paragraph were deleted entirely, as phylogenetics and error are also discussed in the next paragraph.

We have removed the last sentence from this paragraph. We think it is important to keep the current limitations to show what was state of the art at the time of this publication

5. Discussion, line 283 - "long reads... workflow is" -> "longreads... workflow are"

This has now been corrected.

6. Discussion, line 303 - "up-dates" -> "updates"

This has now been corrected.

7. Figure 1 - Why were different methods used for DNA extraction (i.e. Promega Wizard vs Manual lysis / Qiagen Qiasymphony)?

The Qiasymphony utilises a magnetic beads in beating protocol that causes DNA fragmentation leading to a decrease in high molecular weight DNA molecules and thereby sub-optimal for long read sequencing. Therefore, a commercial gDNA extraction kit with modifications to attempt to keep the DNA integrity as high as possible and thus generate longer reads. We have added a sentence in the text to reflect the motivation of DNA extraction method.

8. Figure 2 - The numbers are difficult to read. Could the axis text be made larger?

We have enlarged the text for the axis for both graphs in Figure 2.

9. Figure 4 - This should be a line graph (similar to figure 3). The points represent sampling of potential cutoff scores along a continuous distribution, and the score represents a single value rather than count data.

We have modified the figure accordingly

10. Figure 5 - Table 1 (Line 165-166) mentions that the total number of discrepant variants for case A and B is 266 and 101 respectively. This doesn't match the percentages and totals represented in Figure 5. I would expect that the Total line for A/B in Figure 5 should be 97.7% and 93% respectively, indicating that transitions comprised that proportion of the total variants. It would be useful to refer back to Tables 1 & 2 in the text for the other discrepant variants.

We have clarified this in the legend in figure 5. In table 1 we are showing the total number of discrepant positions within both Illumina and ONT vcfs, however in figure 5 we are discussing only the variant positions in the ONT data alone that were determined to be methylated. Figure 5 should equate to the row titled '# of discrepant variants with methylated positions masked' in Table 1.

11. Figure 6 - What do the numbers represent? It is not clear from the figure legend. These are presumably not bootstrap values, as they have a consistent ordering from top to bottom.

These values represent each respective case's SNP differences between the Illumina and ONT as demonstrated on the tree. We have updated the figure (6) legend to now include this clarification.

General questions:

Given that the Nanopore technology has improved in a number of different areas since this investigation was carried out (e.g. 9.4.1 Series D Flow cells, Field sequencing kit and/or RBK004, flip-flop basecaller), what (if anything) would be done differently if you had the opportunity to do this again?

Of your suggestions, the only one likely to make a significant difference would be re-basecalling with the most up to date flip-flop basecaller, we would hypothesise that this would reduce the number of SNP differences if it accounts for methylation better than previous basecalling algorithms. Another advancement is the new R10 pores which aims to improve the consensus accuracy is about 99.999% which again would reduce the number of total SNP differences but will most likely not account for methylation (unless a trained basecaller is also developed with these pores to account for methylation).

Are the assemblies available? I can't see anything about the assemblies in the "Availability" section.

We have now uploaded our assemblies to NCBI and have added a comment (with accession numbers) in the "Availability of supporting data" section (lines 409-416).

**Reviewer #2:** In their paper, Greig et al. compare the performance of Oxford Nanopore Technology (ONT) and Illumina sequencing in identifying, subtyping and classifying clinical isolates in the context of outbreak investigation. This study is of considerable interest to both research and medical communities in two key aspects. Firstly, it provides an in-depth assessment of the performance of ONT versus the current sequencing standard Illumina Technology, and identifies the main mechanistic reason for discrepancies between the technologies (DNA methylation), which would be of value in optimizing and improving Nanopore analysis workflows. Secondly, they demonstrate that their real-time ONT analysis pipeline is able to rapidly provide diagnostic calls (species identification, serotyping etc) with comparable accuracy to Illumina sequencing in a fraction of the time, which has major potential applications in outbreak investigation.

Given the utility of this study, I would be happy to recommend it for publication - please consider the following points to possibly improve it further.

1) Are the methods appropriate to the aims of the study, are they well described, and are necessary controls included?

1. The sample size of 2 isolates is small, but justified given the context of the study (2 urgent cases of children with HUS admitted to the same hospital on the same night). However, if the authors have any other isolates sequenced (in particular, a reference isolate closely related to the reference genome) that allow for the comparison of Illumina/ONT, they could include it as supplemental information to improve the robustness of their assessment.

Currently we have only processed these two STEC O157:H7 samples using this methodology, we are hoping to follow up this manuscript in the future on a larger set of samples.

2. Run parameters for bioinformatics tools are well optimized and described. It would also be of major help to the community if the authors are willing to share the code for their real-time analysis pipeline.

Each component/tool was run individually during this study. We have not developed an automated pipeline though this is something we plan to develop in the future.

3. The authors adequately discuss the limitations of ONT relative to Illumina sequencing with respect to their application in rapid diagnosis.

Fig 1/Methods - In the comparison of the ONT/Illumina workflows, we note that two different DNA

extraction methods are used (manual + QiaSymphony cleanup for Illumina, Promega Wizard Genomic DNA Purification for ONT). Are the methods interchangeable for the purposes of the workflow?

See point 7 for reviewer 1

2) Are the conclusions adequately supported by the data shown?

Analyses are generally robust and well-supported, but we would like clarification on the following points:

4. Line 214 - When comparing the case B ONT sequence with the 3 concurrent outbreak isolates, was it compared against Illumina sequences, or Nanopore sequences? If the comparison was between ONT and Illumina sequences, the discordance might arise from differences in the base-calling/software methods, and might disappear if all isolates were sequenced with ONT and compared directly (or would the high error rate preclude a valid comparison?) Please clarify and comment.

The outbreak case B sequenced via ONT was compared to Illumina sequenced isolates (and the equivalent case B sample sequenced via Illumina). We believe that the observed differences are inherent errors in both technologies. Our hypothesis is in agreement with yours, that comparing ONT to ONT sequenced outbreak strains would remove these discrepancies.

5. Line 216-218 - Given that 7 SNPs is not too dramatic a difference one could still make the case that the cases are quite plausibly linked. Would you be able to set an approximate SNV threshold for concluding genetic linkage?

Currently we use 5 SNPs as a proxy to infer genetic linkage or sharing the same epidemiological source with Illumina sequenced strains, through extensive validation from sequencing known outbreaks. With ONT sequencing and due to the lack of background sequenced samples we are unable to comment on an "appropriate" SNP threshold. We would have to take into account comparing ONT to Illumina data, Illumina to Illumina data and ONT to ONT data to decide if each type of comparison requires a different threshold or if we could set a general one to cover all comparisons.

3) Please indicate the quality of language in the manuscript. Does it require a heavy editing for language and clarity?

6. The language of the manuscript is quite clear. Please correct "manufactures instructions" to "manufacturer's instructions".

This has now been corrected at each use.

7. I also feel that the title of the manuscript downplays the speed and relative accuracy of the ONT diagnostic pipeline - the focus of the title should not be on the comparison of SNVs, but rather the comparison of the overall performance of the two methods. A title reflecting this and highlighting the rapid, real-time analysis capability of ONT-based diagnostics would be able to better capture reader interest and increase the impact of the manuscript.
8. Similarly, the abstract should be edited to emphasize the speed and real-time analysis capability.

We feel that the current title is appropriate for this study as the emphasis was that in conjunction with the nanopore being a rapid, real-time portable sequencer the current dogma is that variant calling is currently out of scope for this technology due to the high error rate. This manuscript refutes that dogma.

4) Are you able to assess all statistics in the manuscript, including the appropriateness of statistical tests used? Yes - our group has experience analysing similar datasets. The precision/recall analysis performed is straightforward and appropriate.

(This manuscript was co-reviewed with Weizhen Xu, a postdoctoral fellow in my research group)

**Reviewer #3:** The authors examine the feasibility of using Nanopore sequencing to characterise single nucleotide variants in clinically relevant outbreaks. The authors present an interesting and relevant comparison of sequencing technologies given the rapid uptake of WGS as a clinical diagnostic tool. The data set is clearly described and accession code for all data submitted to the SRA are available in the manuscript and online. The methods are well described and all software/Bioinformatic tools are available online.

1. Although it can be addressed, my main concern with the manuscript is that the research was part funded by Oxford Nanopore. I believe the authors have not fully addressed the limitations of the Nanopore sequencing technology e.g. Cost, variability in throughput, etc. I have highlighted some of these issues below. Platform limitations will also need to be included in the discussion

We have been more explicit to the funding received by Oxford Nanopore in the Acknowledgments. We have a paragraph on the limitations of ONT sequencing in terms of read accuracy and therefore variant detection which is the focus of this paper.

2. In the abstract and results the authors make a comparison of Illumina and ONT workflows of the time taken from DNA extraction to availability of results. The authors state that typing data (Shiga toxin subtyping and serotyping) was available within 7 hours while with Illumina it took ~40 hours to get these results. How do these time frames compare to standard laboratory based typing techniques that might be available in a diagnostic/pathology lab?

This paper covers the comparison between current methods deployed in the national reference laboratory – WGS by Illumina – with an alternative sequencing methodology ONT. It is out of scope of the paper to consider methods deployed in diagnostics e.g PCR

3. I would like to see a comparison of the sequencing costs for Illumina and Nanopore sequencing. A comparison against standard laboratory based typing techniques might also be beneficial to a broader audience ( I leave that to the authors to decide).

Costing the sequencing technologies is not the focus of this paper and a would need to be a paper in its' own right considering labour / non-labour cost, deployment models etc. Also the value of such a comparison is incredibly time limited.

4. The authors state that the genetic relatedness of isolates could be determined at ~6 hours. I assume by genetic relatedness we are talking about variant/SNP typing. Can the authors explain how variants could be determined at 6 hours yet a MLST profile for Case B could not be determined until 10 hours had passed? Surely an inability to determine a MLST type indicates that the genome has not yet been sufficiently covered and it therefore unsuitable for variant typing.

Our SNP typing process requires an average genome coverage of 30x, the ONT sequencing took 6 hours to achieve this. As a result, as soon as 30x coverage is passed, this process can begin. Whereas, when sequencing the seven MLST genes, we are looking for enough coverage of those genes so that krocus can give us a confirmed result. This typically takes much longer, the last read was aligned to the seventh MLST gene at about 10 hours to then generate a full MLST result.

5. Additionally, in order to be cost effective multiple samples would need to be sequenced on the same flowcell at the same time. Can the authors comment on what impacted multiplexing might have on the time frames described here?

This is correct, it is standard to multiplex several isolates per flow-cell. The higher the degree of multiplexing the increased pore competition we would expect the time to receive results per sample to increase. We have not performed this comparison. We have added this to the discussion

6. Can the authors comment as to why a number of regions (all describes as prophage with the exception of 1 in case A) were only present in the ONT-only chromosome assemblies? I find it odd that these regions were not present in the Illumina sequence data and are also absent from the

hybrid assembly. can the authors comment on why this might be the case and what impact that might have for genome sequencing and assembly strategies moving forward?

The main reason for the smaller assemblies in the Illumina and hybrid approaches is the large amount of paralogous sequences in STEC O157 encoded on cryptic phage. These sequences (which are longer than the Illumina read length) collapse into a single contig or are broken up into many small contigs with only a single copy when in reality they are multi-copy in the genome. This results in smaller genomes when Illumina reads alone or as a hybrid.

7. With regards to the genome assemblies of case A and Case B can the authors provide information on the number of erroneous indels that were present in the Nanopore assemblies? I assume these errors were polished out but did the authors only use Nanopore sequence data or was Illumina data also required.?

To keep the comparison as true as possible we only polished the ONT assembly with ONT data using Nanopolish. It is difficult in this case to quantify how many of the indels associated in the ONT assembly are correct or conversely incorrect in the Illumina assembly as many fall in prophage regions.

8. Line 129: Remove the MLST allele numbers

This has now been corrected.

9. Line 385: form -> for(?)

This has now been corrected.

10. Table 1 is very hard to interrupt. Consider restructuring the table.

We have reformatted the table to make the breakdown of SNPs clearer.
